# Supplementary material
Source: Royal Society of Chemistry journal article supplement (doi:10.1039/d6ob00641h)

# Photocatalytic radical addition/bicyclization of 1,7-enynes with *N*-sulfonylaminopyridinium salts/sulfamoyl chlorides: access to sulfonamide-containing benzo[*a*]fluoren-5-ones

Zhichao Chen,<sup>\*a,b</sup> Zhiyong Jiang,<sup>c</sup> Fengjiao Lv,<sup>a,b</sup> Xiaolan Xie<sup>\*a,b</sup>

<sup>a</sup>College of Chemical Engineering and Materials Science, Quanzhou Normal University, Quanzhou 362000, China. E-mail: [zcchen@qztc.edu.cn](mailto:zcchen@qztc.edu.cn); [xxl\\_qztc@163.com](mailto:xxl_qztc@163.com).

<sup>b</sup>Key Laboratory of Chemical Materials and Green Nanotechnology, College of Chemical Engineering and Materials Science, Quanzhou Normal University, Quanzhou 362000, China.

<sup>c</sup>College of Material Engineering, Fujian Agriculture and Forestry University, 63 Xiyuangong Road, Fuzhou 350002, PR China.

## Table of Contents

|                                                                                        |     |
|----------------------------------------------------------------------------------------|-----|
| 1. General information.....                                                            | S1  |
| 2. General experimental procedure .....                                                | S1  |
| 3. References .....                                                                    | S1  |
| 4. Mechanism experiments.....                                                          | S2  |
| 5. Large-scale synthesis of <b>3aa</b> and <b>5a</b> .....                             | S4  |
| 6. Crystal structures and data of <b>3aa</b> .....                                     | S5  |
| 7. Characterization of compounds <b>3</b> and <b>5</b> .....                           | S5  |
| 8. Copies of the <sup>1</sup> H, <sup>13</sup> C and <sup>19</sup> F NMR spectra ..... | S14 |

## 1. General information

Unless otherwise stated, all commercial materials and solvents were used directly without further purification.  $^1\text{H}$  and  $^{13}\text{C}$  NMR spectra were measured on a 400 MHz Bruker spectrometer ( $^1\text{H}$  400MHz,  $^{13}\text{C}$  100MHz,  $^{19}\text{F}$  NMR 376 MHz), using  $\text{CDCl}_3$  (spectra were referenced to the solvent peaks  $^1\text{H}$ : residual  $\text{CDCl}_3 = 7.26$  ppm,  $^{13}\text{C}$ :  $\text{CDCl}_3 = 77.0$  ppm) as the solvent. The following abbreviations were used to describe peak splitting patterns when appropriate: s (singlet), d (doublet), t (triplet), q (quartet), m (multiplet), dd (doublet of doublet), td (triplet of doublet). High-resolution mass spectra (HRMS) were measured on ESI-TOF. Column chromatography was performed on silica gel (70-230 mesh ASTM) using the reported eluent. Thin-layer chromatography (TLC) was carried out on 4×5 cm plates with a layer thickness of 0.2 mm (silica gel 60 F254). Photochemical reactions were performed with a LED reactor WP-TEC-1020SL (WATTCAS, China). Products were purified by flash chromatography on silica gels, eluting with petroleum ether/ethyl acetate. Crystal Growth Procedure: Approximately 30 mg of the sample (**3aa**) was dissolved in DCM (10 mL) and filtered, a small piece of cotton was used to ensure no solid particles would be present in the solubilized sample, this solution was transferred to a 25 mL vial, this vial was completed with hexanes (10 mL) and then closed, the crystal was formed within 5 days, the crystal was then analyzed. X-ray analysis was performed with a single-crystal X-ray diffractometer (Gemini E) from Agilent. 1,7-enynes **1** were prepared according to the reported literature.<sup>1</sup> *N*-sulfonylaminopyridinium salts **2** were prepared according to the reported literature.<sup>2</sup> All sulfamoyl chlorides were purchased from commercial sources (Adamas).

## 2. General experimental procedures

(1) General procedure for the synthesis of 1,7-enynes **1**<sup>1</sup>

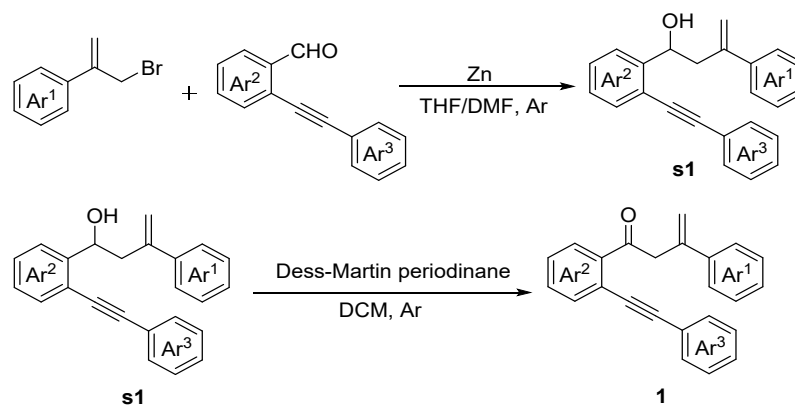

Under argon conditions, Zn powder (12.0 mmol, 3.0 equiv) and co-solvent of THF and DMF (10.0 mL) were added into a dried flask. Then 2-(phenylethynyl)benzaldehyde (4.0 mmol, 1.0 equiv) were added into this system. To this suspension, a solution of (3-bromoprop-1-en-2-yl)benzene (4.0 mmol, 1.0 equiv) in THF (2.8 mL) was dropwise and stirred for 16 h. After that, it was quenched by saturated aqueous  $\text{NH}_4\text{Cl}$  and extracted with ethyl acetate. Purification by column chromatography over silica gel (200-300 mesh) using mixtures of petroleum ether and acetic ester (petroleum ether /acetic ester, 20:1, v/v) afforded compound **s1**.

Under argon conditions, Dess-Martin periodinane (3.0 mmol, 1.5 equiv) and  $\text{CH}_2\text{Cl}_2$  (3 mL) were

added into a dried flask. Then, the mixture was cooled down to 0 °C. Next, compound **s1** (2.0 mmol, 1.0 equiv) was dropwise. After stirring at this temperature for 2.0 h, and it was quenched by saturated aqueous NaHCO<sub>3</sub>. Then the mixture was extracted with DCM and concentrated under vacuum. The residue was purified by flash column chromatography on silica gel (200-300 mesh) using mixtures of petroleum ether /acetic ester, 50:1, v/v) afforded 1,7-enynes **1**.

(2) General procedure for the synthesis of *N*-sulfonylaminopyridinium salts **2**<sup>2</sup>

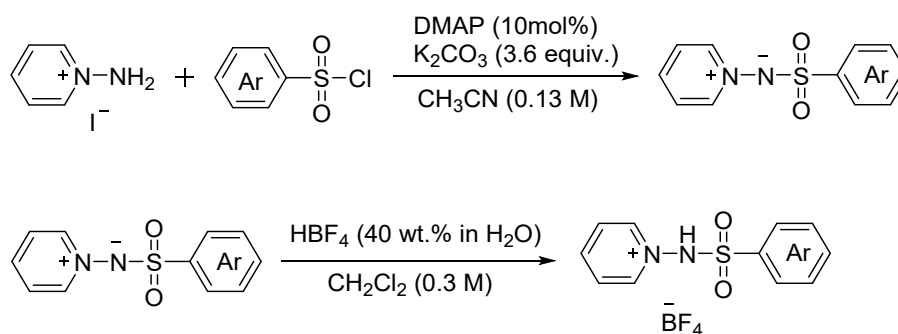

To a solution of 1-aminopyridinium iodide (10 mmol, 2.22 g) and distilled-CH<sub>3</sub>CN (77 mL, 0.13 M) were added DMAP (10 mol%, 122 mg), K<sub>2</sub>CO<sub>3</sub> (36 mmol, 4.96 g) and sulfonyl chloride (10 mmol, 1.9 g) at 0 °C (ice water bath) under N<sub>2</sub>. Then, the cooling bath was removed and the reaction mixture was stirred at room temperature for 6 h. The suspension was filtered and concentrated in vacuo. The residue was suspended in DCM and filtered to remove inorganic impurities. After the solvent was removed under reduced pressure, The crude product was purified by column chromatography on silica gel with DCM/MeOH (20:1) as eluent to afford pure product. The obtained ylide (5 mmol, 1.24 g) was dissolved in DCM (17 mL, 0.3 M) and tetrafluoroboric acid solution (40 wt.% in H<sub>2</sub>O) (7.5 mmol, 653 uL) was added to the solution at room temperature. The reaction mixture was stirred for 30 min, then the product was precipitated with Et<sub>2</sub>O. The resulting precipitate was filtered off, washed with Et<sub>2</sub>O and dried under vacuum.

(3) General procedure for preparation of benzo[a]fluoren-5-ones **3**.

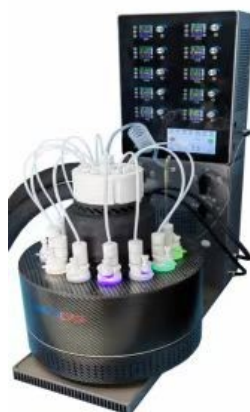

**Figure S1** The WP-TEC-1020SL photochemical reaction system with the blue light LED

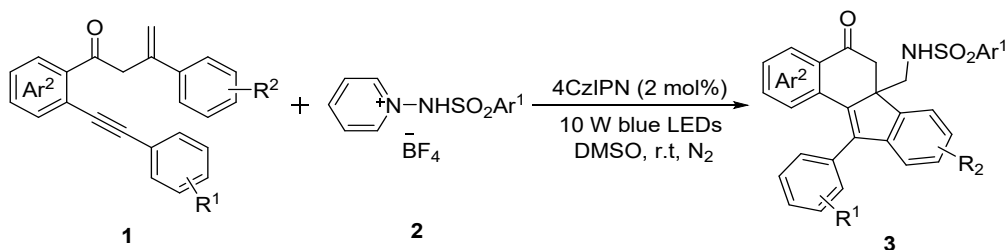

1,7-enynes **1** (0.2 mmol), *N*-sulfonylaminopyridinium salts **2** (0.24 mmol, 1.2 equiv), 4CzIPN (0.004 mmol, 0.02 equiv) and 2 mL DMSO were added in a schlenk tube. The mixture was stirred at room temperature (rt) for 12 h in the photochemical reactor (Figure S1) with 10 W blue LED as light source under N<sub>2</sub> atmosphere. Upon completion of the reaction, the reaction was then diluted with H<sub>2</sub>O (30 mL), the aqueous layer was then extracted with CH<sub>2</sub>Cl<sub>2</sub> (3×20 mL) and all organics combined and dried (Na<sub>2</sub>SO<sub>4</sub>). The suspension was then filtered, concentrated and purified by flash chromatography (EtOAc/PE: 1/6) to give the desired products **3**.

(4) General procedure for preparation of benzo[a]fluoren-5-ones **5**.

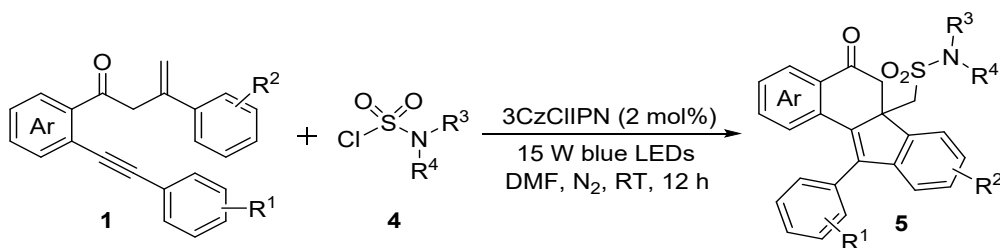

1,7-enynes **1** (0.2 mmol), sulfamoyl chlorides **4** (0.4 mmol, 2.0 equiv), 3CzClIPN (0.004 mmol, 0.02 equiv) and 2 mL DMF were added in a schlenk tube. The mixture was stirred at room temperature (rt) for 12 h in the photochemical reactor (Figure S1) with 15 W blue LED as light source under N<sub>2</sub> atmosphere. Upon completion of the reaction, the reaction was then diluted with H<sub>2</sub>O (30 mL), the aqueous layer was then extracted with CH<sub>2</sub>Cl<sub>2</sub> (3×20 mL) and all organics combined and dried (Na<sub>2</sub>SO<sub>4</sub>). The suspension was then filtered, concentrated and purified by flash chromatography (EtOAc/PE: 1/8) to give the desired products **5**.

### 3. References

- [1] Huang, M.-H.; Zhu, Y.-L.; Hao, W.-J.; Wang, A.-F.; Wang, D.-C.; Liu, F.; Wei, P.; Tu, S.-J.; Jiang, B. Visible-Light Photocatalytic Bicyclization of 1,7-Enynes toward Functionalized Sulfone-Containing Benzo[a]fluoren-5-ones. *Adv. Synth. Catal.* **2017**, *359*, 2229-2234.
- [2] (a) Pan, C.; Luo, S.; Wu, Y.; Yu, J.-T.; Zhu, C. Photo-Induced Cyclization of Olefinic Amides towards Sulfonamidylated Iminoisobenzofurans and Benzoxazines. *Org. Chem. Front.* **2023**, *10*, 3479-3484. (b) Pan, C.; Yang, Z.; Wu, X.; Yu, J.-T.; Zhu, C. Substituent-Controlled Regioselective Photoinduced Cyclization of *N*-Allylbenzamides with *N*-Sulfonylaminopyridinium Salts. *Org. Lett.* **2023**, *25*, 494-499.

## 4. Mechanism Exploration

(1) Trapping experiment with 2,2,6,6-tetramethylpiperidin-1-oxyl (TEMPO)

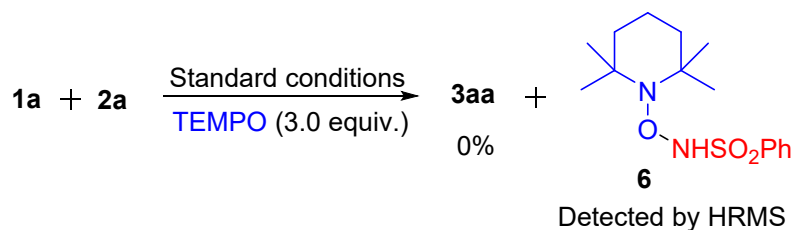

1,7-enyne **1a** (0.2 mmol), *N*-sulfonylaminopyridinium salt **2a** (0.24 mmol, 1.2 equiv), 4CzIPN (0.004 mmol, 0.02 equiv), TEMPO (0.6 mmol, 3.0 equiv) and 2 mL DMSO were added in a schlenk tube. The mixture was stirred at room temperature (rt) for 12 h in the photochemical reactor with 10 W blue LED as light source under N<sub>2</sub> atmosphere. The resulting mixture was monitored by TLC, and TEMPO adduct to sulfonyl radical was detected by HRMS (Figure S2). HRMS (ESI) *m/z* calcd for C<sub>15</sub>H<sub>25</sub>N<sub>2</sub>O<sub>3</sub>S [M+H]<sup>+</sup> 313.1586, found 313.1580.

### Elemental Composition Report

Page 1

#### Single Mass Analysis

Tolerance = 5.0 mDa / DBE: min = -1.5, max = 50.0

Element prediction: Off

Number of isotope peaks used for i-FIT = 3

Monoisotopic Mass, Even Electron Ions

22 formula(e) evaluated with 1 results within limits (up to 50 closest results for each mass)

Elements Used:

C: 0-15 H: 0-25 N: 0-2 O: 0-3 S: 0-1

20250525-6-1-Pos 173 (0.698)

1: TOF MS ES+

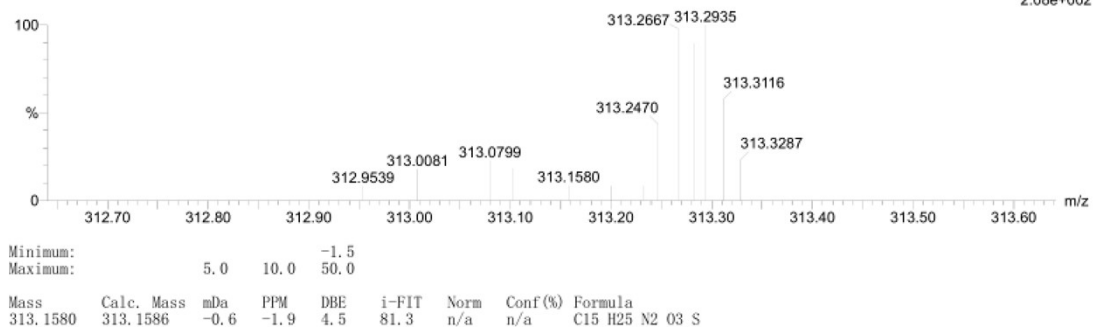

Figure S2

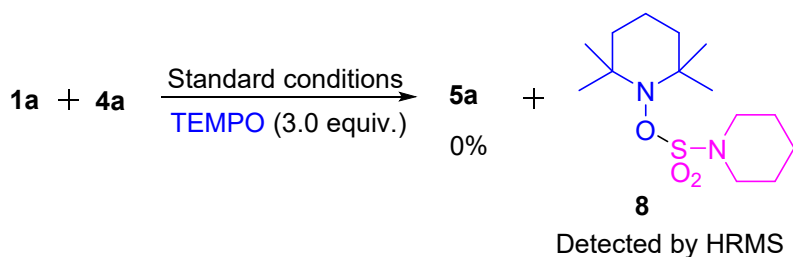

1,7-enyne **1a** (0.2 mmol), sulfamoyl chlorides **4a** (0.4 mmol, 2.0 equiv), 3CzCIIPN (0.004 mmol, 0.02 equiv), TEMPO (0.6 mmol, 3.0 equiv) and 2 mL DMF were added in a schlenk tube. The mixture was stirred at room temperature (rt) for 12 h in the photochemical reactor with 10 W blue LED as light source under N<sub>2</sub> atmosphere. The resulting mixture was monitored by TLC, and TEMPO adduct to sulfuryl radical was detected by HRMS (Figure S3). HRMS (ESI) m/z calcd for C<sub>14</sub>H<sub>29</sub>N<sub>2</sub>O<sub>3</sub>S [M+H]<sup>+</sup> 305.1899, found 305.1899.

#### Elemental Composition Report

Page 1

#### Single Mass Analysis

Tolerance = 5.0 mDa / DBE: min = -1.5, max = 50.0

Element prediction: Off

Number of isotope peaks used for i-FIT = 3

Monoisotopic Mass, Even Electron Ions

725 formula(e) evaluated with 1 results within limits (up to 50 best isotopic matches for each mass)

Elements Used:

C: 14-14 H: 29-29 N: 0-100 O: 0-100 Na: 0-1 S: 1-3

26

260123-15-CZL-15 44 (0.264)

1: TOF MS ES+  
3.20e+001

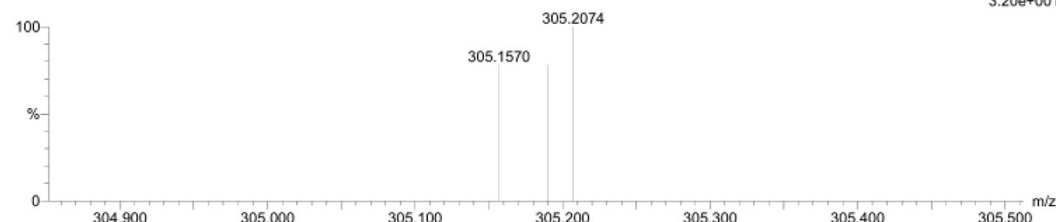

Minimum: -1.5  
Maximum: 5.0 10.0 50.0

| Mass     | Calc. Mass | mDa | PPM | DBE | i-FIT | Norm | Conf (%) | Formula         |
|----------|------------|-----|-----|-----|-------|------|----------|-----------------|
| 305.1899 | 305.1899   | 0.0 | 0.0 | 1.5 | 19.2  | n/a  | n/a      | C14 H29 N2 O3 S |

Figure S3

(2) Trapping experiment with butylated hydroxytoluene (BHT)

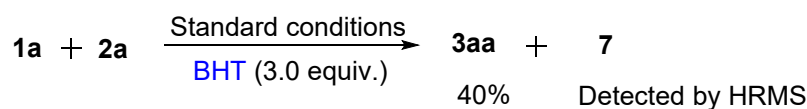

1,7-enyne **1a** (0.2 mmol), *N*-sulfonylaminopyridinium salt **2a** (0.24 mmol, 1.2 equiv), 4CzIPN (0.004 mmol, 0.02 equiv), BHT (0.6 mmol, 3.0 equiv) and 2 mL DMSO were added in a schlenk tube. The mixture was stirred at room temperature (rt) for 12 h in the photochemical reactor with 10 W blue LED as light source under N<sub>2</sub> atmosphere. The resulting mixture was monitored by TLC, and TEMPO adduct to sulfuryl radical was detected by HRMS (Figure S4). HRMS (ESI) m/z calcd for C<sub>21</sub>H<sub>30</sub>NO<sub>3</sub>S [M+H]<sup>+</sup> 376.1946, found 376.1945.

## Single Mass Analysis

Tolerance = 5.0 mDa / DBE: min = -1.5, max = 50.0

Element prediction: Off

Number of isotope peaks used for i-FIT = 3

Monoisotopic Mass, Even Electron Ions

20 formula(e) evaluated with 1 results within limits (up to 50 closest results for each mass)

Elements Used:

C: 0-21 H: 0-30 N: 0-2 O: 0-3 S: 0-1

20250525-6-2-Pos 235 (0.939)

1: TOF MS ES+

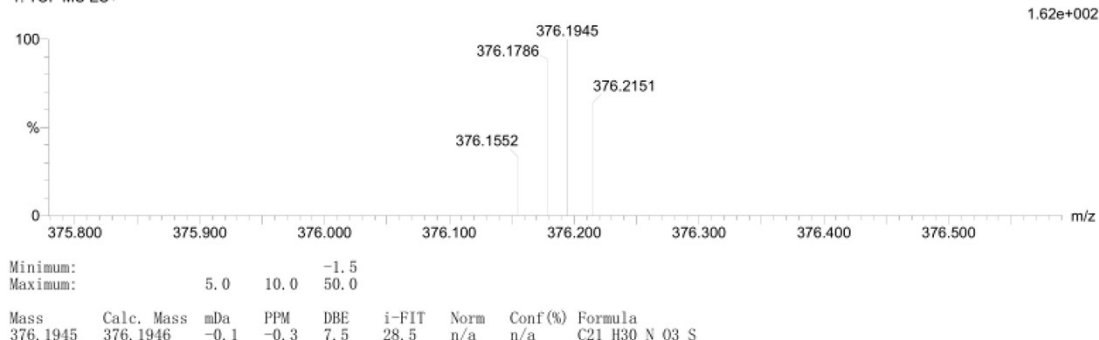

Figure S4

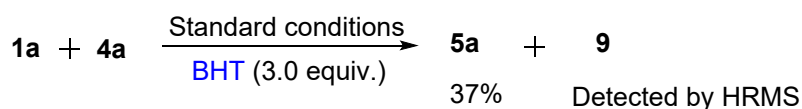

1,7-enyne **1a** (0.2 mmol), sulfamoyl chlorides **4a** (0.4 mmol, 2.0 equiv), 3CzCIIPN (0.004 mmol, 0.02 equiv), BHT (0.6 mmol, 3.0 equiv) and 2 mL DMF were added in a schlenk tube. The mixture was stirred at room temperature (rt) for 12 h in the photochemical reactor with 15 W blue LED as light source under N<sub>2</sub> atmosphere. The resulting mixture was monitored by TLC, and BHT adduct to sulfuryl radical was detected by HRMS (Figure S5). HRMS (ESI) m/z calcd for C<sub>20</sub>H<sub>34</sub>NO<sub>3</sub>S [M+H]<sup>+</sup> 368.2259, found 368.2254.

## Single Mass Analysis

Tolerance = 5.0 mDa / DBE: min = -1.5, max = 50.0

Element prediction: Off

Number of isotope peaks used for i-FIT = 3

Monoisotopic Mass, Even Electron Ions

1202 formula(e) evaluated with 1 results within limits (up to 50 best isotopic matches for each mass)

Elements Used:

C: 20-20 H: 34-34 N: 0-100 O: 0-100 Na: 0-1 S: 1-3

26

260123-15-CZL-16 13 (0.093)

1: TOF MS ES+  
8.80e+001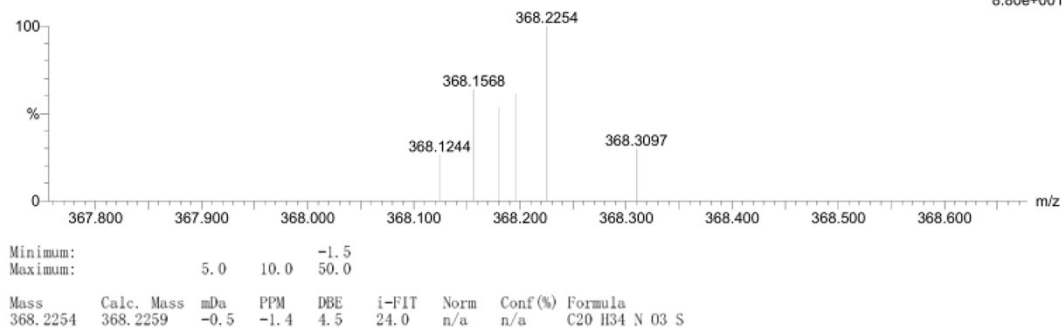

Figure S5

### (3) Light/dark experiments

**In order to illustrate the reaction mechanism, the light/dark experiments were conducted.**

1,7-enyne **1a** (0.2 mmol), *N*-sulfonylaminopyridinium salt **2a** (0.24 mmol, 1.2 equiv), 4CzIPN (0.004 mmol, 0.02 equiv) and 2 mL DMSO were added in a schlenk tube. The reaction mixture was exposed to 10 W blue LEDs irradiation under N<sub>2</sub> atmosphere at room temperature with stirring for 2 h, then stirring for 2 h without irradiation. The following product yields based on the irradiation with 10 W blue LEDs under N<sub>2</sub> atmosphere at room temperature for a certain time, and without irradiation for a certain time were also presented in the Figure S6.

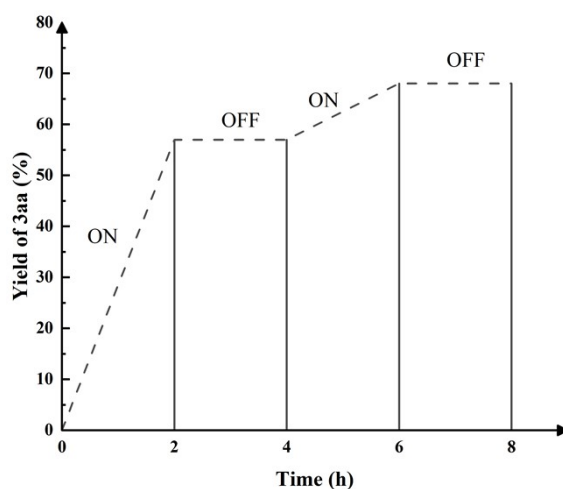

**Figure S6** Light/dark experiments (1a + 2a)

1,7-enyne **1a** (0.2 mmol), sulfamoyl chlorides **4a** (0.4 mmol, 2.0 equiv), 3CzCIIPN (0.004 mmol, 0.02 equiv) and 2 mL DMf were added in a schlenk tube. The reaction mixture was exposed to 15 W blue LEDs irradiation under N<sub>2</sub> atmosphere at room temperature with stirring for 2 h, then stirring for 2 h without irradiation. The following product yields based on the irradiation with 10 W blue LEDs under N<sub>2</sub> atmosphere at room temperature for a certain time, and without irradiation for a certain time were also presented in the Figure S7.

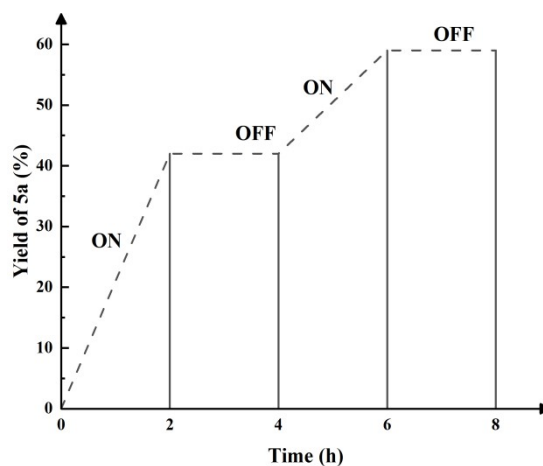

**Figure S7** Light/dark experiments (1a + 4a)

## 5. Large-scale synthesis of 3aa and 5a

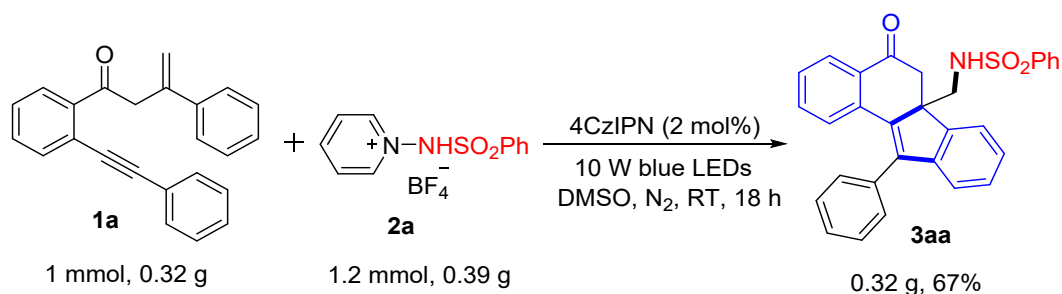

1,7-enyne **1a** (1 mmol, 0.32 g), thianthrenium salt **2a** (1.2 mmol, 0.39 g, 1.2 equiv), 4CzIPN (0.02 mmol, 0.02 equiv) and 5 mL DMSO were added in a schlenk tube. The mixture was stirred at room temperature (rt) for 18 h in the photochemical reactor with 10 W blue LED as light source under N<sub>2</sub> atmosphere. Upon completion of the reaction, the solvent was removed under reduced pressure by rotary evaporator. Then, the residue was purified by silica gel column chromatography to give the desired products **3aa** in 67% yield (0.32 g).

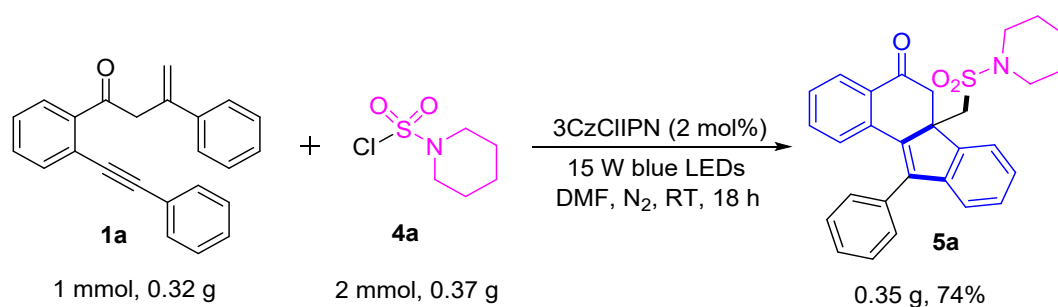

1,7-enyne **1a** (1 mmol, 0.32 g), sulfamoyl chlorides **4a** (2.0 mmol, 0.37 g, 2.0 equiv), 3CzCIIPN (0.02 mmol, 0.02 equiv) and 5 mL DMF were added in a schlenk tube. The mixture was stirred at room temperature (rt) for 18 h in the photochemical reactor with 15 W blue LED as light source under N<sub>2</sub> atmosphere. Upon completion of the reaction, the solvent was removed under reduced pressure by rotary evaporator. Then, the residue was purified by silica gel column chromatography to give the desired products **5a** in 74% yield (0.35 g).

## 6. Crystal structures and data of 3aa

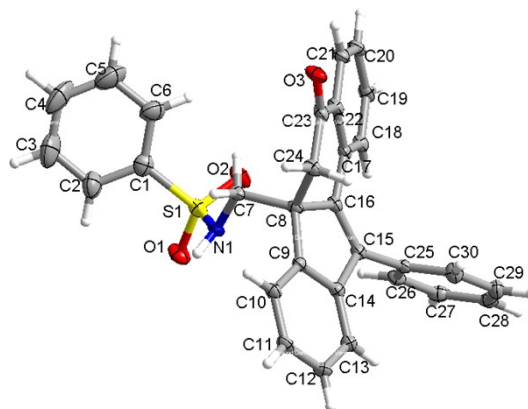

**Figure S5** X-ray Crystallography Structure of Compounds **3aa** (CCDC 2516414)

Displacement ellipsoids are shown at the 50% probability level

**Table 1 Crystal data and structure refinement for 3aa.**

|                                             |                                                               |
|---------------------------------------------|---------------------------------------------------------------|
| Identification code                         | <b>3aa</b>                                                    |
| Empirical formula                           | C <sub>30</sub> H <sub>23</sub> NO <sub>3</sub> S             |
| Formula weight                              | 477.55                                                        |
| Temperature/K                               | 150.00(10)                                                    |
| Crystal system                              | triclinic                                                     |
| Space group                                 | P-1                                                           |
| a/Å                                         | 9.58611(18)                                                   |
| b/Å                                         | 12.4288(3)                                                    |
| c/Å                                         | 20.4263(5)                                                    |
| α/°                                         | 86.498(2)                                                     |
| β/°                                         | 83.6531(18)                                                   |
| γ/°                                         | 88.7926(18)                                                   |
| Volume/Å <sup>3</sup>                       | 2413.98(10)                                                   |
| Z                                           | 4                                                             |
| ρ <sub>calc</sub> /cm <sup>3</sup>          | 1.314                                                         |
| μ/mm <sup>-1</sup>                          | 0.167                                                         |
| F(000)                                      | 1000.0                                                        |
| Crystal size/mm <sup>3</sup>                | 0.17 × 0.12 × 0.1                                             |
| Radiation                                   | Mo Kα (λ = 0.71073)                                           |
| 2θ range for data collection/°              | 4.276 to 52.742                                               |
| Index ranges                                | -11 ≤ h ≤ 11, -15 ≤ k ≤ 15, -25 ≤ l ≤ 25                      |
| Reflections collected                       | 30065                                                         |
| Independent reflections                     | 9835 [R <sub>int</sub> = 0.0371, R <sub>sigma</sub> = 0.0432] |
| Data/restraints/parameters                  | 9835/0/639                                                    |
| Goodness-of-fit on F <sup>2</sup>           | 1.072                                                         |
| Final R indexes [I ≥ 2σ (I)]                | R <sub>1</sub> = 0.0529, wR <sub>2</sub> = 0.1243             |
| Final R indexes [all data]                  | R <sub>1</sub> = 0.0753, wR <sub>2</sub> = 0.1317             |
| Largest diff. peak/hole / e Å <sup>-3</sup> | 0.28/-0.38                                                    |

## 7. Characterization of compounds 3 and 5

*N*-((5-oxo-11-phenyl-5,6-dihydro-6aH-benzo[*a*]fluoren-6a-yl)methyl)benzenesulfonamide(**3aa**)

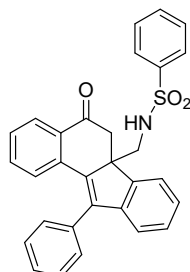

White solid. 71.3 mg. Yield: 75%. Purification by column chromatography (EtOAc/Pe, 1:6 v/v). mp 195-197°C. <sup>1</sup>H NMR (400 MHz, CDCl<sub>3</sub>) δ 8.04 (dd, *J* = 7.6, 1.3 Hz, 1H), 7.53 – 7.43 (m, 6H), 7.39 (d, *J* = 6.8 Hz, 2H), 7.35 – 7.21 (m, 8H), 7.05 – 6.99 (m, 1H), 4.08 (t, *J* = 6.2 Hz, 1H), 3.49 (dd, *J* = 12.5, 5.7 Hz, 1H), 3.31 – 3.18 (m, 2H), 2.55 (d, *J* = 16.8 Hz, 1H). <sup>13</sup>C {<sup>1</sup>H} NMR (100 MHz, CDCl<sub>3</sub>) δ 196.0, 146.7, 145.6, 141.3, 139.3, 138.1, 134.8, 133.9, 133.8, 132.5, 130.1, 129.1, 129.0, 128.6, 128.4, 128.2, 127.7, 127.6, 126.8, 126.8, 122.0, 121.8, 55.4, 47.7, 45.8. HRMS (ESI) *m/z* calcd for C<sub>30</sub>H<sub>24</sub>NO<sub>3</sub>S [M+H]<sup>+</sup> 478.1477, found 478.1476.

4-Methyl-*N*-((5-oxo-11-phenyl-5,6-dihydro-6aH-benzo[*a*]fluoren-6a-yl)methyl)benzenesulfonamide(**3ab**)

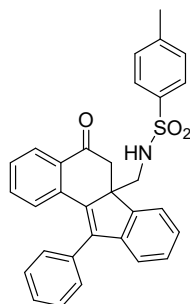

White solid. 58.4 mg. Yield: 59%. Purification by column chromatography (EtOAc/Pe, 1:6 v/v). mp 197-199°C. <sup>1</sup>H NMR (400 MHz, CDCl<sub>3</sub>) δ 8.02 (dd, *J* = 7.6, 1.5 Hz, 1H), 7.51 – 7.43 (m, 3H), 7.37 (d, *J* = 8.2 Hz, 4H), 7.33 – 7.25 (m, 4H), 7.25 – 7.18 (m, 2H), 7.09 (d, *J* = 8.1 Hz, 2H), 7.05 – 7.00 (m, 1H), 4.22 (t, *J* = 6.2 Hz, 1H), 3.46 (dd, *J* = 12.4, 5.9 Hz, 1H), 3.28 – 3.14 (m, 2H), 2.52 (d, *J* = 16.8 Hz, 1H), 2.36 (s, 3H). <sup>13</sup>C {<sup>1</sup>H} NMR (100 MHz, CDCl<sub>3</sub>) δ 196.1, 146.8, 145.5, 143.2, 141.3, 138.1, 136.3, 134.8, 133.9, 133.7, 130.1, 129.6, 129.1, 129.1, 128.5, 128.4, 128.1, 127.7, 127.5, 126.9, 126.7, 122.0, 121.9, 55.4, 47.7, 45.8, 21.5. HRMS (ESI) *m/z* calcd for C<sub>31</sub>H<sub>26</sub>NO<sub>3</sub>S [M+H]<sup>+</sup> 492.1633, found 492.1636.

4-Methoxy-*N*-((5-oxo-11-phenyl-5,6-dihydro-6aH-benzo[*a*]fluoren-6a-yl)methyl)benzenesulfonamide(**3ac**)

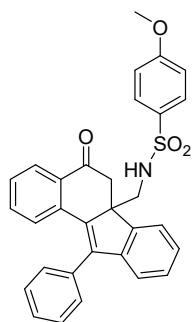

White solid. 67.5 mg. Yield: 67%. Purification by column chromatography (EtOAc/Pe, 1:8 v/v). mp 196-198°C.  $^1\text{H}$  NMR (400 MHz,  $\text{CDCl}_3$ )  $\delta$  8.05 – 7.99 (m, 1H), 7.50 – 7.35 (m, 7H), 7.33 – 7.19 (m, 6H), 7.02 (dd,  $J = 7.6, 1.2$  Hz, 1H), 6.78 – 6.71 (m, 2H), 4.19 (t,  $J = 6.2$  Hz, 1H), 3.81 (s, 3H), 3.46 (dd,  $J = 12.4, 5.9$  Hz, 1H), 3.28 – 3.14 (m, 2H), 2.52 (d,  $J = 16.7$  Hz, 1H).  $^{13}\text{C}$   $\{^1\text{H}\}$  NMR (100 MHz,  $\text{CDCl}_3$ )  $\delta$  196.1, 162.7, 146.8, 145.5, 141.3, 138.1, 134.8, 133.9, 133.7, 130.7, 130.1, 129.1, 129.0, 128.5, 128.4, 128.1, 127.7, 127.5, 126.7, 122.0, 121.9, 114.1, 55.6, 55.3, 47.6, 45.9. HRMS (ESI)  $m/z$  calcd for  $\text{C}_{31}\text{H}_{26}\text{NO}_4\text{S}$   $[\text{M}+\text{H}]^+$  508.1583, found 508.1580.

4-(Tert-butyl)-N-((5-oxo-11-phenyl-5,6-dihydro-6aH-benzo[a]fluoren-6a-yl)methyl)benzenesulfonamide (**3ad**)

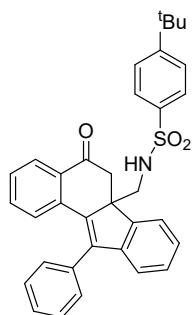

White solid. 69.2 mg. Yield: 65%. Purification by column chromatography (EtOAc/Pe, 1:8 v/v). mp 251-252°C.  $^1\text{H}$  NMR (400 MHz,  $\text{CDCl}_3$ )  $\delta$  8.07 – 8.01 (m, 1H), 7.52 – 7.44 (m, 3H), 7.40 (t,  $J = 7.0$  Hz, 4H), 7.34 – 7.21 (m, 8H), 7.06 – 7.00 (m, 1H), 4.07 (t,  $J = 6.3$  Hz, 1H), 3.49 (dd,  $J = 12.5, 5.8$  Hz, 1H), 3.30 – 3.18 (m, 2H), 2.55 (d,  $J = 16.8$  Hz, 1H), 1.30 (s, 3H).  $^{13}\text{C}$   $\{^1\text{H}\}$  NMR (100 MHz,  $\text{CDCl}_3$ )  $\delta$  196.0, 156.2, 146.8, 145.5, 141.2, 138.2, 136.3, 134.8, 133.9, 133.7, 130.1, 129.1, 129.0, 128.5, 128.4, 128.2, 127.7, 127.6, 126.7, 126.0, 122.0, 121.8, 55.4, 47.7, 45.9, 35.1, 31.1. HRMS (ESI)  $m/z$  calcd for  $\text{C}_{34}\text{H}_{32}\text{NO}_3\text{S}$   $[\text{M}+\text{H}]^+$  534.2103, found 534.2105.

4-Fluoro-N-((5-oxo-11-phenyl-5,6-dihydro-6aH-benzo[a]fluoren-6a-yl)methyl)benzenesulfonamide (**3ae**)

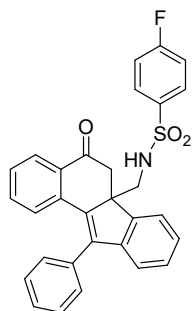

White solid. 64.6 mg. Yield: 65%. Purification by column chromatography (EtOAc/Pe, 1:6 v/v). mp 213-215°C. <sup>1</sup>H NMR (400 MHz, CDCl<sub>3</sub>) δ 8.03 (dd, *J* = 7.6, 1.4 Hz, 1H), 7.55 – 7.44 (m, 5H), 7.41 – 7.35 (m, 2H), 7.34 – 7.26 (m, 4H), 7.25 – 7.20 (m, 2H), 7.02 – 6.92 (m, 3H), 4.22 (t, *J* = 6.1 Hz, 1H), 3.51 (dd, *J* = 12.5, 5.8 Hz, 1H), 3.28 – 3.17 (m, 2H), 2.54 (d, *J* = 16.7 Hz, 1H). <sup>13</sup>C {<sup>1</sup>H} NMR (100 MHz, CDCl<sub>3</sub>) δ 196.0, 164.9 (d, *J* = 254.6 Hz), 146.6, 145.5, 141.4, 137.9, 135.4 (d, *J* = 3.2 Hz), 134.7, 133.8, 133.8, 130.0, 129.6 (d, *J* = 9.4 Hz), 129.1, 129.0, 128.6, 128.5, 128.3, 127.6, 126.8, 122.1, 121.8, 116.2 (d, *J* = 22.6 Hz), 55.3, 47.7, 45.9. <sup>19</sup>F NMR (376 MHz, CDCl<sub>3</sub>) δ -105.40 (s). HRMS (ESI) *m/z* calcd for C<sub>30</sub>H<sub>23</sub>FNO<sub>3</sub>S [M+H]<sup>+</sup> 496.1383, found 496.1387.

4-Chloro-N-((5-oxo-11-phenyl-5,6-dihydro-6aH-benzo[a]fluoren-6a-yl)methyl)benzenesulfonamide(**3af**)

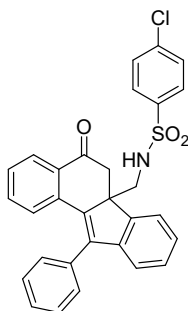

White solid. 61.2 mg. Yield: 60%. Purification by column chromatography (EtOAc/Pe, 1:6 v/v). mp 177-178°C. <sup>1</sup>H NMR (400 MHz, CDCl<sub>3</sub>) δ 8.02 (dd, *J* = 7.7, 1.5 Hz, 1H), 7.51 – 7.44 (m, 3H), 7.42 – 7.26 (m, 8H), 7.25 – 7.19 (m, 4H), 6.97 (dd, *J* = 7.8, 1.0 Hz, 1H), 4.24 (t, *J* = 6.0 Hz, 1H), 3.53 (dd, *J* = 12.5, 5.7 Hz, 1H), 3.28 – 3.16 (m, 2H), 2.53 (d, *J* = 16.8 Hz, 1H). <sup>13</sup>C {<sup>1</sup>H} NMR (100 MHz, CDCl<sub>3</sub>) δ 196.0, 146.6, 145.5, 141.4, 139.0, 137.8, 134.6, 133.8, 130.0, 129.3, 129.1, 129.0, 128.6, 128.5, 128.2, 127.6, 127.6, 126.8, 55.3, 47.6, 45.9. HRMS (ESI) *m/z* calcd for C<sub>30</sub>H<sub>23</sub>ClNO<sub>3</sub>S [M+H]<sup>+</sup> 512.1087, found 512.1086.

4-Bromo-N-((5-oxo-11-phenyl-5,6-dihydro-6aH-benzo[a]fluoren-6a-yl)methyl)benzenesulfonamide(**3ag**)

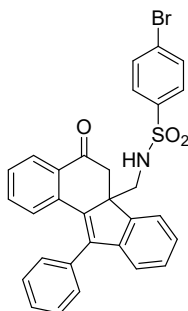

White solid. 72.8 mg. Yield: 65%. Purification by column chromatography (EtOAc/Pe, 1:6 v/v). mp 210-211°C. <sup>1</sup>H NMR (400 MHz, CDCl<sub>3</sub>) δ 8.02 (dd, *J* = 7.6, 1.4 Hz, 1H), 7.51 – 7.44 (m, 3H), 7.42 – 7.25 (m, 10H), 7.25 – 7.19 (m, 2H), 6.96 (dd, *J* = 7.7, 0.9 Hz, 1H), 4.24 (t, *J* = 6.1 Hz, 1H), 3.53 (dd, *J* = 12.5, 5.7 Hz, 1H), 3.28 – 3.17 (m, 2H), 2.53 (d, *J* = 16.8 Hz, 1H). <sup>13</sup>C {<sup>1</sup>H} NMR (100 MHz, CDCl<sub>3</sub>) δ 195.93, 146.5, 145.5, 141.4, 138.4, 137.8, 134.6, 133.8, 133.8, 132.2, 130.0, 129.1, 129.0, 128.6, 128.5, 128.3, 128.2, 127.6, 127.6, 127.5, 126.9, 122.1, 121.8, 55.3, 47.6, 45.9. HRMS (ESI) *m/z* calcd for C<sub>30</sub>H<sub>23</sub>BrNO<sub>3</sub>S [M+H]<sup>+</sup> 556.0582, found 556.0574.

*N*-((5-oxo-11-phenyl-5,6-dihydro-6aH-benzo[*a*]fluoren-6a-yl)methyl)-4-(trifluoromethoxy)benzenesulfonamide (**3ah**)

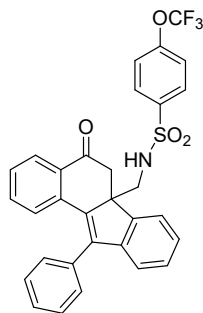

White solid. 79.5 mg. Yield: 71%. Purification by column chromatography (EtOAc/Pe, 1:5 v/v). mp 185-186°C. <sup>1</sup>H NMR (400 MHz, CDCl<sub>3</sub>) δ 8.02 (dd, *J* = 7.7, 1.4 Hz, 1H), 7.53 – 7.42 (m, 5H), 7.36 (dd, *J* = 5.5, 1.9 Hz, 2H), 7.33 – 7.16 (m, 6H), 7.10 (d, *J* = 8.1 Hz, 2H), 6.99 (dd, *J* = 7.7, 0.8 Hz, 1H), 4.44 (d, *J* = 5.6 Hz, 1H), 3.55 (dd, *J* = 12.6, 6.0 Hz, 1H), 3.29 – 3.18 (m, 2H), 2.52 (d, *J* = 16.8 Hz, 1H). <sup>13</sup>C {<sup>1</sup>H} NMR (100 MHz, CDCl<sub>3</sub>) δ 196.0, 151.8, 146.7, 145.5, 141.5, 137.8, 137.8, 134.7, 133.8, 133.7, 130.1, 129.1, 129.0, 128.9, 128.6, 128.5, 128.3, 127.6, 126.7, 122.0, 121.8, 120.8, 120.2 (q, *J* = 259.1 Hz), 55.3, 47.7, 45.8. <sup>19</sup>F NMR (376 MHz, CDCl<sub>3</sub>) δ -57.62 (s). HRMS (ESI) *m/z* calcd for C<sub>31</sub>H<sub>23</sub>F<sub>3</sub>NO<sub>4</sub>S [M+H]<sup>+</sup> 562.1300, found 562.1305.

*N*-((5-oxo-11-phenyl-5,6-dihydro-6aH-benzo[*a*]fluoren-6a-yl)methyl)-4-(trifluoromethyl)benzenesulfonamide (**3ai**)

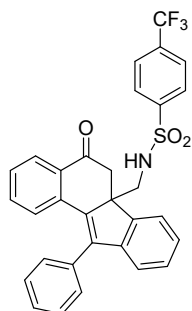

White solid. 63.1 mg. Yield: 58%. Purification by column chromatography (EtOAc/Pe, 1:5 v/v). mp 191-193°C. <sup>1</sup>H NMR (400 MHz, CDCl<sub>3</sub>) δ 8.02 (dd, *J* = 7.8, 1.3 Hz, 1H), 7.56 (q, *J* = 8.5 Hz, 4H), 7.51 – 7.44 (m, 3H), 7.36 (dd, *J* = 5.7, 1.8 Hz, 2H), 7.33 – 7.23 (m, 4H), 7.23 – 7.15 (m, 2H), 6.99 – 6.93 (m, 1H), 4.38 (t, *J* = 6.0 Hz, 1H), 3.58 (dd, *J* = 12.6, 5.8 Hz, 1H), 3.32 – 3.18 (m, 2H), 2.53 (d, *J* = 16.8 Hz, 1H). <sup>13</sup>C {<sup>1</sup>H} NMR (100 MHz, CDCl<sub>3</sub>) δ 195.9, 146.5, 145.5, 143.1, 141.5, 137.7, 134.6, 134.2, 133.9, 133.8, 133.7, 130.0, 129.1, 128.9, 128.7, 128.5, 128.3, 127.6, 127.5, 127.2, 126.8, 126.1 (q, *J* = 3.6 Hz), 123.2 (q, *J* = 272.9 Hz), 122.1, 121.7, 55.3, 47.7, 45.8. <sup>19</sup>F NMR (376 MHz, CDCl<sub>3</sub>) δ -63.12 (s). HRMS (ESI) *m/z* calcd for C<sub>31</sub>H<sub>23</sub>F<sub>3</sub>NO<sub>3</sub>S [M+H]<sup>+</sup> 546.1351, found 546.1355.

4-Acetyl-N-((5-oxo-11-phenyl-5,6-dihydro-6aH-benzo[a]fluoren-6a-yl)methyl)benzenesulfonamide(**3aj**)

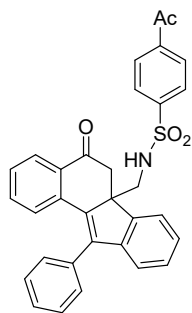

White solid. 69.7 mg. Yield: 67%. Purification by column chromatography (EtOAc/Pe, 1:5 v/v). mp 227-229°C. <sup>1</sup>H NMR (400 MHz, CDCl<sub>3</sub>) δ 8.02 (dd, *J* = 7.8, 1.2 Hz, 1H), 7.87 – 7.82 (m, 2H), 7.60 – 7.53 (m, 2H), 7.52 – 7.43 (m, 3H), 7.41 – 7.34 (m, 2H), 7.34 – 7.27 (m, 3H), 7.26 – 7.18 (m, 3H), 6.99 (dd, *J* = 7.8, 0.8 Hz, 1H), 4.28 (t, *J* = 6.1 Hz, 1H), 3.54 (dd, *J* = 12.6, 5.7 Hz, 1H), 3.32 – 3.17 (m, 2H), 2.61 (s, 3H), 2.55 (d, *J* = 16.8 Hz, 1H). <sup>13</sup>C {<sup>1</sup>H} NMR (100 MHz, CDCl<sub>3</sub>) δ 196.7, 195.9, 146.6, 145.5, 143.3, 141.5, 139.8, 137.8, 134.7, 133.8, 133.8, 130.0, 129.2, 129.0, 128.8, 128.7, 128.5, 128.2, 127.6, 127.1, 126.8, 122.1, 121.8, 55.3, 47.8, 45.8, 26.9. HRMS (ESI) *m/z* calcd for C<sub>32</sub>H<sub>26</sub>NO<sub>4</sub>S [M+H]<sup>+</sup> 520.1583, found 520.1580.

4-Cyano-N-((5-oxo-11-phenyl-5,6-dihydro-6aH-benzo[a]fluoren-6a-yl)methyl)benzenesulfonamide(**3ak**)

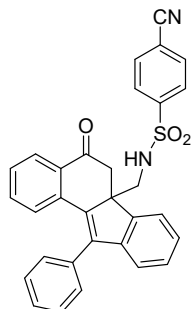

White solid. 58.7 mg. Yield: 58%. Purification by column chromatography (EtOAc/Pe, 1:5 v/v). mp 194-196°C. <sup>1</sup>H NMR (400 MHz, CDCl<sub>3</sub>) δ 8.04 (dd, *J* = 7.7, 1.3 Hz, 1H), 7.57 (s, 4H), 7.53 – 7.46 (m, 3H), 7.39 – 7.26 (m, 6H), 7.25 – 7.20 (m, 2H), 6.97 (dd, *J* = 7.8, 0.7 Hz, 1H), 4.32 (t, *J* = 6.1 Hz, 1H), 3.58 (dd, *J* = 12.7, 5.7 Hz, 1H), 3.32 – 3.17 (m, 2H), 2.55 (d, *J* = 16.7 Hz, 1H). <sup>13</sup>C {<sup>1</sup>H} NMR (100 MHz, CDCl<sub>3</sub>) δ 195.8, 146.4, 145.5, 143.8, 141.6, 137.6, 134.5, 133.8, 133.6, 132.8, 130.0, 129.2, 128.9, 128.8, 128.6, 128.4, 127.7, 127.5, 127.3, 126.9, 122.2, 121.7, 117.3, 116.2, 55.3, 47.8, 45.8. HRMS (ESI) *m/z* calcd for C<sub>31</sub>H<sub>23</sub>N<sub>2</sub>O<sub>3</sub>S [M+H]<sup>+</sup> 503.1429, found 503.1431.

3,5-Dichloro-N-((5-oxo-11-phenyl-5,6-dihydro-6aH-benzo[a]fluoren-6a-yl)methyl)benzenesulfonamide(**3al**)

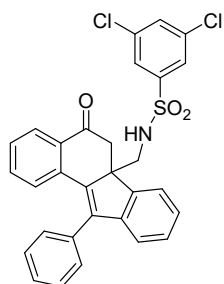

White solid. 70.2 mg. Yield: 64%. Purification by column chromatography (EtOAc/Pe, 1:6 v/v). mp 232-233°C. <sup>1</sup>H NMR (400 MHz, CDCl<sub>3</sub>) δ 8.06 (dd, *J* = 7.7, 1.4 Hz, 1H), 7.53 – 7.43 (m, 3H), 7.41 – 7.26 (m, 9H), 7.26 – 7.20 (m, 2H), 6.99 (dd, *J* = 7.7, 0.9 Hz, 1H), 4.27 (t, *J* = 6.0 Hz, 1H), 3.61 (dd, *J* = 12.8, 5.6 Hz, 1H), 3.33 (dd, *J* = 12.8, 6.6 Hz, 1H), 3.23 (d, *J* = 16.8 Hz, 1H), 2.56 (d, *J* = 16.8 Hz, 1H). <sup>13</sup>C {<sup>1</sup>H} NMR (100 MHz, CDCl<sub>3</sub>) δ 195.8, 146.4, 145.5, 142.6, 141.6, 137.7, 135.8, 134.5, 133.9, 133.7, 132.6, 130.0, 129.2, 128.9, 128.9, 128.5, 128.4, 127.7, 127.4, 126.8, 125.1, 122.0, 121.7, 55.3, 47.7, 45.8. HRMS (ESI) *m/z* calcd for C<sub>30</sub>H<sub>22</sub>Cl<sub>2</sub>NO<sub>3</sub>S [M+H]<sup>+</sup> 546.0697, found 546.0698.

2-Fluoro-N-((5-oxo-11-phenyl-5,6-dihydro-6aH-benzo[a]fluoren-6a-yl)methyl)benzenesulfonamide(**3am**)

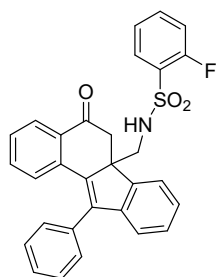

White solid. 56.1 mg. Yield: 57%. Purification by column chromatography (EtOAc/Pe, 1:6 v/v). mp 216-218°C. <sup>1</sup>H NMR (400 MHz, CDCl<sub>3</sub>) δ 8.03 (dd, *J* = 7.6, 1.5 Hz, 1H), 7.58 (td, *J* = 7.6, 1.7 Hz, 1H), 7.53 – 7.40 (m, 6H), 7.33 – 7.16 (m, 6H), 7.10 (td, *J* = 7.7, 0.8 Hz, 1H), 7.03 – 6.91 (m, 2H), 4.34 (t, *J* = 5.9 Hz, 1H), 3.61 (dd, *J* = 12.7, 5.8 Hz, 1H), 3.33 (dd, *J* = 12.7, 6.2 Hz, 1H), 3.23 (d, *J* = 16.8 Hz, 1H), 2.55 (d, *J* = 16.8 Hz, 1H). <sup>13</sup>C {<sup>1</sup>H} NMR (100 MHz, CDCl<sub>3</sub>) δ 195.9, 158.4 (d, *J* = 254.3 Hz), 146.6, 145.5, 141.5, 137.8, 134.7, 134.7, 134.6, 133.9, 133.8, 130.1, 129.9, 129.1 (d, *J* = 12.6 Hz), 128.7, 128.3 (d, *J* = 22.4 Hz), 127.6, 127.56 (d, *J* = 12.9 Hz), 126.8, 124.3 (d, *J* = 3.7 Hz), 122.0, 121.7, 116.9 (d, *J* = 21.0 Hz), 55.4, 47.9, 45.8. <sup>19</sup>F NMR (376 MHz, CDCl<sub>3</sub>) δ -110.23 (s). HRMS (ESI) *m/z* calcd for C<sub>30</sub>H<sub>23</sub>FNO<sub>3</sub>S [M+H]<sup>+</sup> 496.1383, found 496.1382.

2-Chloro-*N*-((5-oxo-11-phenyl-5,6-dihydro-6aH-benzo[*a*]fluoren-6a-yl)methyl)benzenesulfonamide(**3an**)

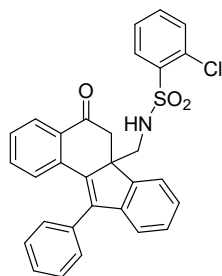

White solid. 69.3 mg. Yield: 68%. Purification by column chromatography (EtOAc/Pe, 1:6 v/v). mp 204-206°C. <sup>1</sup>H NMR (400 MHz, CDCl<sub>3</sub>) δ 8.05 – 8.00 (m, 1H), 7.79 (dd, *J* = 7.8, 1.6 Hz, 1H), 7.53 – 7.35 (m, 6H), 7.33 – 7.23 (m, 7H), 7.21 – 7.15 (m, 1H), 7.07 – 7.01 (m, 1H), 4.51 (t, *J* = 5.8 Hz, 1H), 3.56 (dd, *J* = 12.6, 5.8 Hz, 1H), 3.28 (dd, *J* = 12.6, 6.0 Hz, 1H), 3.20 (d, *J* = 16.8 Hz, 1H), 2.53 (d, *J* = 16.8 Hz, 1H). <sup>13</sup>C {<sup>1</sup>H} NMR (100 MHz, CDCl<sub>3</sub>) δ 195.9, 146.6, 145.5, 141.4, 137.9, 136.6, 134.6, 133.8 (d, *J* = 1.4 Hz), 133.5, 131.5, 131.2, 130.9, 130.0, 129.1, 129.0, 128.6, 128.5, 128.3, 127.7, 127.6, 127.0, 126.8, 122.1, 121.6, 55.4, 48.0, 46.1. HRMS (ESI) *m/z* calcd for C<sub>30</sub>H<sub>23</sub>ClNO<sub>3</sub>S [M+H]<sup>+</sup> 512.1087, found 512.1089.

*N*-((5-oxo-11-phenyl-5,6-dihydro-6aH-benzo[*a*]fluoren-6a-yl)methyl)thiophene-2-sulfonamide(**3ao**)

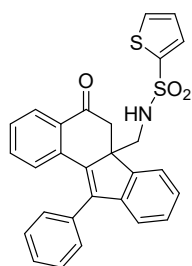

White solid. 63.7 mg. Yield: 66%. Purification by column chromatography (EtOAc/Pe, 1:6 v/v). mp 231-232°C. <sup>1</sup>H NMR (400 MHz, CDCl<sub>3</sub>) δ 8.07 – 8.01 (m, 1H), 7.52 – 7.36 (m, 6H), 7.35 – 7.28 (m, 4H), 7.27 – 7.22 (m, 3H), 7.09 – 7.04 (m, 1H), 6.89 (dd, *J* = 5.0, 3.8 Hz, 1H), 4.29 (t, *J* = 6.0 Hz, 1H), 3.56 (dd, *J* = 12.4, 5.7 Hz, 1H), 3.36 – 3.21 (m, 2H), 2.56 (d, *J* = 16.8 Hz, 1H). <sup>13</sup>C {<sup>1</sup>H} NMR (100 MHz, CDCl<sub>3</sub>) δ 196.1, 146.7, 145.5, 141.4, 140.2, 138.0, 134.8, 133.9, 133.8, 132.2, 132.0, 130.1, 129.1, 129.1, 128.6, 128.4, 128.3, 127.8, 127.6, 127.2, 126.8, 122.1, 121.8, 55.3, 48.0, 45.9. HRMS (ESI) *m/z* calcd for C<sub>28</sub>H<sub>22</sub>NO<sub>3</sub>S<sub>2</sub> [M+H]<sup>+</sup> 484.1041, found 484.1053.

*N*-((5-oxo-11-(*p*-tolyl)-5,6-dihydro-6aH-benzo[*a*]fluoren-6a-yl)methyl)benzenesulfonamide(**3ba**)

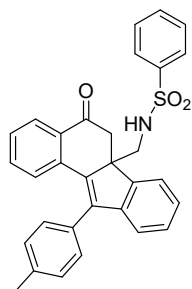

White solid. 59.5 mg. Yield: 61%. Purification by column chromatography (EtOAc/Pe, 1:6 v/v). mp 188-189°C. <sup>1</sup>H NMR (400 MHz, CDCl<sub>3</sub>) δ 8.06 – 8.00 (m, 1H), 7.53 – 7.43 (m, 3H), 7.36 – 7.18 (m, 13H), 7.07 (dd, *J* = 4.3, 2.4 Hz, 1H), 4.11 – 4.06 (m, 1H), 3.48 (dd, *J* = 12.4, 5.7 Hz, 1H), 3.28 – 3.19 (m, 2H), 2.53 (d, *J* = 16.8 Hz, 1H), 2.45 (s, 3H). <sup>13</sup>C {<sup>1</sup>H} NMR (100 MHz, CDCl<sub>3</sub>) δ 196.1, 146.7, 145.7, 141.3, 139.3, 138.2, 137.7, 134.9, 133.8, 132.5, 130.7, 130.1, 129.8, 129.0, 128.9, 128.5, 128.1, 127.7, 127.5, 126.8, 126.7, 122.1, 121.7, 55.3, 47.7, 45.8, 21.5. HRMS (ESI) *m/z* calcd for C<sub>31</sub>H<sub>26</sub>NO<sub>3</sub>S [M+H]<sup>+</sup> 492.1633, found 492.1639.

*N*-((11-(4-methoxyphenyl)-5-oxo-5,6-dihydro-6aH-benzo[*a*]fluoren-6a-yl)methyl)benzenesulfonamide(**3bb**)

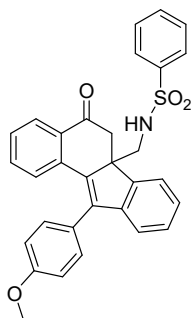

White solid. 48.2 mg. Yield: 47%. Purification by column chromatography (EtOAc/Pe, 1:6 v/v). mp 174-175°C. <sup>1</sup>H NMR (400 MHz, CDCl<sub>3</sub>) δ 8.05 – 8.00 (m, 1H), 7.51 – 7.43 (m, 3H), 7.35 – 7.26 (m, 8H), 7.25 – 7.19 (m, 2H), 7.11 – 7.06 (m, 1H), 7.01 (d, *J* = 8.8 Hz, 2H), 4.11 (t, *J* = 6.2 Hz, 1H), 3.89 (s, 3H), 3.48 (dd, *J* = 12.4, 5.8 Hz, 1H), 3.28 – 3.16 (m, 2H), 2.52 (d, *J* = 16.8 Hz, 1H). <sup>13</sup>C {<sup>1</sup>H} NMR (100 MHz, CDCl<sub>3</sub>) δ 196.1, 159.6, 146.7, 145.7, 141.0, 139.3, 137.7, 135.0, 133.8, 132.5, 130.3, 130.1, 129.0, 128.5, 128.1, 127.6, 127.5, 126.8, 126.7, 125.9, 122.0, 121.8, 114.5, 55.4, 55.2, 47.7, 45.8. HRMS (ESI) *m/z* calcd for C<sub>31</sub>H<sub>26</sub>NO<sub>4</sub>S [M+H]<sup>+</sup> 508.1583, found 508.1587.

*N*-((11-(4-(*tert*-butyl)phenyl)-5-oxo-5,6-dihydro-6aH-benzo[*a*]fluoren-6a-yl)methyl)benzenesulfonamide(**3bc**)

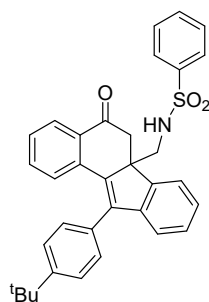

White solid. 63.3 mg. Yield: 59%. mp 195-197°C. <sup>1</sup>H NMR (400 MHz, CDCl<sub>3</sub>) δ 8.05 – 8.00 (m, 1H), 7.50 – 7.44 (m, 5H), 7.35 – 7.24 (m, 9H), 7.23 – 7.17 (m, 1H), 7.12 – 7.08 (m, 1H), 4.22 (t, *J* = 5.9 Hz, 1H), 3.47 (dd, *J* = 12.4, 5.8 Hz, 1H), 3.30 – 3.17 (m, 2H), 2.53 (d, *J* = 16.8 Hz, 1H), 1.39 (s, 9H). <sup>13</sup>C {<sup>1</sup>H} NMR (100 MHz, CDCl<sub>3</sub>) δ 196.2, 151.4, 146.7, 145.7, 141.3, 139.3, 137.7, 135.0, 133.8, 132.5, 130.7, 130.1, 129.0, 128.7, 128.5, 128.1, 127.7, 127.5, 126.8, 126.7, 125.9, 122.2, 121.8, 55.3, 47.7, 45.8, 34.8, 31.4. HRMS (ESI) *m/z* calcd for C<sub>34</sub>H<sub>32</sub>NO<sub>3</sub>S [M+H]<sup>+</sup> 534.2103, found 534.2108.

*N*-((11-(4-fluorophenyl)-5-oxo-5,6-dihydro-6aH-benzo[*a*]fluoren-6a-yl)methyl)benzenesulfonamide (**3bd**)

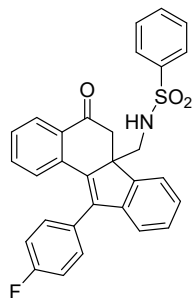

White solid. 62.2 mg. Yield: 63%. Purification by column chromatography (EtOAc/Pe, 1:6 v/v). mp 226-228°C. <sup>1</sup>H NMR (400 MHz, CDCl<sub>3</sub>) δ 8.06 – 8.01 (m, 1H), 7.51 – 7.44 (m, 3H), 7.40 – 7.29 (m, 7H), 7.29 – 7.14 (m, 5H), 7.03 – 6.98 (m, 1H), 4.19 (t, *J* = 6.2 Hz, 1H), 3.48 (dd, *J* = 12.5, 5.7 Hz, 1H), 3.30 – 3.17 (m, 2H), 2.52 (d, *J* = 16.8 Hz, 1H). <sup>13</sup>C {<sup>1</sup>H} NMR (100 MHz, CDCl<sub>3</sub>) δ 195.9, 162.7 (d, *J* = 247.9 Hz), 146.6, 145.4, 140.2, 139.3, 138.5, 134.6, 133.9, 132.6, 130.9, 130.9, 130.1, 129.8 (d, *J* = 3.5 Hz), 129.0, 128.6, 128.4, 127.6 (d, *J* = 8.7 Hz), 126.9, 126.8, 121.9, 121.8, 116.3 (d, *J* = 21.4 Hz), 55.4, 47.7, 45.8. <sup>19</sup>F NMR (376 MHz, CDCl<sub>3</sub>) δ -112.81 (s). HRMS (ESI) *m/z* calcd for C<sub>30</sub>H<sub>23</sub>FNO<sub>3</sub>S [M+H]<sup>+</sup> 496.1383, found 496.1393.

*N*-((11-(4-chlorophenyl)-5-oxo-5,6-dihydro-6aH-benzo[*a*]fluoren-6a-yl)methyl)benzenesulfonamide (**3be**)

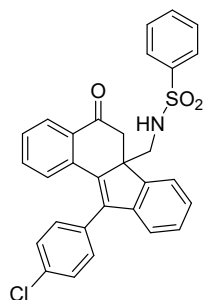

White solid. 63.7 mg. Yield: 62%. Purification by column chromatography (EtOAc/Pe, 1:6 v/v). mp 223-225°C. <sup>1</sup>H NMR (400 MHz, CDCl<sub>3</sub>) δ 8.05 – 8.00 (m, 1H), 7.45 (dd, *J* = 14.2, 8.2 Hz, 5H), 7.35 – 7.26 (m, 8H), 7.20 (dd, *J* = 16.8, 7.4 Hz, 2H), 7.01 (dd, *J* = 6.6, 2.3 Hz, 1H), 4.38 (t, *J* = 6.2 Hz, 1H), 3.47 (dd, *J* = 12.5, 5.9 Hz, 1H), 3.28 – 3.16 (m, 2H), 2.50 (d, *J* = 16.8 Hz, 1H). <sup>13</sup>C {<sup>1</sup>H} NMR (100 MHz, CDCl<sub>3</sub>) δ 195.9, 146.7, 145.1, 139.9, 139.3, 138.7, 134.5, 134.3, 133.9, 132.5, 132.4, 130.5, 130.1, 129.4, 129.0, 128.6, 128.4, 127.6, 127.6, 126.9, 126.8, 121.9, 121.7, 55.5, 47.7, 45.8. HRMS (ESI) *m/z* calcd for C<sub>30</sub>H<sub>23</sub>ClNO<sub>3</sub>S [M+H]<sup>+</sup> 512.1087, found 512.1082.

*N*-((5-oxo-11-(4-(trifluoromethyl)phenyl)-5,6-dihydro-6aH-benzo[*a*]fluoren-6a-yl)methyl)benzenesulfonamide(**3bf**)

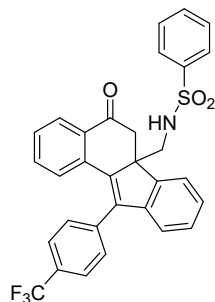

White solid. 88.7 mg. Yield: 81%. Purification by column chromatography (EtOAc/Pe, 1:6 v/v). mp 203-205°C. <sup>1</sup>H NMR (400 MHz, CDCl<sub>3</sub>) δ 8.02 (dd, *J* = 7.6, 1.5 Hz, 1H), 7.71 (d, *J* = 8.1 Hz, 2H), 7.57 – 7.41 (m, 5H), 7.36 – 7.26 (m, 6H), 7.20 (dd, *J* = 10.8, 3.9 Hz, 1H), 7.17 – 7.11 (m, 1H), 6.95 (dd, *J* = 7.6, 1.0 Hz, 1H), 4.60 (q, *J* = 6.0 Hz, 1H), 3.49 (dd, *J* = 12.6, 6.1 Hz, 1H), 3.31 – 3.13 (m, 2H), 2.51 (d, *J* = 16.8 Hz, 1H). <sup>13</sup>C {<sup>1</sup>H} NMR (100 MHz, CDCl<sub>3</sub>) δ 195.8, 146.78, 144.9, 139.7, 139.4, 139.2, 137.9, 134.3, 134.0, 132.5, 130.4 (q, *J* = 32.7 Hz), 130.2, 129.6, 129.0, 128.6, 127.7, 127.6, 127.0, 126.8, 126.1, 126.1, 126.0, 126.0, 124.1 (q, *J* = 272.8 Hz), 122.0, 121.7, 55.7, 47.8, 45.8. <sup>19</sup>F NMR (376 MHz, CDCl<sub>3</sub>) δ -62.45 (s). HRMS (ESI) *m/z* calcd for C<sub>31</sub>H<sub>23</sub>F<sub>3</sub>NO<sub>3</sub>S [M+H]<sup>+</sup> 546.1351, found 546.1366.

*N*-((5-oxo-11-(*m*-tolyl)-5,6-dihydro-6aH-benzo[*a*]fluoren-6a-yl)methyl)benzenesulfonamide(**3bg**)

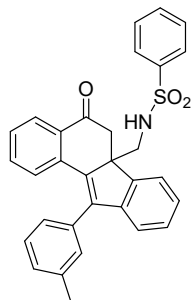

White solid. 58.5 mg. Yield: 60%. Purification by column chromatography (EtOAc/Pe, 1:6 v/v). mp 196-198°C. <sup>1</sup>H NMR (400 MHz, CDCl<sub>3</sub>) δ 8.06 – 8.00 (m, 1H), 7.52 – 7.43 (m, 3H), 7.39 – 7.26 (m, 7H), 7.25 – 7.13 (m, 4H), 7.07 – 7.02 (m, 1H), 4.17 – 4.07 (m, 1H), 3.48 (dd, *J* = 12.4, 5.8 Hz, 1H), 3.29 – 3.18 (m, 2H), 2.54 (d, *J* = 16.7 Hz, 1H), 2.40 (s, 3H). <sup>13</sup>C {<sup>1</sup>H} NMR (100 MHz, CDCl<sub>3</sub>) δ 196.1, 146.7, 145.6, 141.5, 139.3, 138.8, 137.8, 134.9, 133.8, 132.5, 130.1, 129.5, 129.1, 129.0, 128.5, 128.2, 127.7, 127.5, 126.8, 126.7, 126.0, 122.1, 121.7, 55.3, 47.7, 45.8, 21.5. HRMS (ESI) *m/z* calcd for C<sub>31</sub>H<sub>26</sub>NO<sub>3</sub>S [M+H]<sup>+</sup> 492.1633, found 492.1637.

*N*-((11-(2-chlorophenyl)-5-oxo-5,6-dihydro-6aH-benzo[*a*]fluoren-6a-yl)methyl)benzenesulfonamide (**3bh**)

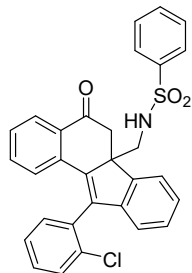

White solid. 64.3 mg. Yield: 63%. Purification by column chromatography (EtOAc/Pe, 1:6 v/v). mp 180-181°C. <sup>1</sup>H NMR (400 MHz, CDCl<sub>3</sub>) δ 8.04 (dd, *J* = 7.6, 1.5 Hz, 1H), 7.64 – 7.59 (m, 1H), 7.55 – 7.41 (m, 6H), 7.36 – 7.22 (m, 7H), 7.06 (d, *J* = 7.5 Hz, 1H), 6.96 – 6.91 (m, 1H), 4.08 (t, *J* = 6.1 Hz, 1H), 3.50 (dd, *J* = 12.5, 5.3 Hz, 1H), 3.40 – 3.11 (m, 1H), 2.58 (d, *J* = 16.5 Hz, 1H). <sup>13</sup>C {<sup>1</sup>H} NMR (100 MHz, CDCl<sub>3</sub>) δ 196.0, 146.5, 145.3, 140.3, 139.4, 138.2, 135.3, 134.2, 132.8, 132.7, 132.6, 131.6, 130.5, 129.9, 129.4, 129.0, 128.7, 128.5, 127.5, 127.2, 126.9, 126.8, 126.4, 121.8, 121.7, 55.8, 47.8, 46.2. HRMS (ESI) *m/z* calcd for C<sub>30</sub>H<sub>23</sub>ClNO<sub>3</sub>S [M+H]<sup>+</sup> 512.1087, found 512.1084.

*N*-((9-methyl-5-oxo-11-phenyl-5,6-dihydro-6aH-benzo[*a*]fluoren-6a-yl)methyl)benzenesulfonamide (**3bi**)

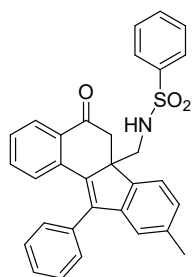

White solid. 63.7 mg. Yield: 65%. Purification by column chromatography (EtOAc/Pe, 1:6 v/v). mp 248-250°C. <sup>1</sup>H NMR (400 MHz, CDCl<sub>3</sub>) δ 8.03 (dd, *J* = 7.6, 1.5 Hz, 1H), 7.53 – 7.44 (m, 6H), 7.38 (d, *J* = 6.6 Hz, 2H), 7.35 – 7.23 (m, 4H), 7.16 (d, *J* = 7.5 Hz, 1H), 7.08 – 6.97 (m, 3H), 4.00 (t, *J* = 6.2 Hz, 1H), 3.46 (dd, *J* = 12.4, 5.4 Hz, 1H), 3.30 – 3.16 (m, 2H), 2.54 (d, *J* = 16.7 Hz, 1H), 2.35 (s, 3H). <sup>13</sup>C {<sup>1</sup>H} NMR (100 MHz, CDCl<sub>3</sub>) δ 196.1, 145.8, 143.8, 141.3, 139.4, 138.6, 138.3, 134.8, 134.0, 133.8, 132.5, 130.1, 129.1, 129.0, 129.0, 128.4, 128.1, 127.6, 127.6, 127.6, 126.8, 122.7, 121.5, 55.0, 47.8, 46.0, 21.6. HRMS (ESI) *m/z* calcd for C<sub>31</sub>H<sub>26</sub>NO<sub>3</sub>S [M+H]<sup>+</sup> 492.1633, found 492.1635.

*N*-((9-fluoro-5-oxo-11-phenyl-5,6-dihydro-6aH-benzo[*a*]fluoren-6a-yl)methyl)benzenesulfonamide (**3bj**)

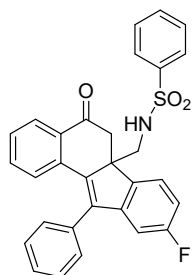

White solid. 92.3 mg. Yield: 93%. Purification by column chromatography (EtOAc/Pe, 1:6 v/v). mp 223-225°C. <sup>1</sup>H NMR (400 MHz, CDCl<sub>3</sub>) δ 8.05 (dd, *J* = 7.7, 1.4 Hz, 1H), 7.49 (dt, *J* = 7.3, 6.7 Hz, 6H),

7.40 – 7.27 (m, 6H), 7.20 (dd,  $J = 8.2, 4.8$  Hz, 1H), 7.04 (dd,  $J = 7.6, 1.0$  Hz, 1H), 6.88 (dd,  $J = 13.5, 5.7$  Hz, 2H), 4.11 (t,  $J = 6.3$  Hz, 1H), 3.48 (dd,  $J = 12.7, 6.2$  Hz, 1H), 3.29 – 3.16 (m, 2H), 2.54 (d,  $J = 16.8$  Hz, 1H).  $^{13}\text{C}$  { $^1\text{H}$ } NMR (100 MHz,  $\text{CDCl}_3$ )  $\delta$  195.6, 163.4 (d,  $J = 246.1$  Hz), 147.7, 147.6, 142.2, 142.1, 140.5, 140.5, 140.0, 139.4, 134.4, 133.9, 133.3, 132.6, 130.1, 129.3, 129.0, 128.9, 128.7 (d,  $J = 4.4$  Hz), 127.6, 126.8, 122.8 (d,  $J = 9.2$  Hz), 113.4 (d,  $J = 23.4$  Hz), 109.3 (d,  $J = 24.0$  Hz), 55.0, 47.7, 45.8.  $^{19}\text{F}$  NMR (376 MHz,  $\text{CDCl}_3$ )  $\delta$  -113.00 (s). HRMS (ESI)  $m/z$  calcd for  $\text{C}_{30}\text{H}_{23}\text{FNO}_3\text{S}$   $[\text{M}+\text{H}]^+$  496.1383, found 496.1389.

*N*-((9-chloro-5-oxo-11-phenyl-5,6-dihydro-6aH-benzo[*a*]fluoren-6a-yl)methyl)benzenesulfonamide(**3bk**)

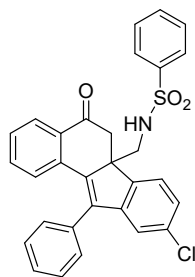

White solid. 72.6 mg. Yield: 71%. Purification by column chromatography (EtOAc/Pe, 1:6 v/v). mp 246-247°C.  $^1\text{H}$  NMR (400 MHz,  $\text{CDCl}_3$ )  $\delta$  8.05 (dd,  $J = 7.6, 1.3$  Hz, 1H), 7.50 (d,  $J = 7.5$  Hz, 6H), 7.39 – 7.28 (m, 6H), 7.20 – 7.12 (m, 3H), 7.07 – 7.02 (m, 1H), 4.10 (t,  $J = 6.4$  Hz, 1H), 3.49 (dd,  $J = 12.8, 6.4$  Hz, 1H), 3.30 – 3.17 (m, 2H), 2.53 (d,  $J = 16.8$  Hz, 1H).  $^{13}\text{C}$  { $^1\text{H}$ } NMR (100 MHz,  $\text{CDCl}_3$ )  $\delta$  195.5, 147.2, 145.0, 140.4, 139.6, 139.4, 134.7, 134.3, 133.9, 133.2, 132.6, 130.1, 129.3, 129.0, 128.9, 128.7, 127.7, 127.7, 126.7, 126.6, 122.7, 122.1, 55.2, 47.6, 45.5. HRMS (ESI)  $m/z$  calcd for  $\text{C}_{30}\text{H}_{23}\text{ClNO}_3\text{S}$   $[\text{M}+\text{H}]^+$  512.1087, found 512.1089.

*N*-((3-fluoro-5-oxo-11-phenyl-5,6-dihydro-6aH-benzo[*a*]fluoren-6a-yl)methyl)benzenesulfonamide(**3bl**)

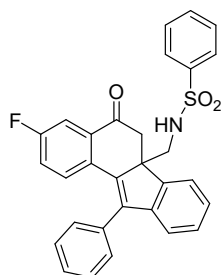

White solid. 67.9 mg. Yield: 69%. Purification by column chromatography (EtOAc/Pe, 1:6 v/v). mp 178-180°C.  $^1\text{H}$  NMR (400 MHz,  $\text{CDCl}_3$ )  $\delta$  7.68 (dd,  $J = 8.9, 2.6$  Hz, 1H), 7.54 – 7.43 (m, 6H), 7.41 – 7.29 (m, 5H), 7.28 – 7.20 (m, 3H), 7.05 – 6.93 (m, 2H), 4.11 (t,  $J = 6.3$  Hz, 1H), 3.47 (dd,  $J = 12.5, 5.5$  Hz, 1H), 3.30 – 3.17 (m, 2H), 2.54 (d,  $J = 16.8$  Hz, 1H).  $^{13}\text{C}$  { $^1\text{H}$ } NMR (100 MHz,  $\text{CDCl}_3$ )  $\delta$  195.1, 162.2 (d,  $J = 250.8$  Hz), 146.3, 145.5, 141.1, 139.4, 137.1, 133.7, 132.6, 132.1, 132.0, 131.2 (d,  $J = 3.1$  Hz), 129.9 (d,  $J = 7.3$  Hz), 129.2, 129.0 (d,  $J = 6.8$  Hz), 128.7, 128.5, 126.8, 126.8, 122.1, 121.8, 121.5 (d,  $J = 22.6$  Hz), 113.6 (d,  $J = 22.5$  Hz), 55.4, 47.8, 45.6.  $^{19}\text{F}$  NMR (376 MHz,  $\text{CDCl}_3$ )  $\delta$  -110.71 (s). HRMS (ESI)  $m/z$  calcd for  $\text{C}_{30}\text{H}_{23}\text{FNO}_3\text{S}$   $[\text{M}+\text{H}]^+$  496.1383, found 496.1380.

*N*-((3-chloro-5-oxo-11-phenyl-5,6-dihydro-6aH-benzo[*a*]fluoren-6a-yl)methyl)benzenesulfonamide(**3bm**)

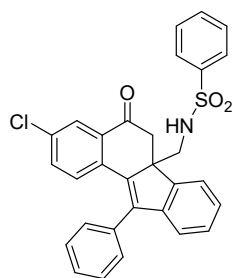

White solid. 72.1 mg. Yield: 70%. Purification by column chromatography (EtOAc/Pe, 1:6 v/v). mp 200-202°C.  $^1\text{H}$  NMR (400 MHz,  $\text{CDCl}_3$ )  $\delta$  7.97 (d,  $J = 2.3$  Hz, 1H), 7.53 – 7.44 (m, 6H), 7.39 – 7.27 (m, 6H), 7.26 – 7.17 (m, 3H), 6.95 (d,  $J = 8.5$  Hz, 1H), 4.19 (t,  $J = 6.2$  Hz, 1H), 3.48 (dd,  $J = 12.6, 5.6$  Hz, 1H), 3.29 – 3.16 (m, 2H), 2.52 (d,  $J = 16.8$  Hz, 1H).  $^{13}\text{C}$   $\{^1\text{H}\}$  NMR (100 MHz,  $\text{CDCl}_3$ )  $\delta$  194.9, 146.5, 145.4, 141.9, 139.3, 137.0, 134.4, 133.8, 133.6, 133.2, 132.6, 131.2, 129.2, 129.1, 129.0, 128.9, 128.7, 128.6, 127.4, 127.0, 126.8, 122.2, 121.8, 55.2, 47.7, 45.6. HRMS (ESI)  $m/z$  calcd for  $\text{C}_{30}\text{H}_{23}\text{ClNO}_3\text{S}$   $[\text{M}+\text{H}]^+$  512.1087, found 512.1091.

*N*-((3-methoxy-5-oxo-11-phenyl-5,6-dihydro-6aH-benzo[a]fluoren-6a-yl)methyl)benzenesulfonamide (**3bn**)

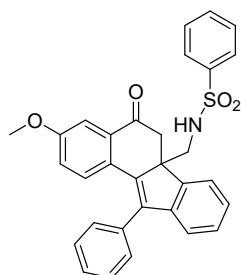

White solid. 70.7 mg. Yield: 70%. Purification by column chromatography (EtOAc/Pe, 1:6 v/v). mp 200-202°C.  $^1\text{H}$  NMR (400 MHz,  $\text{CDCl}_3$ )  $\delta$  7.52 – 7.42 (m, 7H), 7.40 – 7.23 (m, 6H), 7.22 – 7.15 (m, 2H), 6.95 (d,  $J = 8.7$  Hz, 1H), 6.83 (dd,  $J = 8.7, 2.8$  Hz, 1H), 4.24 (t,  $J = 6.2$  Hz, 1H), 3.83 (s, 3H), 3.48 (dd,  $J = 12.4, 5.9$  Hz, 1H), 3.28 – 3.16 (m, 2H), 2.52 (d,  $J = 16.8$  Hz, 1H).  $^{13}\text{C}$   $\{^1\text{H}\}$  NMR (100 MHz,  $\text{CDCl}_3$ )  $\delta$  196.1, 159.5, 146.4, 145.7, 139.4, 138.0, 134.1, 132.5, 131.5, 129.2, 129.1, 129.1, 129.0, 128.5, 128.3, 127.9, 126.8, 126.4, 122.2, 121.8, 121.6, 109.5, 55.6, 55.3, 48.0, 45.7. HRMS (ESI)  $m/z$  calcd for  $\text{C}_{31}\text{H}_{26}\text{NO}_4\text{S}$   $[\text{M}+\text{H}]^+$  508.1583, found 508.1587.

*N*-((2-methyl-5-oxo-11-phenyl-5,6-dihydro-6aH-benzo[a]fluoren-6a-yl)methyl)benzenesulfonamide (**3bo**)

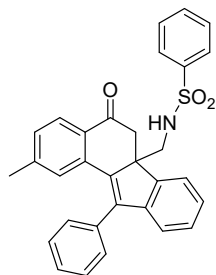

White solid. 58.4 mg. Yield: 59%. Purification by column chromatography (EtOAc/Pe, 1:6 v/v). mp 191-193°C.  $^1\text{H}$  NMR (400 MHz,  $\text{CDCl}_3$ )  $\delta$  7.92 (d,  $J = 8.0$  Hz, 1H), 7.52 – 7.43 (m, 6H), 7.41 – 7.35 (m, 2H), 7.32 (dd,  $J = 11.0, 4.5$  Hz, 3H), 7.27 – 7.18 (m, 3H), 7.11 (dd,  $J = 8.0, 1.0$  Hz, 1H), 6.77 (s,

1H), 4.14 (t,  $J = 6.2$  Hz, 1H), 3.48 (dd,  $J = 12.4, 5.7$  Hz, 1H), 3.30 – 3.15 (m, 2H), 2.51 (d,  $J = 16.7$  Hz, 1H), 2.12 (s, 3H).  $^{13}\text{C}$   $\{^1\text{H}\}$  NMR (100 MHz,  $\text{CDCl}_3$ )  $\delta$  195.8, 146.7, 145.45, 144.5, 141.0, 139.3, 138.3, 134.7, 133.9, 132.4, 129.4, 129.0, 129.0, 128.9, 128.5, 128.4, 128.0, 127.9, 127.6, 126.9, 126.7, 122.0, 121.8, 55.4, 47.8, 45.8, 21.9. HRMS (ESI)  $m/z$  calcd for  $\text{C}_{31}\text{H}_{26}\text{NO}_3\text{S}$   $[\text{M}+\text{H}]^+$  492.1633, found 492.1630.

*N*-((2-fluoro-5-oxo-11-phenyl-5,6-dihydro-6aH-benzo[*a*]fluoren-6a-yl)methyl)benzenesulfonamide(**3bp**)

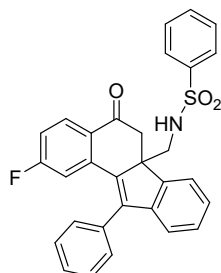

White solid. 65.5 mg. Yield: 66%. Purification by column chromatography (EtOAc/Pe, 1:6 v/v). mp 193-195°C.  $^1\text{H}$  NMR (400 MHz,  $\text{CDCl}_3$ )  $\delta$  8.04 (dd,  $J = 8.8, 6.0$  Hz, 1H), 7.48 (dt,  $J = 14.2, 7.4$  Hz, 6H), 7.39 – 7.28 (m, 6H), 7.27 – 7.20 (m, 2H), 6.94 (td,  $J = 8.4, 2.5$  Hz, 1H), 6.54 (dd,  $J = 9.8, 2.5$  Hz, 1H), 4.33 (dd,  $J = 7.0, 5.5$  Hz, 1H), 3.51 (dd,  $J = 12.6, 5.3$  Hz, 1H), 3.29 – 3.16 (m, 2H), 2.50 (d,  $J = 16.8$  Hz, 1H).  $^{13}\text{C}$   $\{^1\text{H}\}$  NMR (100 MHz,  $\text{CDCl}_3$ )  $\delta$  194.7, 165.6 (d,  $J = 255.7$  Hz), 146.6, 145.3, 142.7, 139.4, 137.5 (d,  $J = 10.2$  Hz), 137.0 (d,  $J = 2.3$  Hz), 133.3, 132.6, 130.7 (d,  $J = 10.1$  Hz), 129.3, 129.0, 128.8, 128.7, 128.7, 127.2, 126.8, 126.7, 126.7, 122.3, 121.9, 115.9 (d,  $J = 22.6$  Hz), 113.8 (d,  $J = 23.3$  Hz), 55.5, 47.7, 45.6.  $^{19}\text{F}$  NMR (376 MHz,  $\text{CDCl}_3$ )  $\delta$  -102.26 (s). HRMS (ESI)  $m/z$  calcd for  $\text{C}_{30}\text{H}_{23}\text{FNO}_3\text{S}$   $[\text{M}+\text{H}]^+$  496.1383, found 496.1385.

*N*-((4-oxo-10-phenyl-4,5-dihydro-5aH-fluoreno[2,1-*b*]thiophen-5a-yl)methyl)benzenesulfonamide(**3bq**)

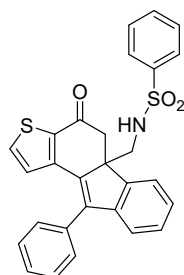

White solid. 82.5 mg. Yield: 85%. Purification by column chromatography (EtOAc/Pe, 1:6 v/v). mp 188-189°C.  $^1\text{H}$  NMR (400 MHz,  $\text{CDCl}_3$ )  $\delta$  7.56 – 7.41 (m, 9H), 7.38 – 7.22 (m, 6H), 6.71 (d,  $J = 5.1$  Hz, 1H), 4.24 (t,  $J = 6.4$  Hz, 1H), 3.48 (dd,  $J = 12.6, 5.7$  Hz, 1H), 3.35 (dd,  $J = 12.6, 7.4$  Hz, 1H), 3.16 (d,  $J = 16.5$  Hz, 1H), 2.58 (d,  $J = 16.5$  Hz, 1H).  $^{13}\text{C}$   $\{^1\text{H}\}$  NMR (100 MHz,  $\text{CDCl}_3$ )  $\delta$  190.5, 146.7, 145.5, 142.7, 141.0, 139.6, 136.1, 136.1, 134.8, 133.5, 132.6, 129.1, 129.0, 128.9, 128.7, 127.0, 126.8, 126.3, 122.3, 122.1, 57.1, 49.2, 45.1. HRMS (ESI)  $m/z$  calcd for  $\text{C}_{28}\text{H}_{22}\text{NO}_3\text{S}_2$   $[\text{M}+\text{H}]^+$  484.1041, found 484.1050.

11-Phenyl-6a-((piperidin-1-ylsulfonyl)methyl)-6,6a-dihydro-5H-benzo[*a*]fluoren-5-one (**5a**)

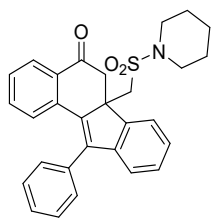

White solid. 78.9 mg. Yield: 84%. Purification by column chromatography (EtOAc/Pe, 1:8 v/v). mp 177-179°C. <sup>1</sup>H NMR (400 MHz, CDCl<sub>3</sub>) δ 8.15 – 8.05 (m, 1H), 7.72 – 7.63 (m, 1H), 7.53 – 7.39 (m, 5H), 7.38 – 7.31 (m, 4H), 7.30 – 7.24 (m, 1H), 7.24 – 7.17 (m, 1H), 3.60 (d, *J* = 14.4 Hz, 1H), 3.51 (d, *J* = 16.5 Hz, 1H), 3.22 (d, *J* = 14.4 Hz, 1H), 2.84 (dd, *J* = 11.3, 6.4 Hz, 2H), 2.70 (dd, *J* = 12.4, 5.1 Hz, 2H), 2.48 (d, *J* = 16.5 Hz, 1H), 1.48 – 1.32 (m, 4H). <sup>13</sup>C {<sup>1</sup>H} NMR (100 MHz, CDCl<sub>3</sub>) δ 196.2, 147.5, 145.3, 140.0, 139.3, 135.8, 134.0, 133.9, 129.8, 129.0, 128.4, 128.3, 128.1, 127.4, 126.4, 122.8, 54.0, 53.5, 48.6, 45.9, 25.5, 23.7. HRMS (ESI) *m/z* calcd for C<sub>29</sub>H<sub>28</sub>NO<sub>3</sub>S [M+H]<sup>+</sup> 470.1790, found 470.1799.

6a-((Piperidin-1-ylsulfonyl)methyl)-11-(p-tolyl)-6,6a-dihydro-5H-benzo[a]fluoren-5-one (**5b**)

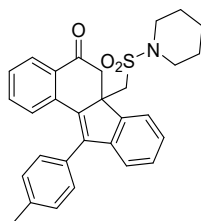

White solid. 60.0 mg. Yield: 62%. Purification by column chromatography (EtOAc/Pe, 1:8 v/v). mp 202-203°C. <sup>1</sup>H NMR (400 MHz, CDCl<sub>3</sub>) δ 8.17 – 8.04 (m, 1H), 7.66 (dd, *J* = 5.8, 2.7 Hz, 1H), 7.40 – 7.32 (m, 4H), 7.30 – 7.24 (m, 6H), 3.57 (d, *J* = 14.4 Hz, 1H), 3.50 (d, *J* = 16.5 Hz, 1H), 3.21 (d, *J* = 14.4 Hz, 1H), 2.84 (dd, *J* = 11.1, 6.3 Hz, 2H), 2.70 (dd, *J* = 12.2, 5.1 Hz, 2H), 2.51 – 2.40 (m, 4H), 1.45 – 1.36 (m, 6H). <sup>13</sup>C {<sup>1</sup>H} NMR (100 MHz, CDCl<sub>3</sub>) δ 196.3, 147.5, 145.4, 140.1, 139.0, 138.0, 136.0, 133.9, 130.9, 129.8, 129.7, 128.9, 128.3, 128.3, 128.0, 127.4, 126.4, 122.8, 122.0, 54.0, 53.4, 48.6, 45.9, 25.5, 23.7, 21.5. HRMS (ESI) *m/z* calcd for C<sub>30</sub>H<sub>30</sub>NO<sub>3</sub>S [M+H]<sup>+</sup> 484.1946, found 484.1946.

11-(4-Methoxyphenyl)-6a-((piperidin-1-ylsulfonyl)methyl)-6,6a-dihydro-5H-benzo[a]fluoren-5-one (**5c**)

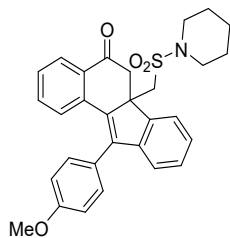

White solid. 64.0 mg. Yield: 64%. Purification by column chromatography (EtOAc/Pe, 1:8 v/v). mp 190-192°C. <sup>1</sup>H NMR (400 MHz, CDCl<sub>3</sub>) δ 8.10 (dd, *J* = 7.6, 1.4 Hz, 1H), 7.73 – 7.59 (m, 1H), 7.42 – 7.32 (m, 6H), 7.31 – 7.26 (m, 2H), 7.01 (d, *J* = 8.8 Hz, 2H), 3.89 (s, 3H), 3.57 (d, *J* = 14.4 Hz, 1H), 3.50 (d, *J* = 16.5 Hz, 1H), 3.20 (d, *J* = 14.4 Hz, 1H), 2.84 (dd, *J* = 11.2, 6.4 Hz, 2H), 2.70 (dd, *J* = 12.3, 5.0 Hz, 2H), 2.47 (d, *J* = 16.5 Hz, 1H), 1.45 – 1.37 (m, 6H). <sup>13</sup>C {<sup>1</sup>H} NMR (100 MHz, CDCl<sub>3</sub>) δ 196.3, 159.5, 147.5, 145.5, 139.7, 138.9, 136.0, 133.9, 130.3, 129.8, 128.3, 128.2, 128.0, 127.4, 126.4, 126.0,

122.8, 121.9, 114.4, 55.3, 54.0, 53.3, 48.5, 45.9, 25.5, 23.7. HRMS (ESI)  $m/z$  calcd for  $C_{30}H_{30}NO_4S$   $[M+H]^+$  500.1896, found 500.1999.

11-(4-(Tert-butyl)phenyl)-6a-((piperidin-1-ylsulfonyl)methyl)-6,6a-dihydro-5H-benzo[a]fluoren-5-one (5d)

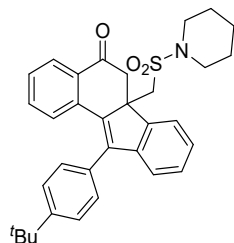

White solid. 65.2 mg. Yield: 62%. Purification by column chromatography (EtOAc/Pe, 1:8 v/v). mp 180-181°C.  $^1H$  NMR (400 MHz,  $CDCl_3$ )  $\delta$  8.13 – 8.06 (m, 1H), 7.69 – 7.62 (m, 1H), 7.48 (d,  $J$  = 8.2 Hz, 2H), 7.41 – 7.27 (m, 8H), 3.58 (d,  $J$  = 14.5 Hz, 1H), 3.50 (d,  $J$  = 16.5 Hz, 1H), 3.21 (d,  $J$  = 14.4 Hz, 1H), 2.89 – 2.79 (m, 2H), 2.75 – 2.64 (m, 2H), 2.48 (d,  $J$  = 16.5 Hz, 1H), 1.42 – 1.39 (m, 15H).  $^{13}C$   $\{^1H\}$  NMR (100 MHz,  $CDCl_3$ )  $\delta$  196.3, 151.2, 147.6, 145.5, 140.0, 138.9, 136.0, 133.9, 130.8, 129.8, 128.6, 128.3, 128.3, 128.0, 127.3, 126.3, 125.8, 122.8, 122.1, 54.1, 53.5, 48.6, 45.9, 34.8, 31.4, 25.5, 23.7. HRMS (ESI)  $m/z$  calcd for  $C_{33}H_{36}NO_3S$   $[M+H]^+$  526.2416, found 526.2412.

11-(4-Fluorophenyl)-6a-((piperidin-1-ylsulfonyl)methyl)-6,6a-dihydro-5H-benzo[a]fluoren-5-one (5e)

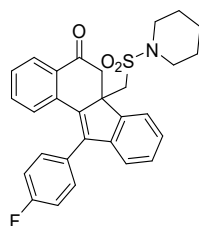

White solid. 57.5 mg. Yield: 59%. Purification by column chromatography (EtOAc/Pe, 1:8 v/v). mp 179-180°C.  $^1H$  NMR (400 MHz,  $CDCl_3$ )  $\delta$  8.15 – 8.04 (m, 1H), 7.65 (dd,  $J$  = 5.8, 2.7 Hz, 1H), 7.48 – 7.32 (m, 6H), 7.26 – 7.14 (m, 4H), 3.57 (d,  $J$  = 14.4 Hz, 1H), 3.48 (d,  $J$  = 16.5 Hz, 1H), 3.21 (d,  $J$  = 14.4 Hz, 1H), 2.83 (dd,  $J$  = 11.2, 6.4 Hz, 2H), 2.70 (dd,  $J$  = 12.3, 5.0 Hz, 2H), 2.48 (d,  $J$  = 16.5 Hz, 1H), 1.41 (d,  $J$  = 6.1 Hz, 6H).  $^{13}C$   $\{^1H\}$  NMR (100 MHz,  $CDCl_3$ )  $\delta$  196.1, 162.7 (d,  $J$  = 247.5 Hz), 147.4, 145.2, 139.6, 139.0, 135.7, 134.0, 130.9 (d,  $J$  = 8.0 Hz), 129.9 (d,  $J$  = 3.5 Hz), 129.8, 128.4, 128.2, 128.1, 127.5, 126.5, 122.8, 121.8, 116.2 (d,  $J$  = 21.6 Hz), 53.9, 53.5, 48.6, 45.9, 25.5, 23.7.  $^{19}F$  NMR (376 MHz,  $CDCl_3$ )  $\delta$  -113.11 (s). HRMS (ESI)  $m/z$  calcd for  $C_{29}H_{27}FNO_3S$   $[M+H]^+$  488.1696, found 488.1699.

11-(4-Chlorophenyl)-6a-((piperidin-1-ylsulfonyl)methyl)-6,6a-dihydro-5H-benzo[a]fluoren-5-one (**5f**)

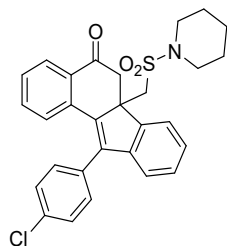

White solid. 75.6 mg. Yield: 75%. Purification by column chromatography (EtOAc/Pe, 1:8 v/v). mp 180-181°C. <sup>1</sup>H NMR (400 MHz, CDCl<sub>3</sub>) δ 8.14 – 8.08 (m, 1H), 7.67 – 7.61 (m, 1H), 7.46 (d, *J* = 8.6 Hz, 2H), 7.44 – 7.33 (m, 6H), 7.25 – 7.17 (m, 2H), 3.57 (d, *J* = 14.4 Hz, 1H), 3.48 (d, *J* = 16.5 Hz, 1H), 3.21 (d, *J* = 14.3 Hz, 1H), 2.83 (dd, *J* = 11.1, 6.5 Hz, 2H), 2.70 (dd, *J* = 12.4, 5.0 Hz, 2H), 2.48 (d, *J* = 16.5 Hz, 1H), 1.41 (d, *J* = 5.8 Hz, 6H). <sup>13</sup>C {<sup>1</sup>H} NMR (100 MHz, CDCl<sub>3</sub>) δ 196.0, 147.4, 145.0, 139.8, 138.7, 135.5, 134.2, 134.1, 132.5, 130.5, 129.8, 129.4, 128.5, 128.3, 128.1, 127.5, 126.6, 122.8, 121.7, 53.9, 53.5, 48.6, 45.9, 25.5, 23.7. HRMS (ESI) *m/z* calcd for C<sub>29</sub>H<sub>27</sub>ClNO<sub>3</sub>S [M+H]<sup>+</sup> 504.1400, found 504.1405.

6a-((Piperidin-1-ylsulfonyl)methyl)-11-(4-(trifluoromethyl)phenyl)-6,6a-dihydro-5H-benzo[a]fluoren-5-one (**5g**)

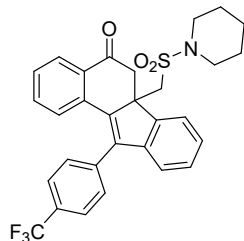

White solid. 72.0 mg. Yield: 67%. Purification by column chromatography (EtOAc/Pe, 1:8 v/v). mp 166-168°C. <sup>1</sup>H NMR (400 MHz, CDCl<sub>3</sub>) δ 8.15 – 8.09 (m, 1H), 7.75 (d, *J* = 8.1 Hz, 2H), 7.68 – 7.62 (m, 1H), 7.56 (d, *J* = 7.6 Hz, 2H), 7.44 – 7.33 (m, 4H), 7.24 – 7.19 (m, 1H), 7.17 – 7.11 (m, 1H), 3.59 (d, *J* = 14.3 Hz, 1H), 3.49 (d, *J* = 16.6 Hz, 1H), 3.23 (d, *J* = 14.3 Hz, 1H), 2.84 (dd, *J* = 11.0, 6.5 Hz, 2H), 2.71 (dd, *J* = 12.3, 4.9 Hz, 2H), 2.51 (d, *J* = 16.6 Hz, 1H), 1.41 (s, 6H). <sup>13</sup>C {<sup>1</sup>H} NMR (100 MHz, CDCl<sub>3</sub>) δ 195.8, 147.4, 144.8, 140.3, 138.5, 138.1, 135.3, 134.2, 130.4 (q, *J* = 32.5 Hz), 129.8, 129.6, 128.5, 128.5, 128.1, 127.6, 126.7, 126.0 (q, *J* = 3.6 Hz), 124.1 (q, *J* = 272.2 Hz), 122.8, 121.6, 53.8, 53.7, 48.6, 45.9, 25.5, 23.6. <sup>19</sup>F NMR (376 MHz, CDCl<sub>3</sub>) δ -62.49 (s). HRMS (ESI) *m/z* calcd for C<sub>30</sub>H<sub>27</sub>F<sub>3</sub>NO<sub>3</sub>S [M+H]<sup>+</sup> 538.1664, found 538.1667.

6a-((Piperidin-1-ylsulfonyl)methyl)-11-(*m*-tolyl)-6,6a-dihydro-5H-benzo[a]fluoren-5-one (**5h**)

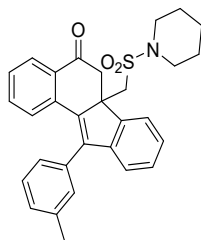

White solid. 73.5 mg. Yield: 76%. Purification by column chromatography (EtOAc/Pe, 1:8 v/v). mp 182-184°C. <sup>1</sup>H NMR (400 MHz, CDCl<sub>3</sub>) δ 8.15 – 8.06 (m, 1H), 7.66 (dd, *J* = 5.9, 2.7 Hz, 1H), 7.41 –

7.32 (m, 5H), 7.30 – 7.17 (m, 5H), 3.58 (d,  $J = 14.4$  Hz, 1H), 3.50 (d,  $J = 16.5$  Hz, 1H), 3.21 (d,  $J = 14.4$  Hz, 1H), 2.85 (dd,  $J = 11.3, 6.3$  Hz, 2H), 2.71 (dd,  $J = 12.3, 5.1$  Hz, 2H), 2.48 (d,  $J = 16.5$  Hz, 1H), 2.39 (s, 3H), 1.44 – 1.37 (m, 6H).  $^{13}\text{C}$  { $^1\text{H}$ } NMR (100 MHz,  $\text{CDCl}_3$ )  $\delta$  196.3, 147.5, 145.5, 140.3, 139.0, 138.7, 135.9, 133.9, 133.9, 129.8, 129.5, 129.0, 128.9, 128.3, 128.3, 128.0, 127.3, 126.4, 126.1, 122.8, 122.0, 54.0, 53.4, 48.6, 45.9, 25.5, 23.7, 21.5. HRMS (ESI)  $m/z$  calcd for  $\text{C}_{30}\text{H}_{30}\text{NO}_3\text{S}$  [ $\text{M}+\text{H}$ ] $^+$  484.1946, found 484.1948.

9-Methyl-11-phenyl-6a-((piperidin-1-ylsulfonyl)methyl)-6,6a-dihydro-5H-benzo[*a*]fluoren-5-one (**5i**)

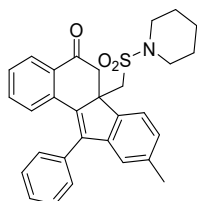

White solid. 64.8 mg. Yield: 67%. Purification by column chromatography (EtOAc/Pe, 1:8 v/v). mp 203-205°C.  $^1\text{H}$  NMR (400 MHz,  $\text{CDCl}_3$ )  $\delta$  8.12 – 8.06 (m, 1H), 7.56 (d,  $J = 7.6$  Hz, 1H), 7.52 – 7.44 (m, 3H), 7.43 – 7.31 (m, 4H), 7.21 – 7.15 (m, 2H), 7.05 (s, 1H), 3.54 (d,  $J = 4.2$  Hz, 1H), 3.51 (d,  $J = 6.4$  Hz, 1H), 3.17 (d,  $J = 14.3$  Hz, 1H), 2.86 (dd,  $J = 11.4, 6.2$  Hz, 2H), 2.74 (dd,  $J = 12.4, 5.2$  Hz, 2H), 2.47 (d,  $J = 16.5$  Hz, 1H), 2.36 (s, 3H), 1.47 – 1.37 (m, 6H).  $^{13}\text{C}$  { $^1\text{H}$ } NMR (100 MHz,  $\text{CDCl}_3$ )  $\delta$  196.3, 145.5, 144.8, 140.1, 139.4, 138.3, 135.9, 134.2, 133.8, 129.8, 129.0, 129.0, 128.2, 128.0, 127.4, 127.2, 122.7, 122.5, 53.9, 53.1, 48.6, 46.0, 25.5, 23.7, 21.6. HRMS (ESI)  $m/z$  calcd for  $\text{C}_{30}\text{H}_{30}\text{NO}_3\text{S}$  [ $\text{M}+\text{H}$ ] $^+$  484.1946, found 484.1949.

9-Fluoro-11-phenyl-6a-((piperidin-1-ylsulfonyl)methyl)-6,6a-dihydro-5H-benzo[*a*]fluoren-5-one (**5j**)

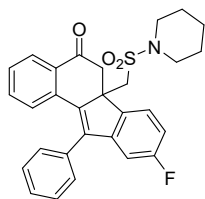

White solid. 65.3 mg. Yield: 67%. Purification by column chromatography (EtOAc/Pe, 1:8 v/v). mp 179-180°C.  $^1\text{H}$  NMR (400 MHz,  $\text{CDCl}_3$ )  $\delta$  8.11 (dd,  $J = 6.0, 3.2$  Hz, 1H), 7.63 (dd,  $J = 8.3, 4.9$  Hz, 1H), 7.53 – 7.44 (m, 3H), 7.38 (dt,  $J = 7.3, 4.0$  Hz, 4H), 7.23 – 7.16 (m, 1H), 7.04 (td,  $J = 8.8, 2.4$  Hz, 1H), 6.94 (dd,  $J = 8.9, 2.4$  Hz, 1H), 3.52 (t,  $J = 15.5$  Hz, 2H), 3.14 (d,  $J = 14.3$  Hz, 1H), 2.88 (dd,  $J = 11.4, 6.4$  Hz, 2H), 2.78 (dd,  $J = 12.3, 5.0$  Hz, 2H), 2.48 (d,  $J = 16.5$  Hz, 1H), 1.45 (dd,  $J = 9.0, 4.7$  Hz, 6H).  $^{13}\text{C}$  { $^1\text{H}$ } NMR (100 MHz,  $\text{CDCl}_3$ )  $\delta$  195.8, 163.4 (d,  $J = 245.4$  Hz), 147.4 (d,  $J = 8.8$  Hz), 142.9, 142.9, 141.1, 139.3 (d,  $J = 3.0$  Hz), 135.3, 134.0, 133.4, 129.8, 129.2, 128.9, 128.5, 128.4, 128.2, 127.5, 124.1 (d,  $J = 9.0$  Hz), 113.1 (d,  $J = 23.3$  Hz), 109.1 (d,  $J = 23.9$  Hz), 53.7, 53.0, 48.3, 46.1, 25.5, 23.7.  $^{19}\text{F}$  NMR (376 MHz,  $\text{CDCl}_3$ )  $\delta$  -113.41 (s). HRMS (ESI)  $m/z$  calcd for  $\text{C}_{29}\text{H}_{27}\text{FNO}_3\text{S}$  [ $\text{M}+\text{H}$ ] $^+$  488.1696, found 488.1700.

3-Fluoro-11-phenyl-6a-((piperidin-1-ylsulfonyl)methyl)-6,6a-dihydro-5H-benzo[*a*]fluoren-5-one (**5k**)

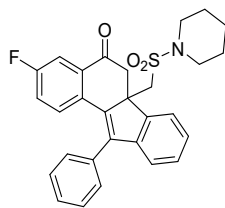

White solid. 76.1 mg. Yield: 78%. Purification by column chromatography (EtOAc/Pe, 1:8 v/v). mp 168-170°C. <sup>1</sup>H NMR (400 MHz, CDCl<sub>3</sub>) δ 7.75 (dd, *J* = 8.9, 2.8 Hz, 1H), 7.65 (dd, *J* = 5.6, 2.8 Hz, 1H), 7.52 – 7.43 (m, 3H), 7.42 – 7.33 (m, 4H), 7.29 – 7.25 (m, 1H), 7.21 (dd, *J* = 8.7, 5.2 Hz, 1H), 7.08 (td, *J* = 8.4, 2.8 Hz, 1H), 3.54 (dd, *J* = 20.5, 15.5 Hz, 2H), 3.18 (d, *J* = 14.4 Hz, 1H), 2.85 (dd, *J* = 11.4, 6.4 Hz, 2H), 2.72 (dd, *J* = 12.3, 5.0 Hz, 2H), 2.48 (d, *J* = 16.6 Hz, 1H), 1.49 – 1.37 (m, 6H). <sup>13</sup>C {<sup>1</sup>H} NMR (100 MHz, CDCl<sub>3</sub>) δ 195.3, 162.2 (d, *J* = 250.4 Hz), 147.3, 145.3, 139.9, 138.3, 133.8, 132.2 (d, *J* = 3.3 Hz), 131.7, 131.7, 130.5 (d, *J* = 7.3 Hz), 129.1, 129.0, 128.4 (d, *J* = 8.2 Hz), 126.5, 122.7, 122.0, 121.6 (d, *J* = 22.5 Hz), 113.4 (d, *J* = 22.5 Hz), 53.9, 53.4, 48.4, 46.0, 25.5, 23.7. <sup>19</sup>F NMR (376 MHz, CDCl<sub>3</sub>) δ -111.11 (s). HRMS (ESI) *m/z* calcd for C<sub>29</sub>H<sub>27</sub>FNO<sub>3</sub>S [M+H]<sup>+</sup> 488.1696, found 488.1697.

### 3-Chloro-11-phenyl-6a-((piperidin-1-ylsulfonyl)methyl)-6,6a-dihydro-5H-benzo[a]fluoren-5-one (**5l**)

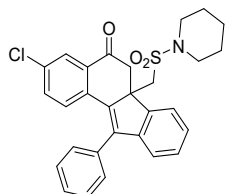

White solid. 75.6 mg. Yield: 75%. Purification by column chromatography (EtOAc/Pe, 1:8 v/v). mp 192-193°C. <sup>1</sup>H NMR (400 MHz, CDCl<sub>3</sub>) δ 8.05 (d, *J* = 2.3 Hz, 1H), 7.68 – 7.63 (m, 1H), 7.52 – 7.44 (m, 3H), 7.42 – 7.26 (m, 6H), 7.15 (d, *J* = 8.5 Hz, 1H), 3.54 (dd, *J* = 22.2, 15.5 Hz, 2H), 3.17 (d, *J* = 14.3 Hz, 1H), 2.86 (dd, *J* = 11.3, 6.4 Hz, 2H), 2.72 (dd, *J* = 12.2, 5.0 Hz, 2H), 2.47 (d, *J* = 16.6 Hz, 1H), 1.47 – 1.37 (m, 6H). <sup>13</sup>C {<sup>1</sup>H} NMR (100 MHz, CDCl<sub>3</sub>) δ 195.1, 147.4, 145.2, 140.7, 138.2, 134.3, 134.2, 134.0, 133.7, 130.9, 129.7, 129.1, 128.9, 128.5, 128.5, 127.2, 126.7, 122.7, 122.1, 53.9, 53.3, 48.4, 46.0, 25.5, 23.7. HRMS (ESI) *m/z* calcd for C<sub>29</sub>H<sub>27</sub>ClNO<sub>3</sub>S [M+H]<sup>+</sup> 504.1400, found 504.1397.

### 3-Methoxy-11-phenyl-6a-((piperidin-1-ylsulfonyl)methyl)-6,6a-dihydro-5H-benzo[a]fluoren-5-one (**5m**)

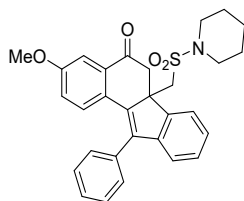

White solid. 63.0 mg. Yield: 63%. Purification by column chromatography (EtOAc/Pe, 1:8 v/v). mp 202-203°C. <sup>1</sup>H NMR (400 MHz, CDCl<sub>3</sub>) δ 7.69 – 7.64 (m, 1H), 7.57 (d, *J* = 2.7 Hz, 1H), 7.49 – 7.40 (m, 5H), 7.36 – 7.30 (m, 2H), 7.28 – 7.22 (m, 1H), 7.14 (d, *J* = 8.7 Hz, 1H), 6.95 (dd, *J* = 8.7, 2.8 Hz, 1H), 3.86 (s, 3H), 3.55 (dd, *J* = 15.4, 10.7 Hz, 2H), 3.17 (d, *J* = 14.4 Hz, 1H), 2.86 (dd, *J* = 11.3, 6.2 Hz, 2H), 2.72 (dd, *J* = 12.1, 5.0 Hz, 2H), 2.47 (d, *J* = 16.5 Hz, 1H), 1.49 – 1.33 (m, 6H). <sup>13</sup>C {<sup>1</sup>H} NMR (100 MHz, CDCl<sub>3</sub>) δ 196.2, 159.4, 147.2, 145.5, 139.3, 138.3, 134.2, 131.1, 129.7, 129.1, 129.0, 129.0,

128.3, 128.2, 126.1, 122.9, 122.3, 121.6, 109.3, 55.6, 54.1, 53.5, 48.3, 46.0, 25.5, 23.7. HRMS (ESI)  $m/z$  calcd for  $C_{30}H_{30}NO_4S$   $[M+H]^+$  500.1869, found 500.1865.

2-Methyl-11-phenyl-6a-((piperidin-1-ylsulfonyl)methyl)-6,6a-dihydro-5H-benzo[a]fluoren-5-one (**5n**)

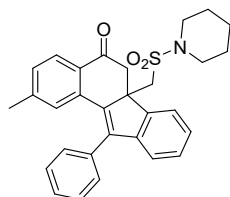

White solid. 69.6 mg. Yield: 72%. Purification by column chromatography (EtOAc/Pe, 1:8 v/v). mp 156-158°C.  $^1H$  NMR (400 MHz,  $CDCl_3$ )  $\delta$  7.99 (d,  $J = 8.0$  Hz, 1H), 7.65 (dd,  $J = 5.9, 2.6$  Hz, 1H), 7.51 – 7.33 (m, 7H), 7.28 (d,  $J = 5.0$  Hz, 1H), 7.16 (d,  $J = 8.0$  Hz, 1H), 6.99 (s, 1H), 3.58 (d,  $J = 14.4$  Hz, 1H), 3.46 (d,  $J = 16.5$  Hz, 1H), 3.23 (d,  $J = 14.4$  Hz, 1H), 2.85 (dd,  $J = 11.2, 6.2$  Hz, 2H), 2.69 (dd,  $J = 12.1, 5.0$  Hz, 2H), 2.46 (d,  $J = 16.5$  Hz, 1H), 2.17 (s, 3H), 1.48 – 1.36 (m, 6H).  $^{13}C$   $\{^1H\}$  NMR (100 MHz,  $CDCl_3$ )  $\delta$  195.9, 147.5, 145.4, 144.8, 139.8, 139.5, 135.8, 134.1, 129.2, 129.0, 128.9, 128.6, 128.3, 128.2, 127.6, 127.4, 126.3, 122.8, 121.9, 54.1, 53.5, 48.6, 45.9, 25.5, 23.7, 21.9. HRMS (ESI)  $m/z$  calcd for  $C_{30}H_{30}NO_3S$   $[M+H]^+$  484.1946, found 484.1950.

2-Fluoro-11-phenyl-6a-((piperidin-1-ylsulfonyl)methyl)-6,6a-dihydro-5H-benzo[a]fluoren-5-one (**5o**)

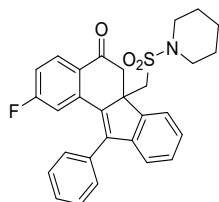

White solid. 48.8 mg. Yield: 50%. Purification by column chromatography (EtOAc/Pe, 1:8 v/v). mp 188-190°C.  $^1H$  NMR (400 MHz,  $CDCl_3$ )  $\delta$  8.13 (dd,  $J = 8.7, 5.9$  Hz, 1H), 7.64 (dd,  $J = 5.6, 2.6$  Hz, 1H), 7.55 – 7.44 (m, 3H), 7.44 – 7.33 (m, 4H), 7.30 – 7.26 (m, 1H), 7.02 (td,  $J = 8.5, 2.5$  Hz, 1H), 6.85 (dd,  $J = 9.8, 2.5$  Hz, 1H), 3.58 (d,  $J = 14.4$  Hz, 1H), 3.47 (d,  $J = 16.5$  Hz, 1H), 3.22 (d,  $J = 14.4$  Hz, 1H), 2.85 (dd,  $J = 11.2, 6.4$  Hz, 2H), 2.71 (dd,  $J = 12.2, 5.0$  Hz, 2H), 2.47 (d,  $J = 16.5$  Hz, 1H), 1.48 – 1.37 (m, 6H).  $^{13}C$   $\{^1H\}$  NMR (100 MHz,  $CDCl_3$ )  $\delta$  194.8, 165.9 (d,  $J = 255.9$  Hz), 147.5, 145.1, 141.4, 138.7, 138.5, 138.2, 138.1, 130.5 (d,  $J = 10.2$  Hz), 129.2, 128.8, 128.5 (d,  $J = 11.8$  Hz), 126.8, 126.5 (d,  $J = 2.5$  Hz), 122.7, 122.3, 115.9 (d,  $J = 22.6$  Hz), 114.4 (d,  $J = 23.3$  Hz), 54.0, 53.5, 48.4, 45.9, 25.5, 23.7.  $^{19}F$  NMR (376 MHz,  $CDCl_3$ )  $\delta$  -102.20 (s). HRMS (ESI)  $m/z$  calcd for  $C_{29}H_{27}FNO_3S$   $[M+H]^+$  488.1696, found 488.1700.

6a-((Morpholinosulfonyl)methyl)-11-phenyl-6,6a-dihydro-5H-benzo[a]fluoren-5-one (**5p**)

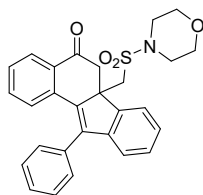

White solid. 61.3 mg. Yield: 65%. Purification by column chromatography (EtOAc/Pe, 1:8 v/v). mp 194-196°C.  $^1H$  NMR (400 MHz,  $CDCl_3$ )  $\delta$  8.16 – 8.07 (m, 1H), 7.66 (dd,  $J = 5.7, 2.7$  Hz, 1H), 7.53 – 7.43 (m, 3H), 7.44 – 7.34 (m, 6H), 7.31 – 7.27 (m, 1H), 7.23 – 7.17 (m, 1H), 3.61 (d,  $J = 14.4$  Hz, 1H),

3.55 – 3.47 (m, 5H), 3.25 (d,  $J = 14.4$  Hz, 1H), 2.90 (dt,  $J = 12.2, 4.7$  Hz, 2H), 2.78 (dt,  $J = 12.4, 4.7$  Hz, 2H), 2.51 (d,  $J = 16.5$  Hz, 1H).  $^{13}\text{C}$   $\{^1\text{H}\}$  NMR (100 MHz,  $\text{CDCl}_3$ )  $\delta$  196.0, 147.3, 145.3, 140.2, 139.0, 135.7, 134.0, 133.9, 129.8, 129.1, 129.0, 128.6, 128.3, 128.2, 127.5, 126.6, 122.7, 122.1, 66.4, 54.0, 53.4, 48.5, 45.1. HRMS (ESI)  $m/z$  calcd for  $\text{C}_{28}\text{H}_{26}\text{NO}_4\text{S}$   $[\text{M}+\text{H}]^+$  472.1583, found 472.1890.

6a-(((4-Methylpiperidin-1-yl)sulfonyl)methyl)-11-phenyl-6,6a-dihydro-5H-benzo[a]fluoren-5-one (**5q**)

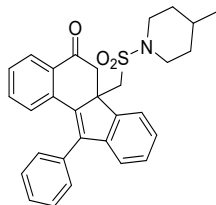

White solid. 82.2 mg. Yield: 85%. Purification by column chromatography (EtOAc/Pe, 1:8 v/v). mp 197-198°C.  $^1\text{H}$  NMR (400 MHz,  $\text{CDCl}_3$ )  $\delta$  8.13 – 8.07 (m, 1H), 7.68 – 7.63 (m, 1H), 7.51 – 7.39 (m, 5H), 7.38 – 7.32 (m, 4H), 7.29 – 7.25 (m, 1H), 7.23 – 7.19 (m, 1H), 3.61 (d,  $J = 14.5$  Hz, 1H), 3.49 (d,  $J = 16.5$  Hz, 1H), 3.43 – 3.33 (m, 2H), 3.24 (d,  $J = 14.4$  Hz, 1H), 2.48 (d,  $J = 16.5$  Hz, 1H), 2.32 (td,  $J = 12.2, 2.5$  Hz, 1H), 2.06 (td,  $J = 12.3, 2.5$  Hz, 1H), 1.53 – 1.42 (m, 2H), 1.34 – 1.19 (m, 1H), 1.09 – 0.94 (m, 2H), 0.84 (d,  $J = 6.5$  Hz, 3H).  $^{13}\text{C}$   $\{^1\text{H}\}$  NMR (100 MHz,  $\text{CDCl}_3$ )  $\delta$  196.2, 147.5, 145.4, 140.0, 139.2, 135.8, 134.0, 133.9, 129.8, 129.0, 128.4, 128.3, 128.1, 127.4, 126.4, 122.7, 122.0, 54.2, 53.5, 48.7, 45.4, 45.3, 33.7, 33.6, 30.3, 21.6. HRMS (ESI)  $m/z$  calcd for  $\text{C}_{30}\text{H}_{30}\text{NO}_3\text{S}$   $[\text{M}+\text{H}]^+$  484.1946, found 484.1949.

11-Phenyl-6a-((pyrrolidin-1-ylsulfonyl)methyl)-6,6a-dihydro-5H-benzo[a]fluoren-5-one (**5r**)

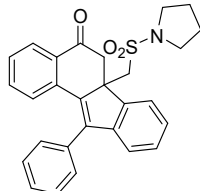

White solid. 47.4 mg. Yield: 52%. Purification by column chromatography (EtOAc/Pe, 1:8 v/v). mp 158-160°C.  $^1\text{H}$  NMR (400 MHz,  $\text{CDCl}_3$ )  $\delta$  8.12 – 8.07 (m, 1H), 7.67 – 7.63 (m, 1H), 7.51 – 7.39 (m, 5H), 7.38 – 7.32 (m, 4H), 7.29 – 7.25 (m, 1H), 7.23 – 7.19 (m, 1H), 3.72 (d,  $J = 14.7$  Hz, 1H), 3.46 (d,  $J = 16.5$  Hz, 1H), 3.35 (d,  $J = 14.7$  Hz, 1H), 3.04 – 2.95 (m, 2H), 2.88 – 2.78 (m, 2H), 2.49 (d,  $J = 16.5$  Hz, 1H), 1.67 – 1.59 (m, 4H).  $^{13}\text{C}$   $\{^1\text{H}\}$  NMR (100 MHz,  $\text{CDCl}_3$ )  $\delta$  196.1, 147.6, 145.3, 140.0, 139.2, 135.9, 134.0, 133.9, 129.8, 129.0, 129.0, 128.3, 128.3, 128.2, 128.1, 127.4, 126.4, 122.4, 121.9, 54.9, 53.6, 48.7, 46.9, 25.6. HRMS (ESI)  $m/z$  calcd for  $\text{C}_{28}\text{H}_{26}\text{NO}_3\text{S}$   $[\text{M}+\text{H}]^+$  456.1633, found 456.1643.

*N,N*-dimethyl-1-(5-oxo-11-phenyl-5,6-dihydro-6aH-benzo[a]fluoren-6a-yl)methanesulfonamide (**5s**)

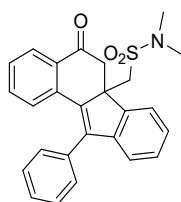

White solid. 54.1 mg. Yield: 63%. Purification by column chromatography (EtOAc/Pe, 1:8 v/v). mp 158-159°C.  $^1\text{H}$  NMR (400 MHz,  $\text{CDCl}_3$ )  $\delta$  8.11 (dd,  $J = 7.1, 2.1$  Hz, 1H), 7.67 – 7.62 (m, 1H), 7.51 –

7.40 (m, 5H), 7.39 – 7.34 (m, 4H), 7.31 – 7.27 (m, 1H), 7.24 – 7.19 (m, 1H), 3.66 (d,  $J = 14.6$  Hz, 1H), 3.47 (d,  $J = 16.5$  Hz, 1H), 3.31 (d,  $J = 14.6$  Hz, 1H), 2.50 (d,  $J = 16.5$  Hz, 1H), 2.42 (s, 6H).  $^{13}\text{C}$   $\{^1\text{H}\}$  NMR (100 MHz,  $\text{CDCl}_3$ )  $\delta$  196.1, 147.4, 145.4, 140.0, 139.2, 135.8, 134.0, 133.9, 129.8, 129.0, 128.5, 128.3, 128.2, 128.1, 127.4, 126.4, 122.5, 122.1, 53.5, 53.5, 48.8, 36.5. HRMS (ESI)  $m/z$  calcd for  $\text{C}_{26}\text{H}_{24}\text{NO}_3\text{S}$   $[\text{M}+\text{H}]^+$  430.1477, found 430.1474.

N-ethyl-N-methyl-1-(5-oxo-11-phenyl-5,6-dihydro-6aH-benzo[a]fluoren-6a-yl)methanesulfonamide (**5t**)

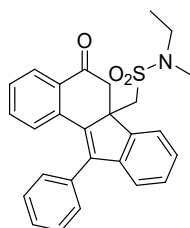

White solid. 60.3 mg. Yield: 68%. Purification by column chromatography (EtOAc/Pe, 1:8 v/v). mp 160-162°C.  $^1\text{H}$  NMR (400 MHz,  $\text{CDCl}_3$ )  $\delta$  8.15 – 8.06 (m, 1H), 7.64 (dd,  $J = 5.8, 2.7$  Hz, 1H), 7.51 – 7.39 (m, 5H), 7.39 – 7.32 (m, 4H), 7.31 – 7.26 (m, 1H), 7.24 – 7.19 (m, 1H), 3.66 (d,  $J = 14.6$  Hz, 1H), 3.47 (d,  $J = 16.5$  Hz, 1H), 3.30 (d,  $J = 14.5$  Hz, 1H), 2.84 (dq,  $J = 14.2, 7.1$  Hz, 1H), 2.67 (dq,  $J = 14.1, 7.1$  Hz, 1H), 2.49 (d,  $J = 16.5$  Hz, 1H), 2.40 (s, 3H), 0.97 (t,  $J = 7.1$  Hz, 3H).  $^{13}\text{C}$   $\{^1\text{H}\}$  NMR (100 MHz,  $\text{CDCl}_3$ )  $\delta$  196.2, 147.4, 145.3, 140.0, 139.3, 135.8, 134.0, 129.8, 129.0, 128.4, 128.3, 128.2, 128.1, 127.4, 126.4, 122.7, 122.0, 54.7, 53.6, 48.9, 44.1, 32.9, 13.4. HRMS (ESI)  $m/z$  calcd for  $\text{C}_{27}\text{H}_{26}\text{NO}_3\text{S}$   $[\text{M}+\text{Na}]^+$  466.1453, found 466.1453.

N,N-diethyl-1-(5-oxo-11-phenyl-5,6-dihydro-6aH-benzo[a]fluoren-6a-yl)methanesulfonamide (**5u**)

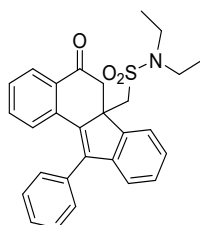

White solid. 60.4 mg. Yield: 66%. Purification by column chromatography (EtOAc/Pe, 1:8 v/v). mp 168-170°C.  $^1\text{H}$  NMR (400 MHz,  $\text{CDCl}_3$ )  $\delta$  8.13 – 8.08 (m, 1H), 7.68 (dd,  $J = 5.6, 2.9$  Hz, 1H), 7.51 – 7.40 (m, 5H), 7.39 – 7.32 (m, 4H), 7.28 – 7.25 (m, 1H), 7.23 – 7.19 (m, 1H), 3.57 (t,  $J = 15.9$  Hz, 2H), 3.22 (d,  $J = 14.3$  Hz, 1H), 2.99 – 2.79 (m, 4H), 2.50 (d,  $J = 16.5$  Hz, 1H), 0.98 (t,  $J = 7.1$  Hz, 6H).  $^{13}\text{C}$   $\{^1\text{H}\}$  NMR (100 MHz,  $\text{CDCl}_3$ )  $\delta$  196.3, 147.4, 145.3, 140.2, 139.2, 135.8, 134.1, 133.9, 129.8, 129.0, 128.4, 128.2, 128.2, 128.0, 127.4, 126.4, 123.0, 121.9, 56.5, 53.7, 48.5, 41.7, 14.6. HRMS (ESI)  $m/z$  calcd for  $\text{C}_{28}\text{H}_{28}\text{NO}_3\text{S}$   $[\text{M}+\text{H}]^+$  458.1790, found 458.1792.

10-Phenyl-5a-((piperidin-1-ylsulfonyl)methyl)-5,5a-dihydro-4H-fluoreno[2,1-b]thiophen-4-one (**5v**)

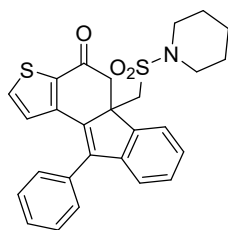

White solid. 65.6 mg. Yield: 69%. Purification by column chromatography (EtOAc/Pe, 1:8 v/v). mp 197-199°C. <sup>1</sup>H NMR (400 MHz, CDCl<sub>3</sub>) δ 7.64 (dd, *J* = 5.6, 2.8 Hz, 1H), 7.57 (d, *J* = 5.1 Hz, 1H), 7.54 – 7.44 (m, 5H), 7.40 – 7.33 (m, 2H), 7.33 – 7.27 (m, 1H), 6.89 (d, *J* = 5.1 Hz, 1H), 3.61 (d, *J* = 14.3 Hz, 1H), 3.43 (d, *J* = 16.2 Hz, 1H), 3.28 (d, *J* = 14.2 Hz, 1H), 2.96 – 2.85 (m, 2H), 2.78 (dd, *J* = 12.5, 5.1 Hz, 2H), 2.53 (d, *J* = 16.2 Hz, 1H), 1.49 – 1.37 (m, 6H). <sup>13</sup>C {<sup>1</sup>H} NMR (100 MHz, CDCl<sub>3</sub>) δ 190.6, 147.5, 145.2, 143.7, 140.1, 137.1, 135.5, 135.0, 133.7, 129.1, 128.8, 128.6, 128.5, 126.7, 126.7, 123.0, 122.2, 55.0, 54.9, 47.8, 46.0, 25.5, 23.7. HRMS (ESI) *m/z* calcd for C<sub>27</sub>H<sub>26</sub>NO<sub>3</sub>S<sub>2</sub> [M+H]<sup>+</sup> 476.1354, found 476.1350.



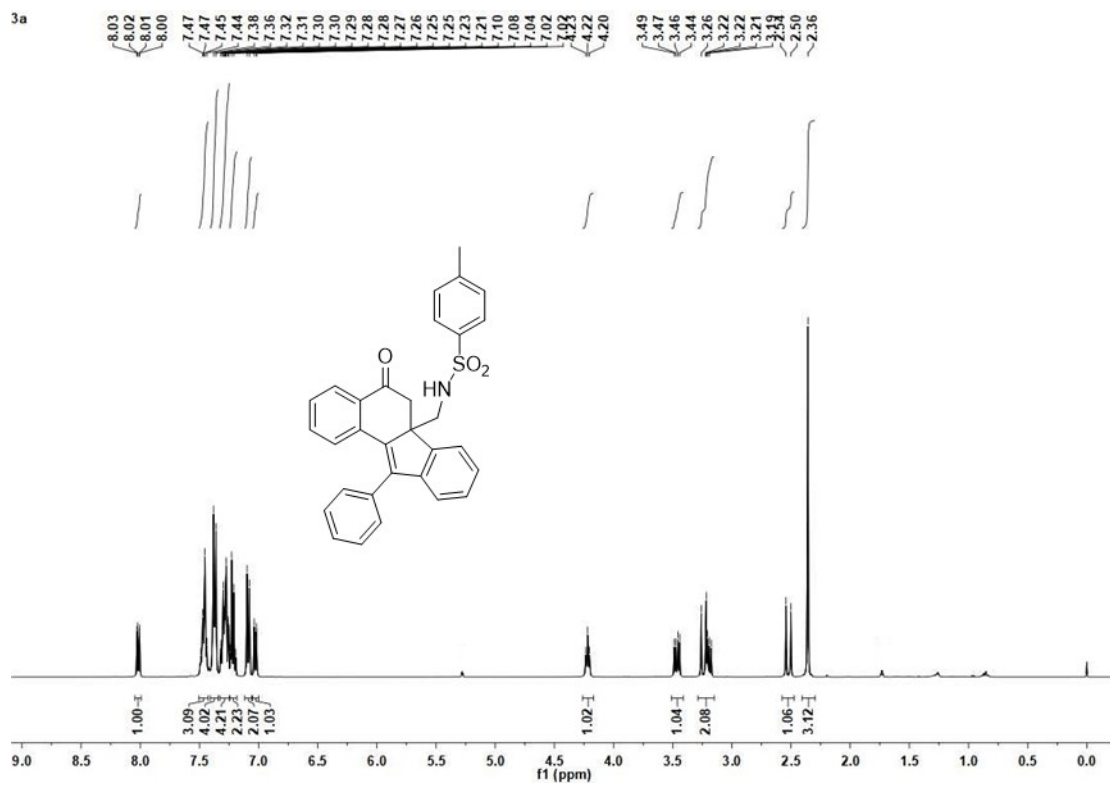

<sup>13</sup>C NMR spectrum of 3ab

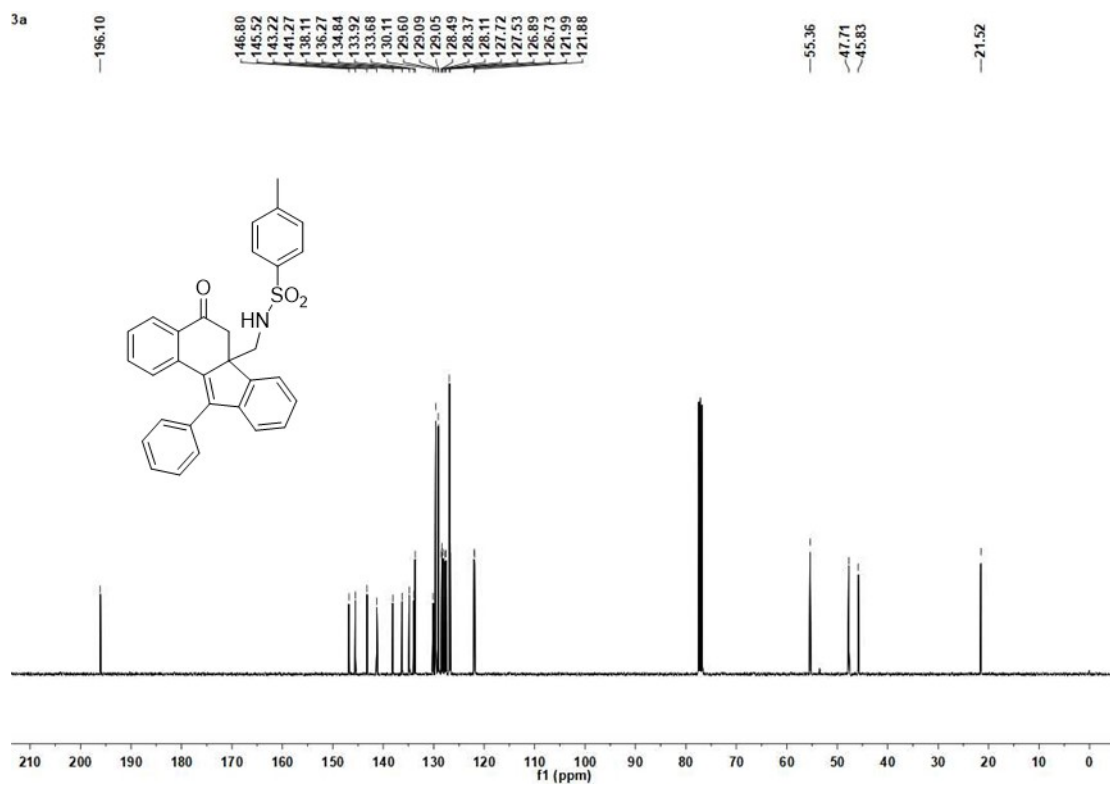

<sup>1</sup>H NMR spectrum of 3ac

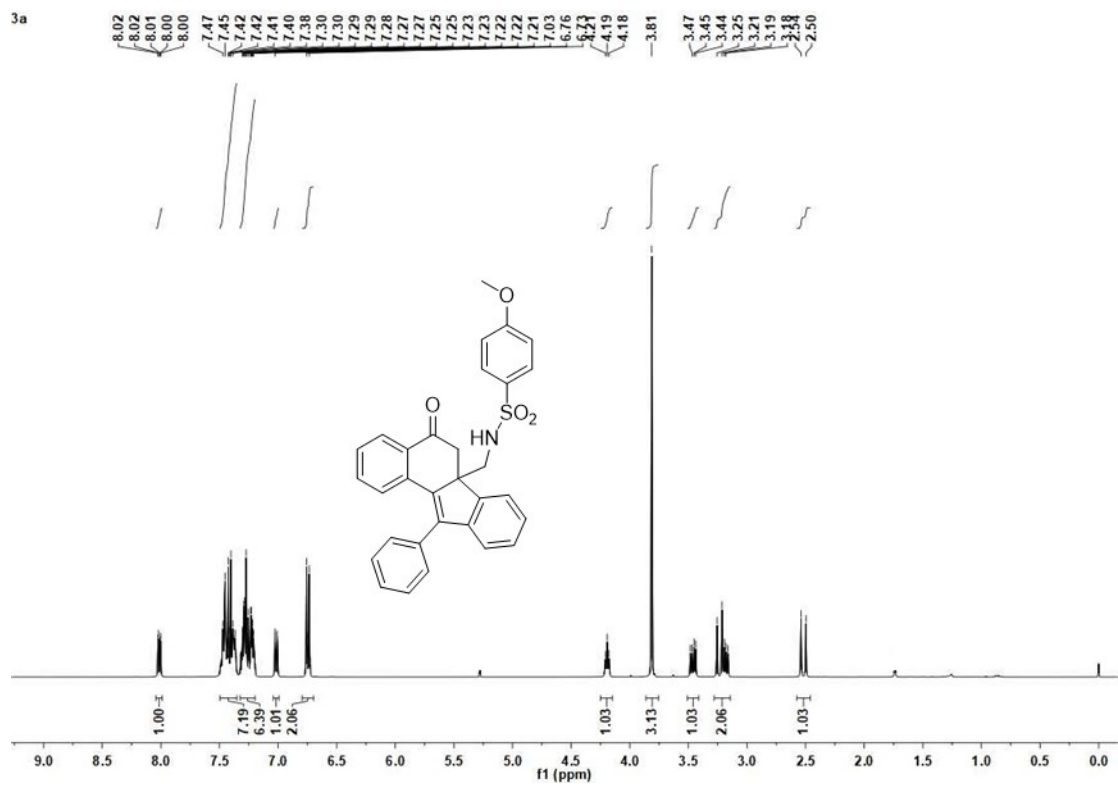

<sup>13</sup>C NMR spectrum of **3ac**

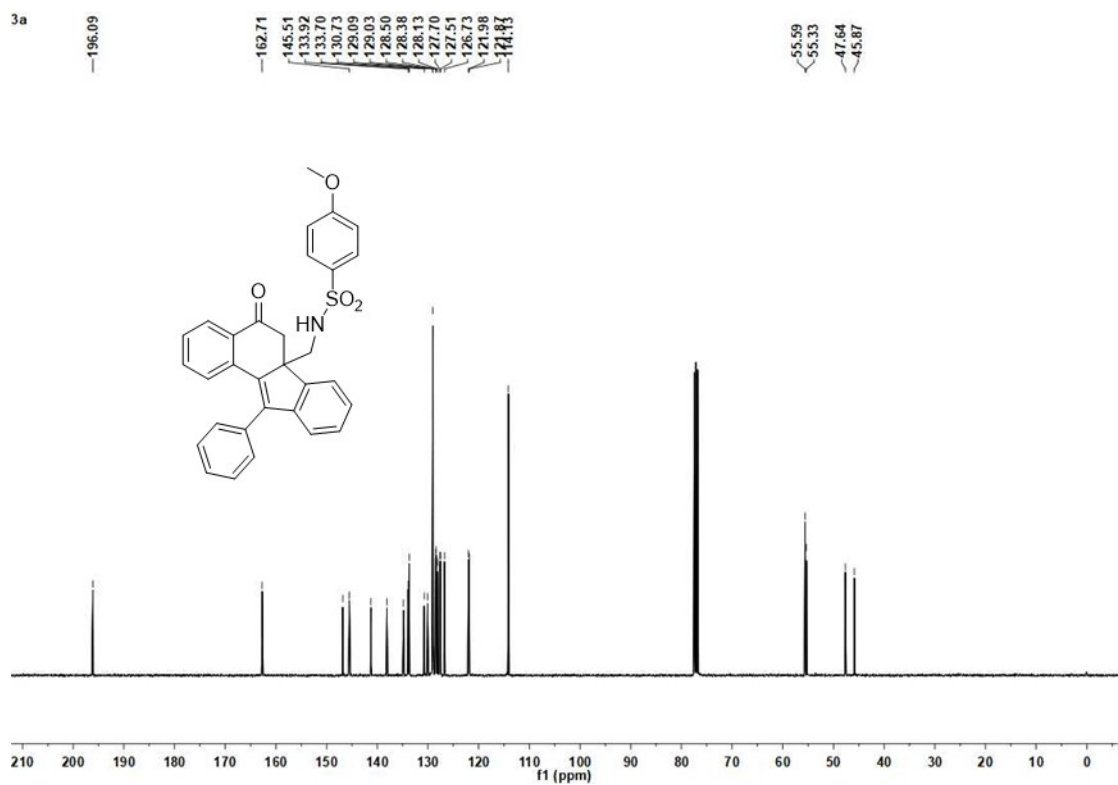

<sup>1</sup>H NMR spectrum of **3ad**

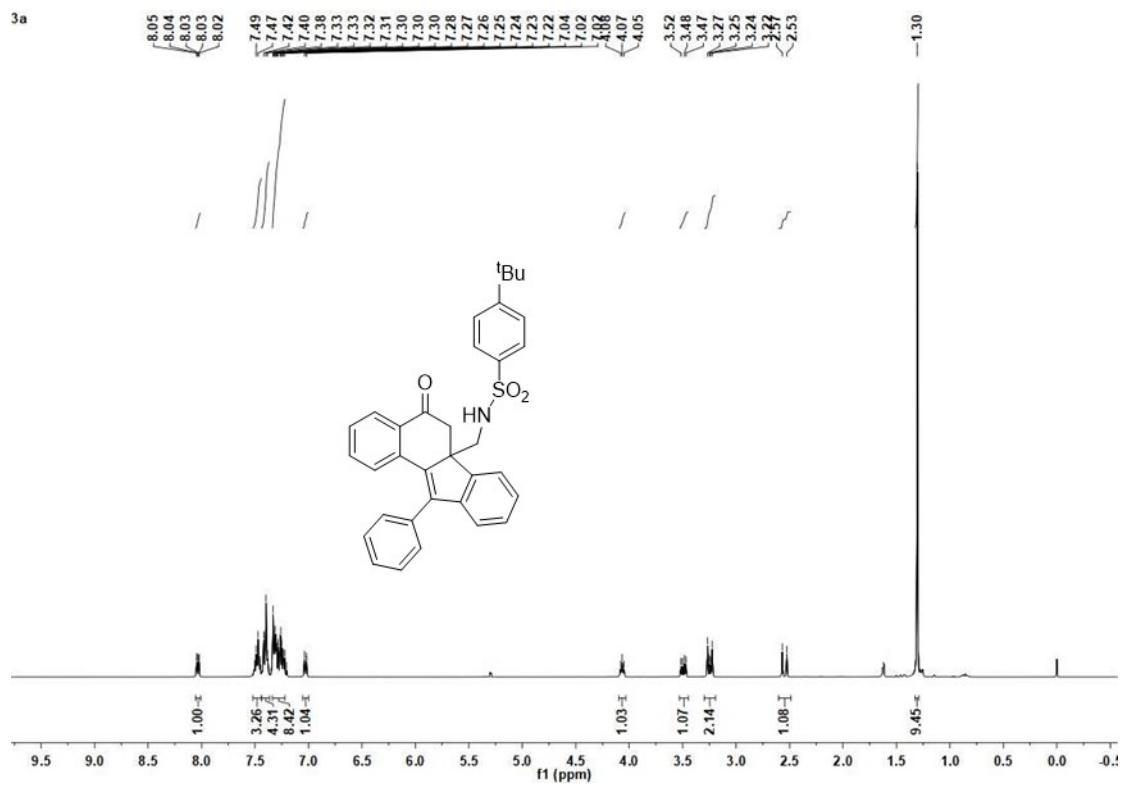

$^{13}\text{C}$  NMR spectrum of 3ad

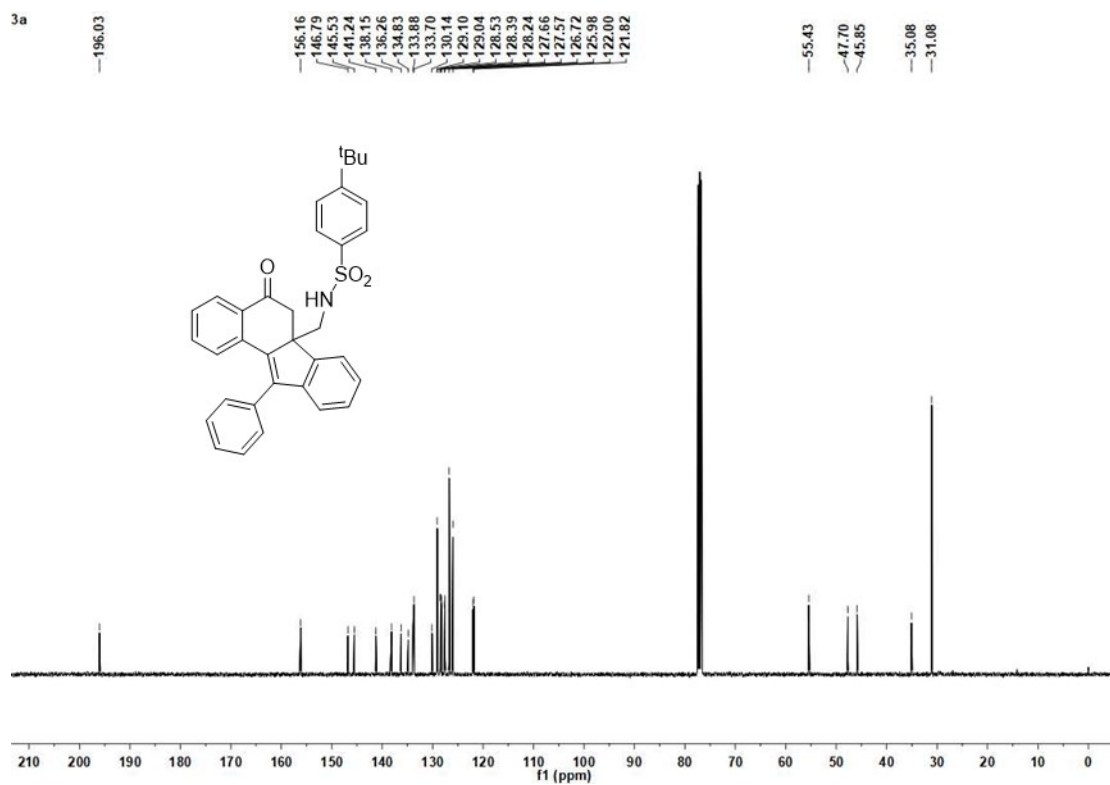

$^1\text{H}$  NMR spectrum of 3ae

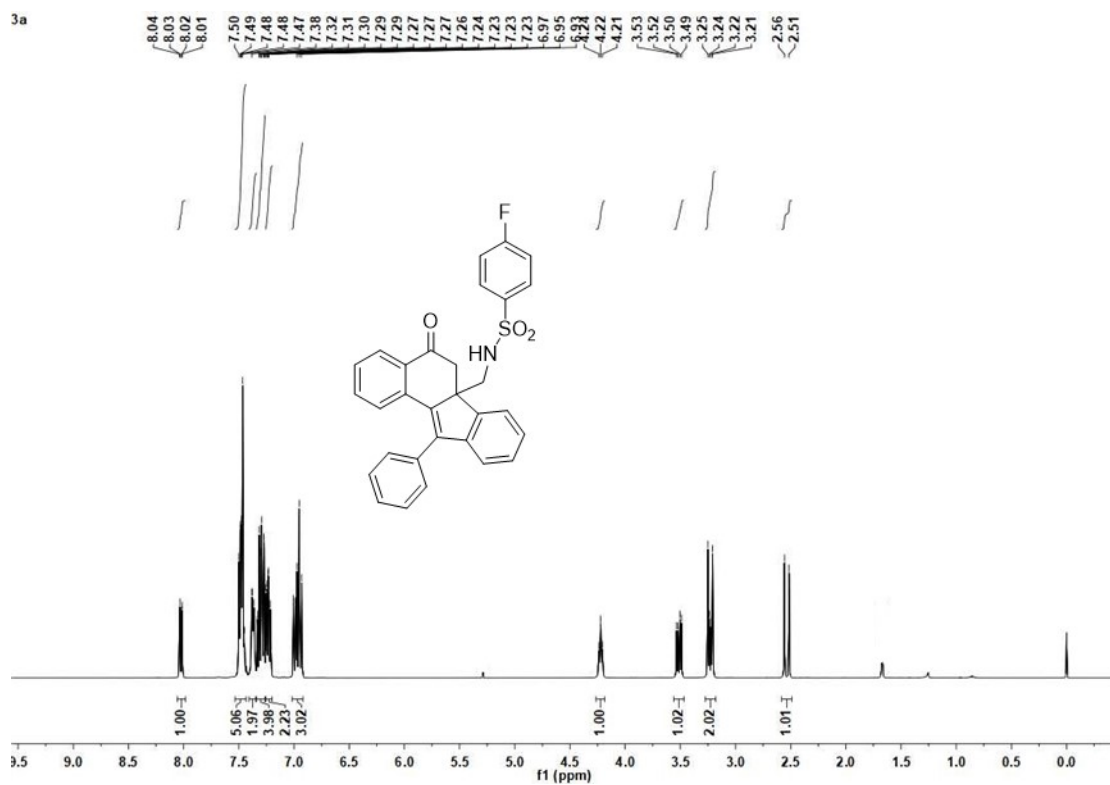

<sup>13</sup>C NMR spectrum of 3a

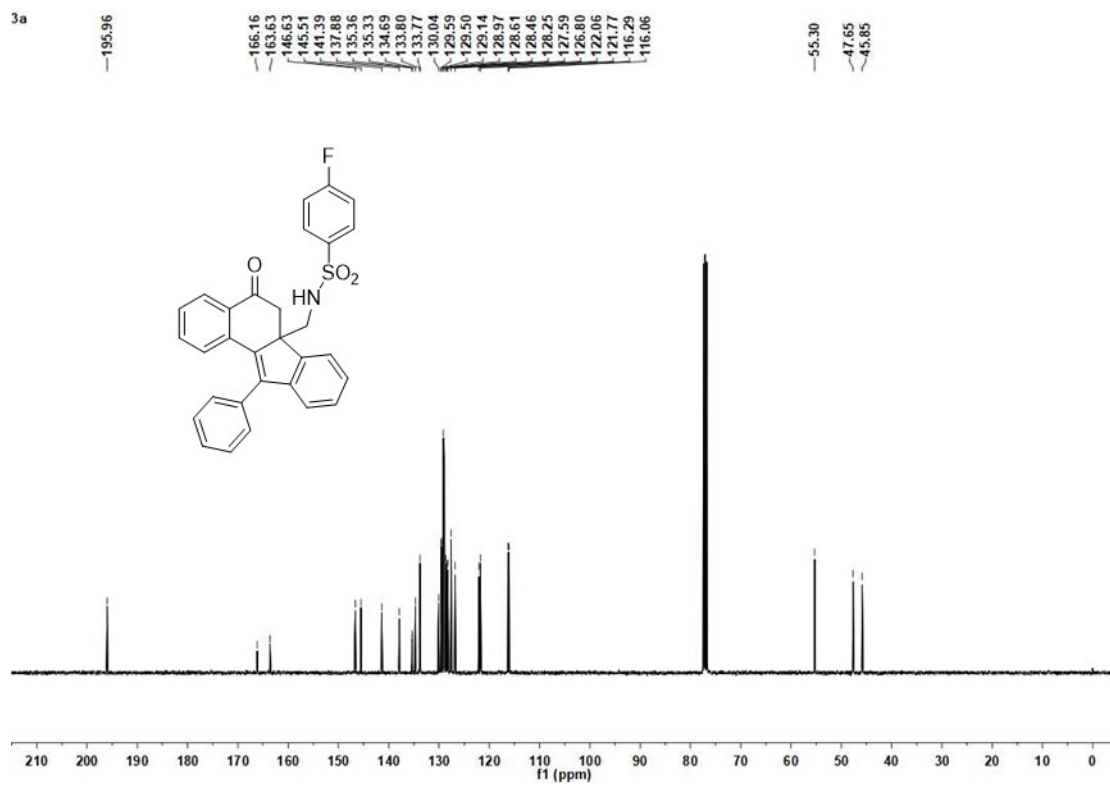

<sup>19</sup>F NMR spectrum of 3a

3a

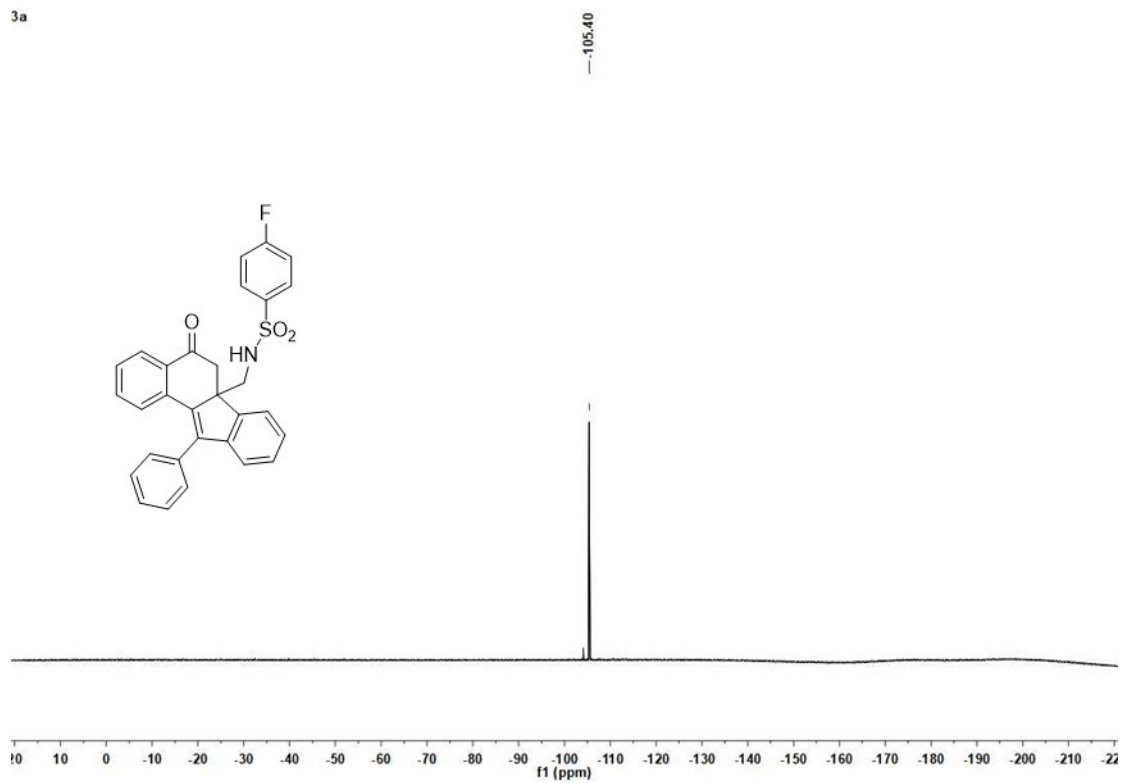

<sup>1</sup>H NMR spectrum of 3af

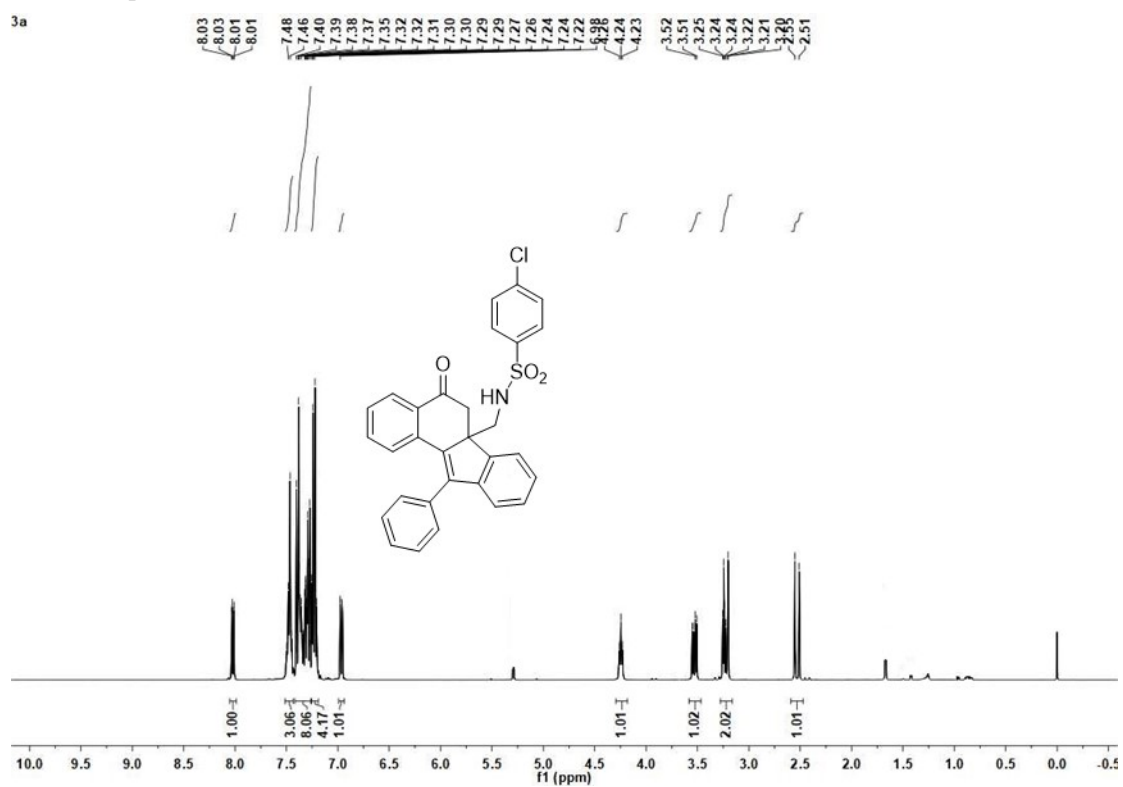

<sup>13</sup>C NMR spectrum of 3af

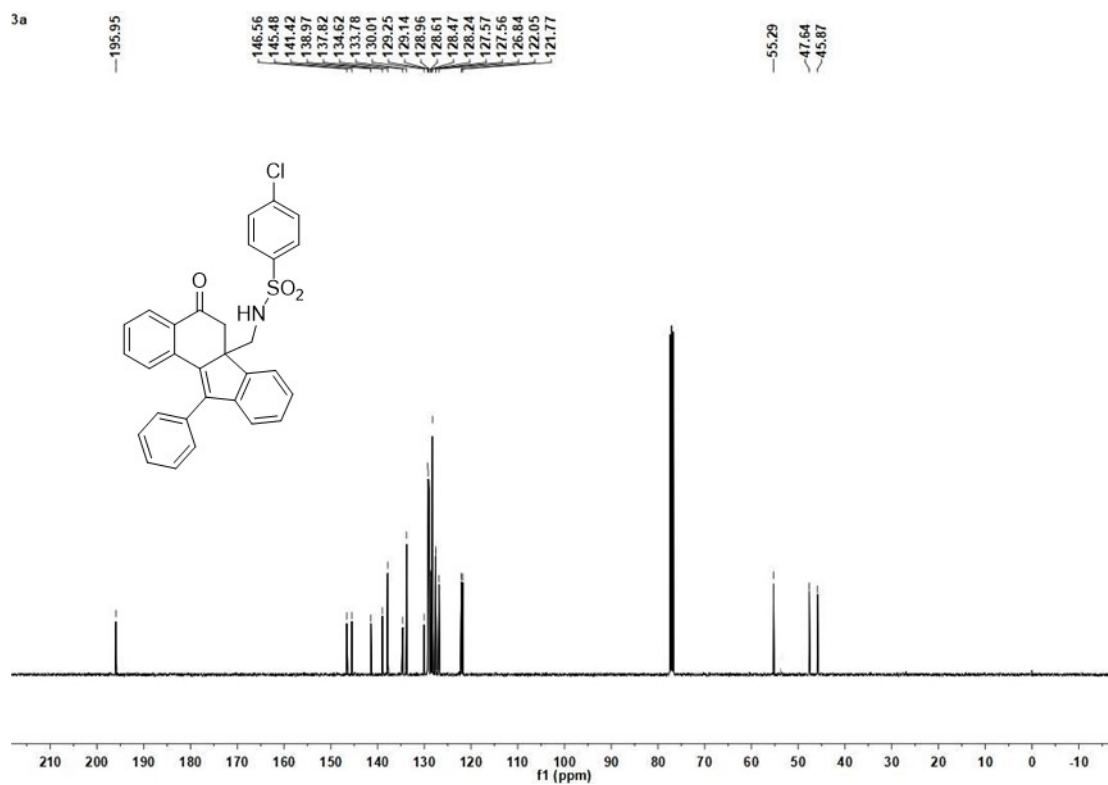

<sup>1</sup>H NMR spectrum of 3ag

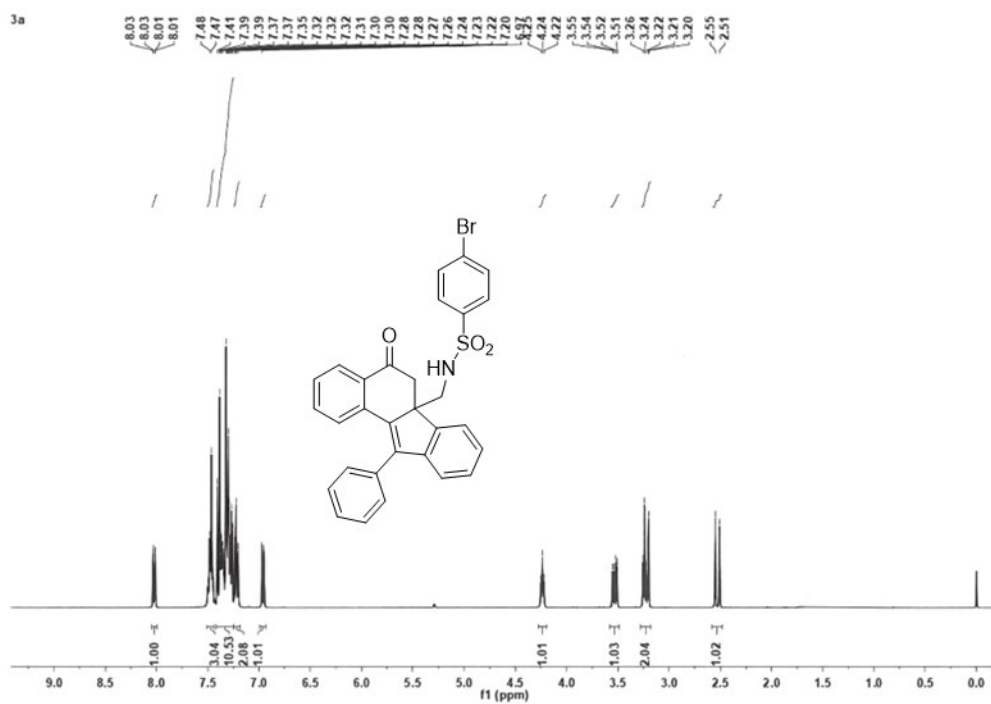

<sup>13</sup>C NMR spectrum of 3ag

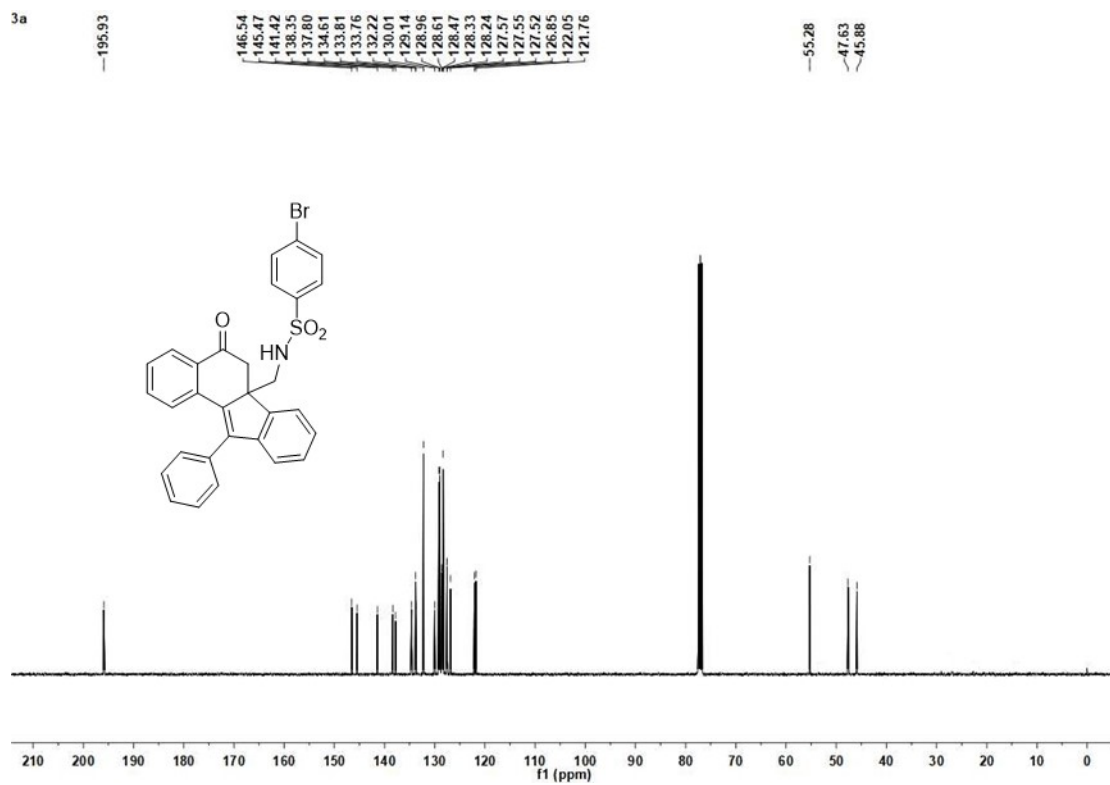

<sup>1</sup>H NMR spectrum of 3ah

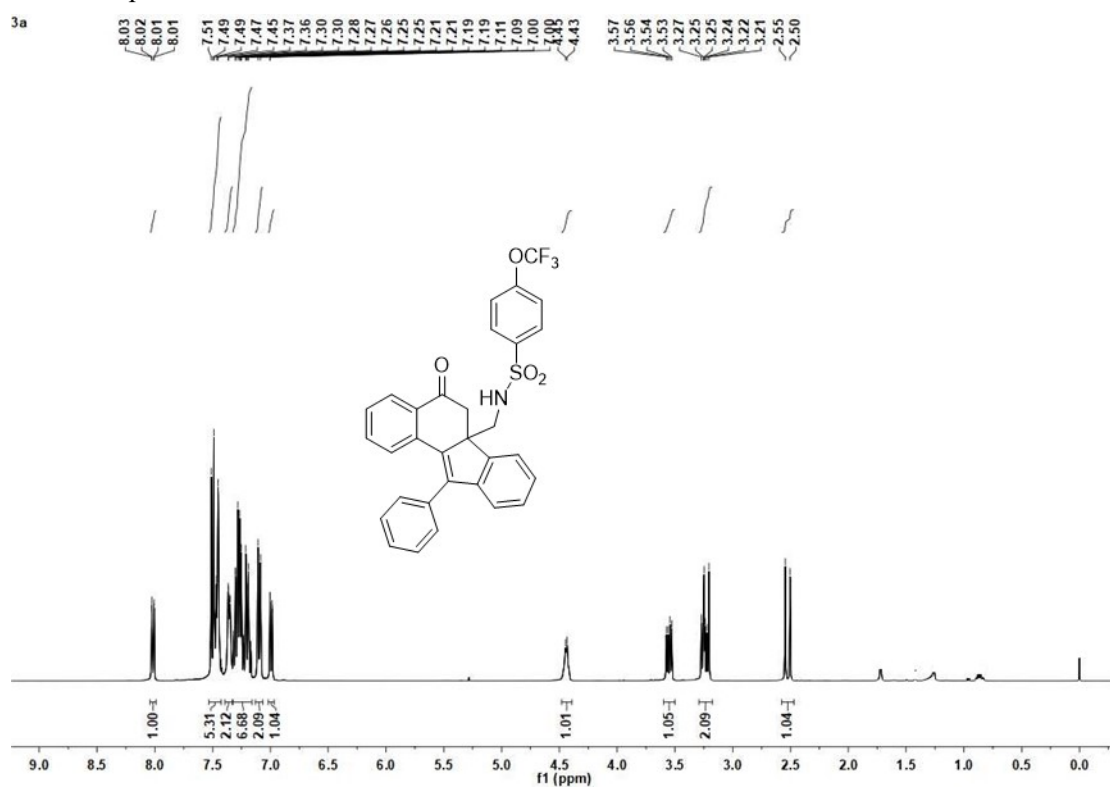

<sup>13</sup>C NMR spectrum of 3ah

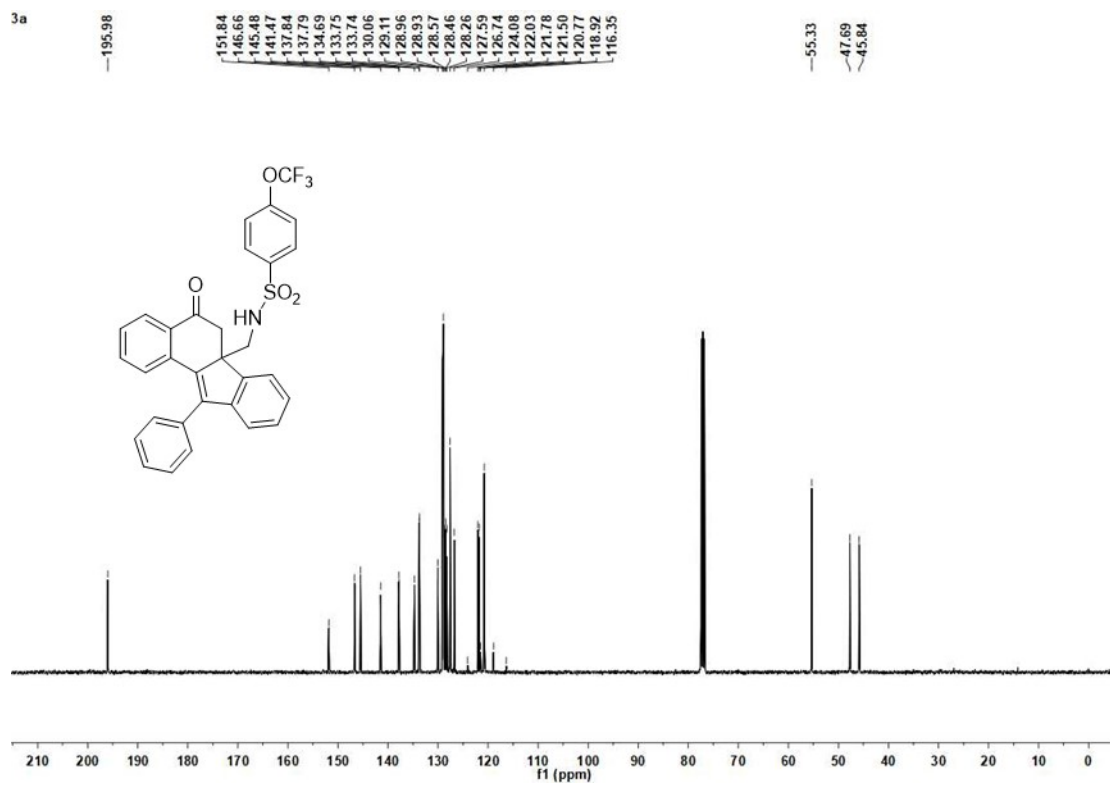

<sup>19</sup>F NMR spectrum of 3ah

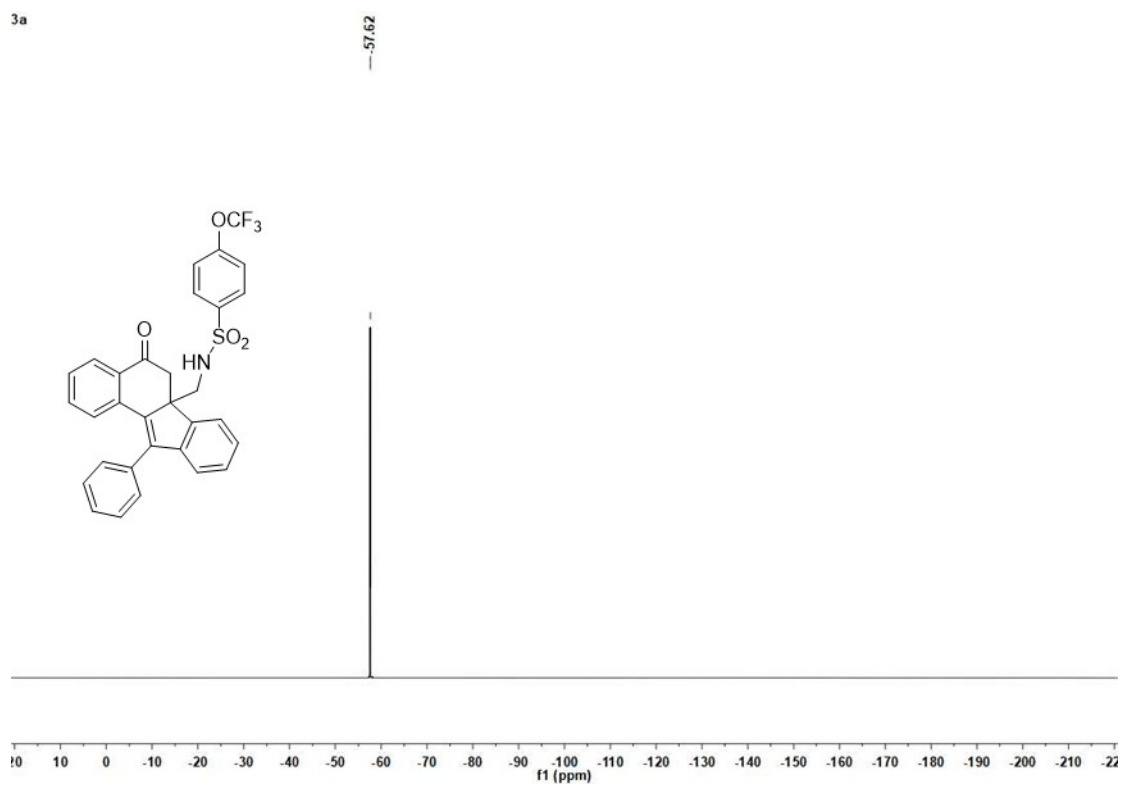

<sup>1</sup>H NMR spectrum of 3ai

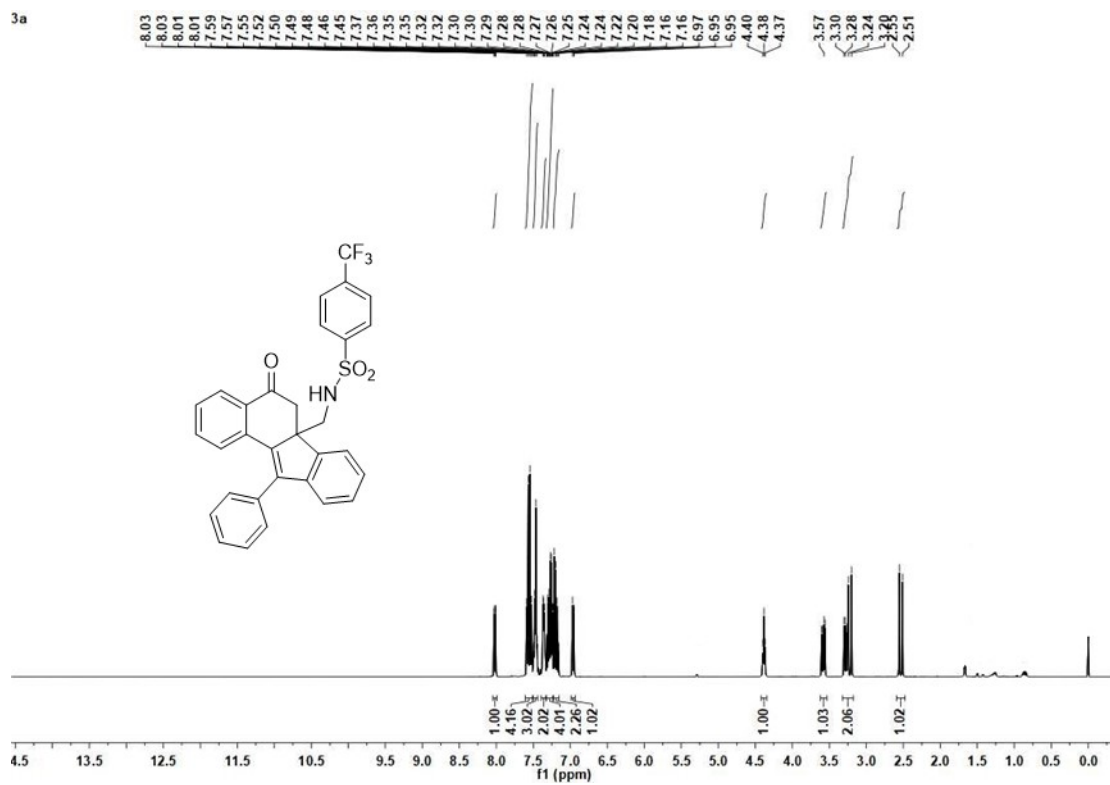

<sup>13</sup>C NMR spectrum of **3ai**

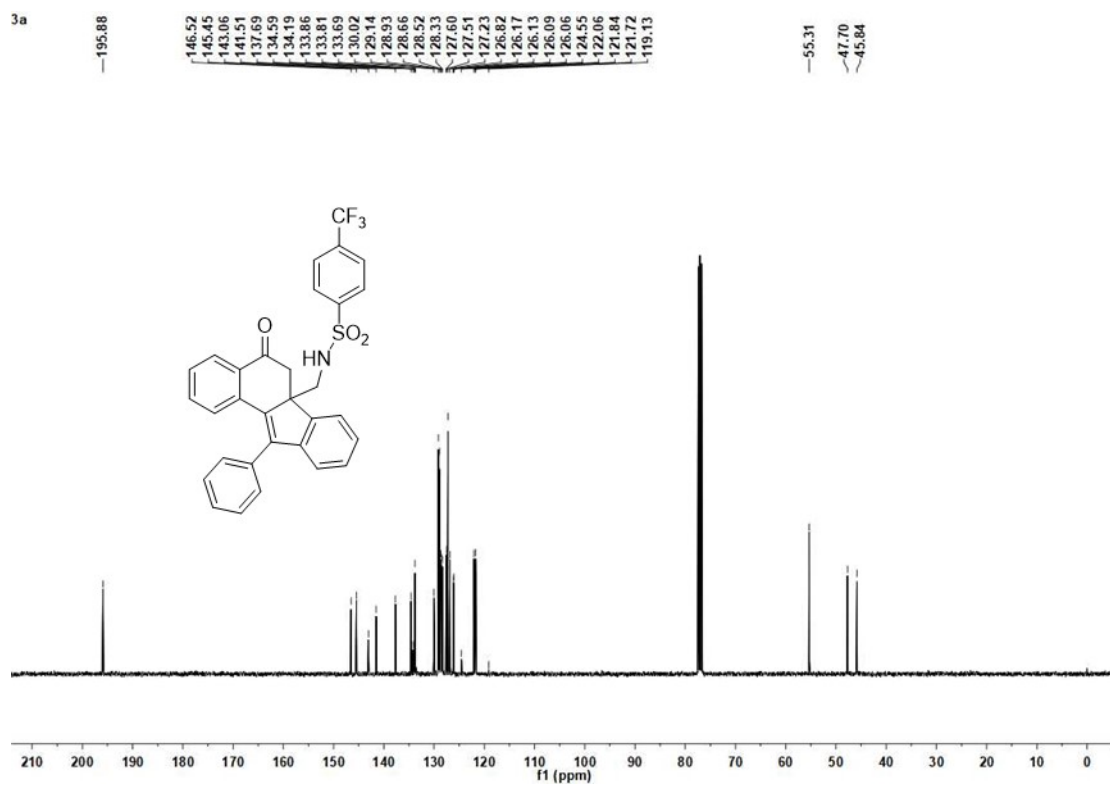

<sup>19</sup>F NMR spectrum of **3ai**

3a

—63.12

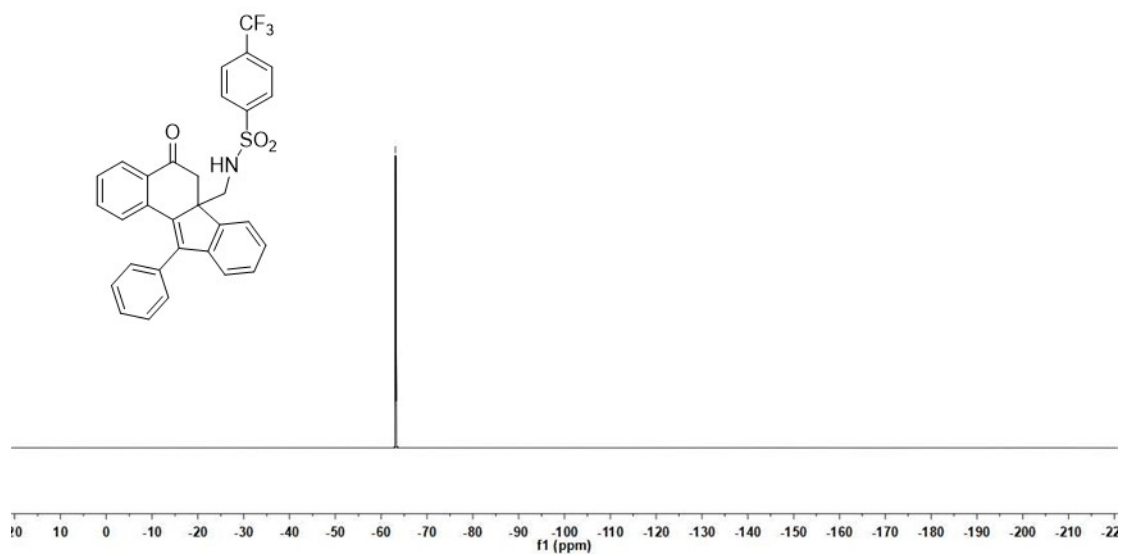

<sup>1</sup>H NMR spectrum of 3aj

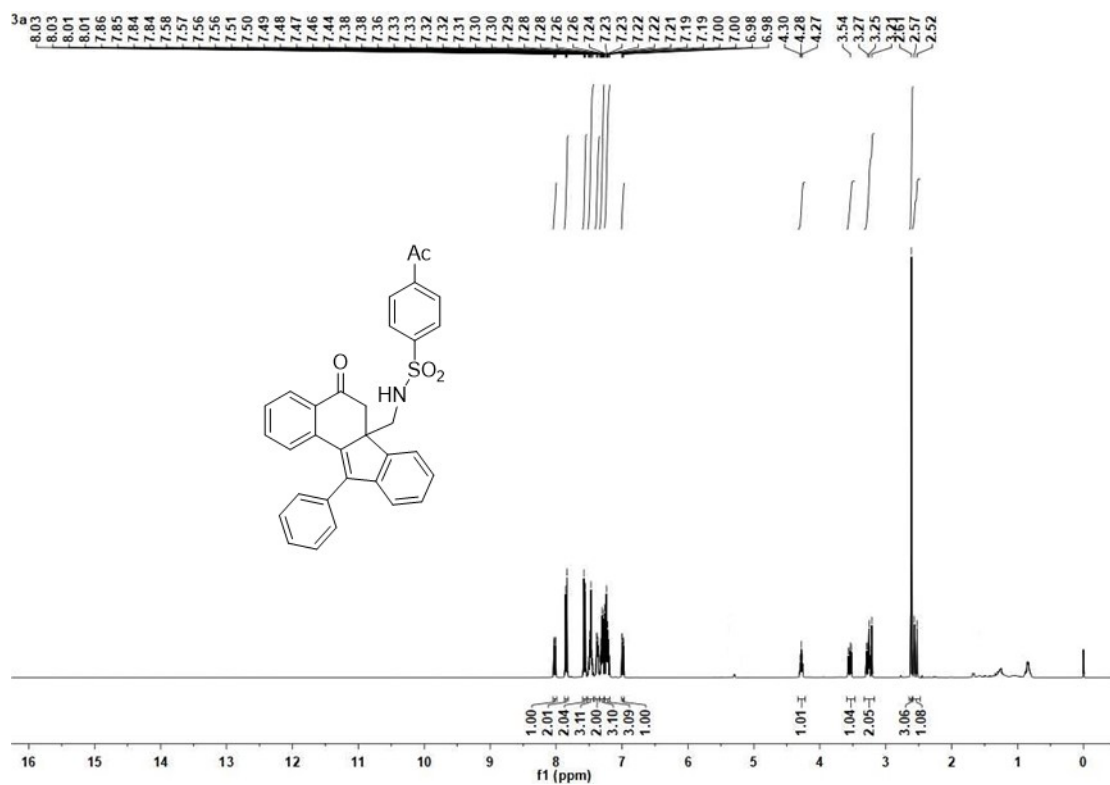

<sup>13</sup>C NMR spectrum of 3aj



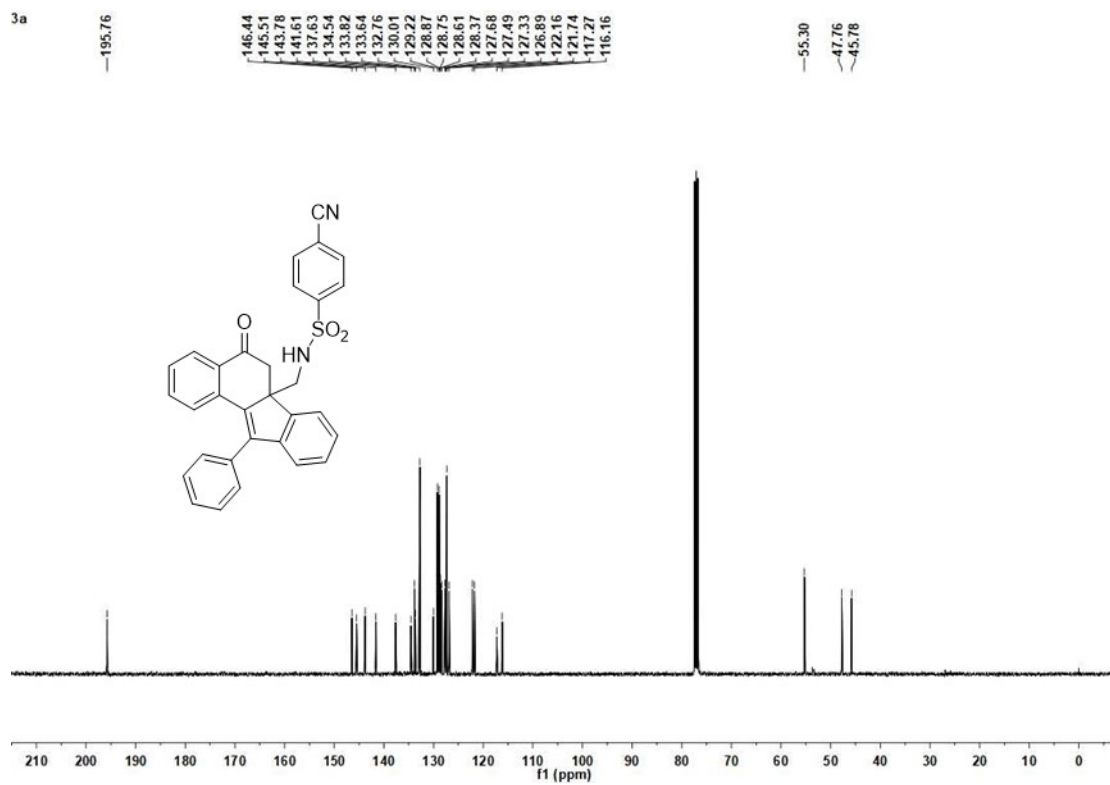

<sup>1</sup>H NMR spectrum of 3a

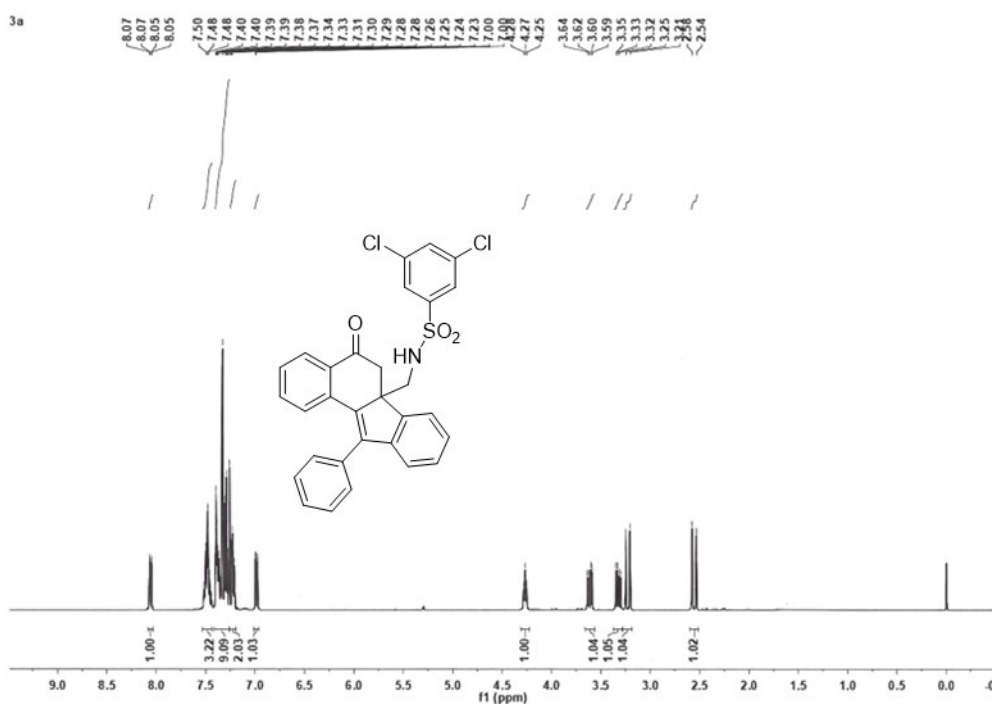

<sup>13</sup>C NMR spectrum of 3a

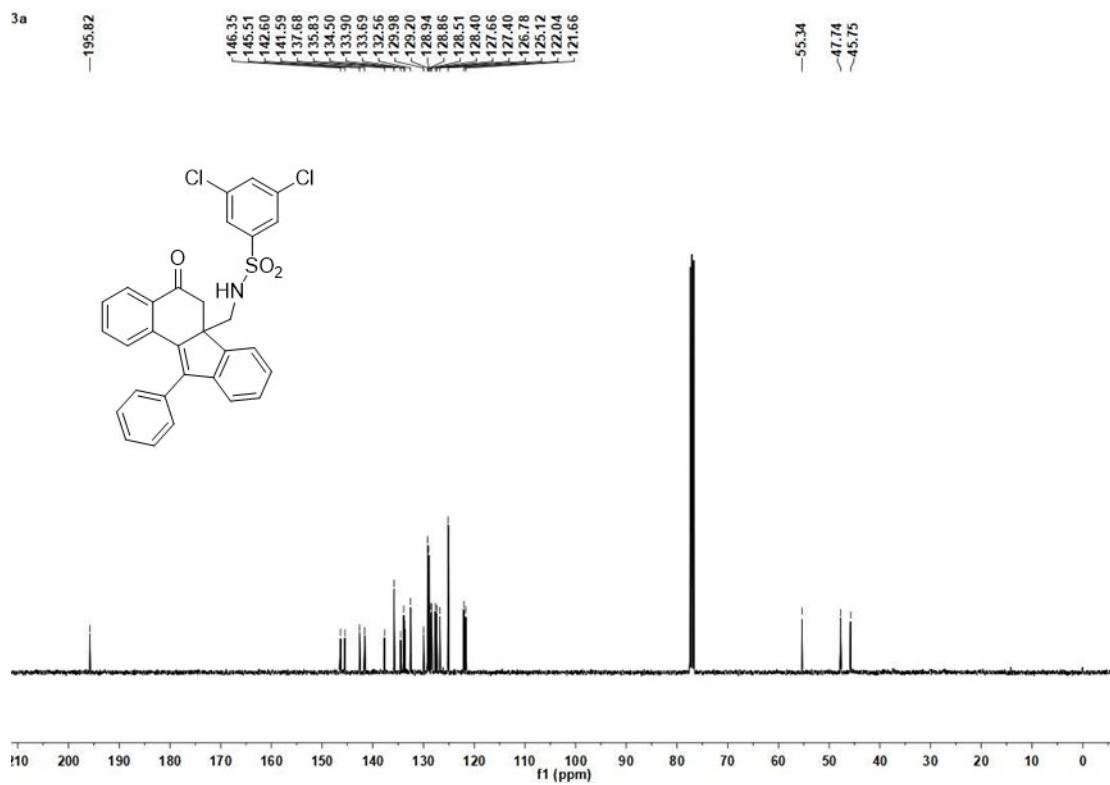

<sup>1</sup>H NMR spectrum of 3am

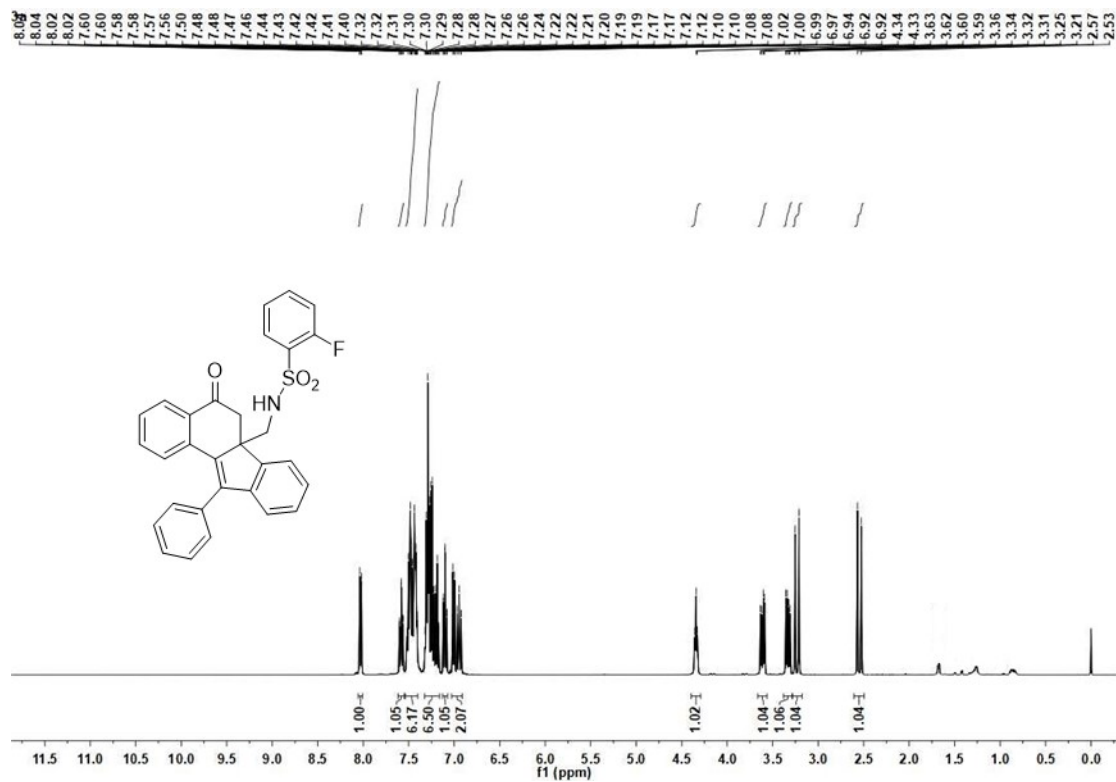

<sup>13</sup>C NMR spectrum of 3am

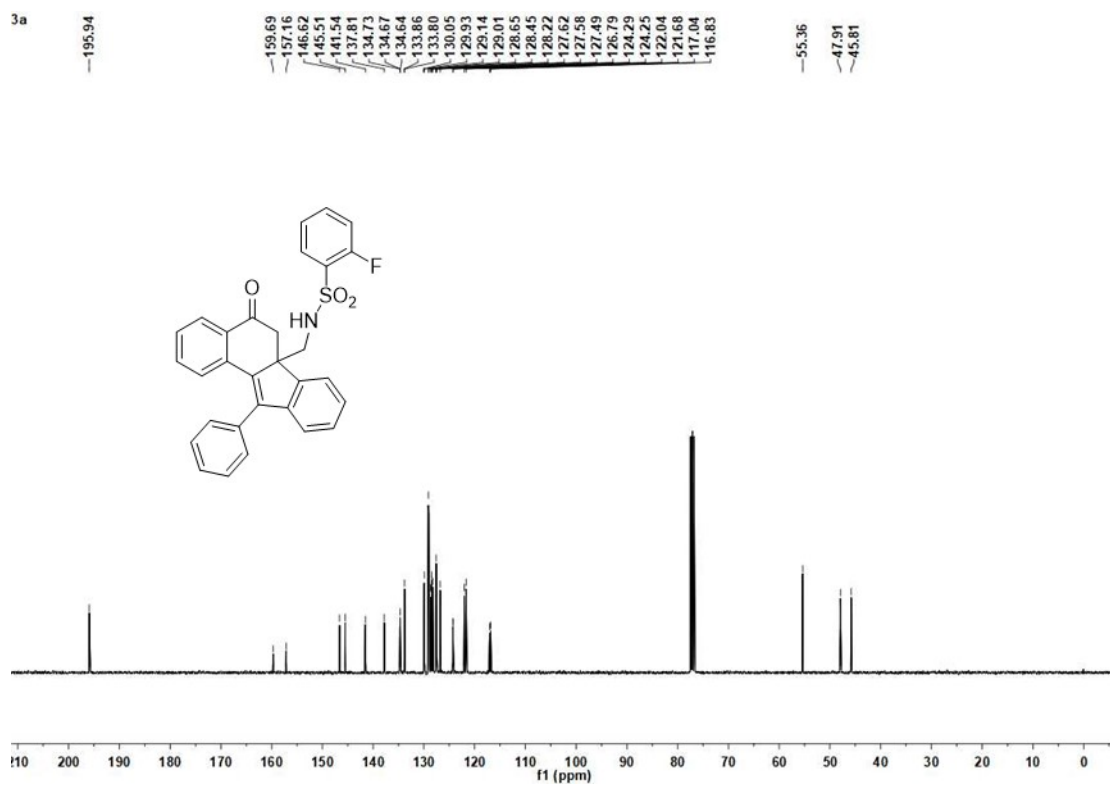

<sup>19</sup>F NMR spectrum of **3am**

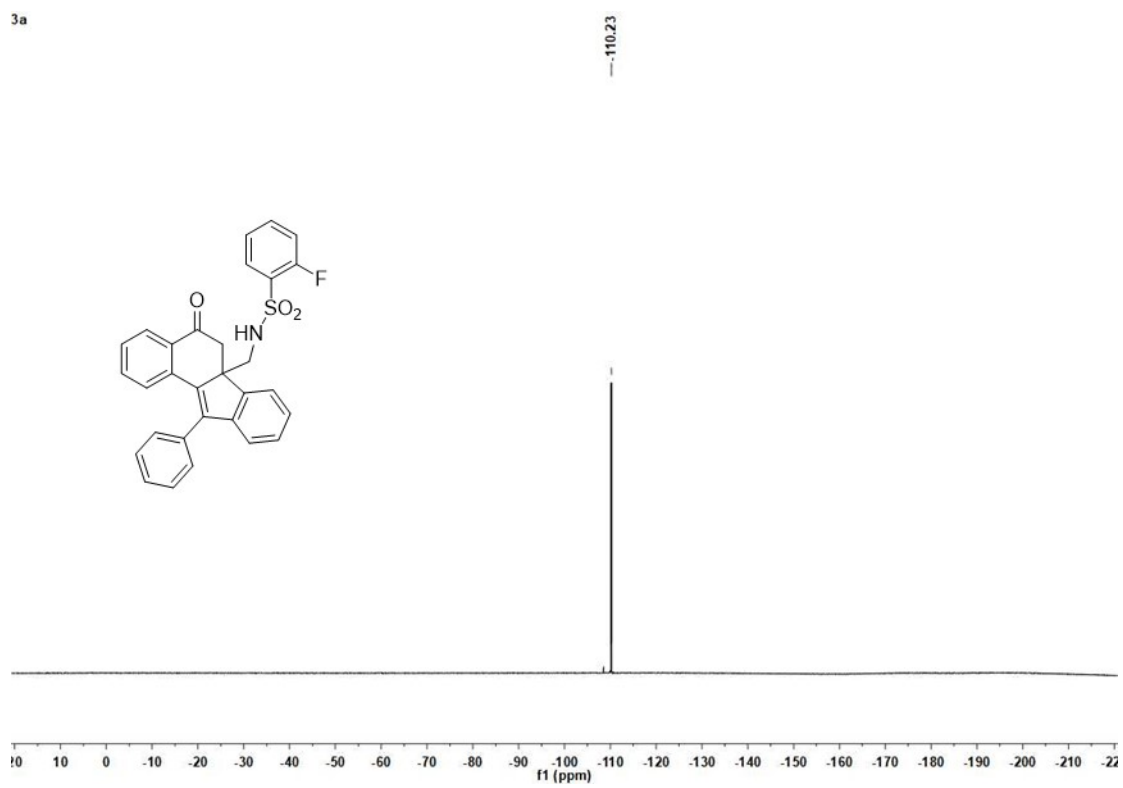

<sup>1</sup>H NMR spectrum of **3an**

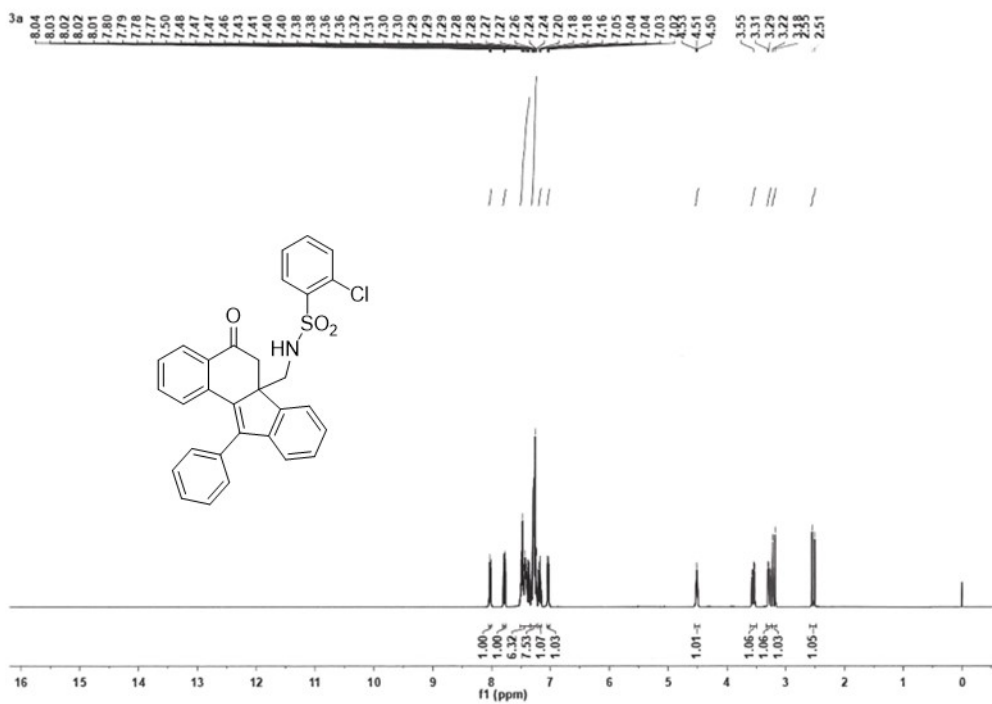

$^{13}\text{C}$  NMR spectrum of **3an**

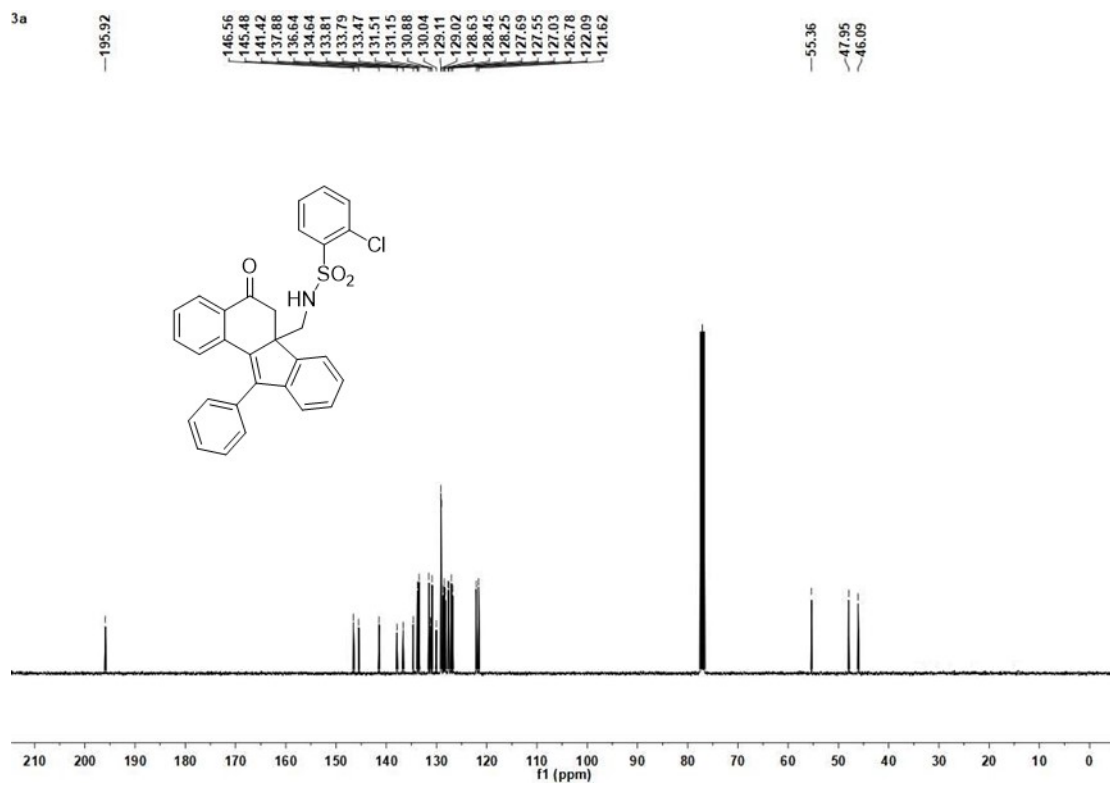

### <sup>1</sup>H NMR spectrum of 3a

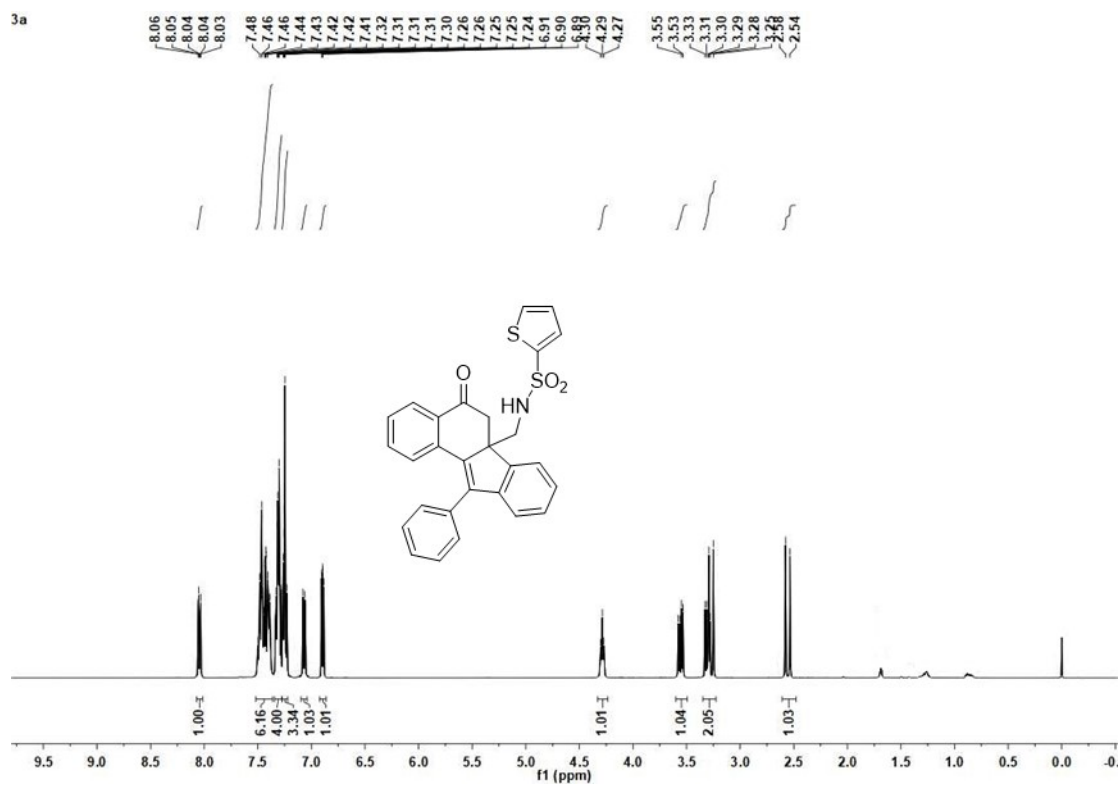

### <sup>13</sup>C NMR spectrum of 3a

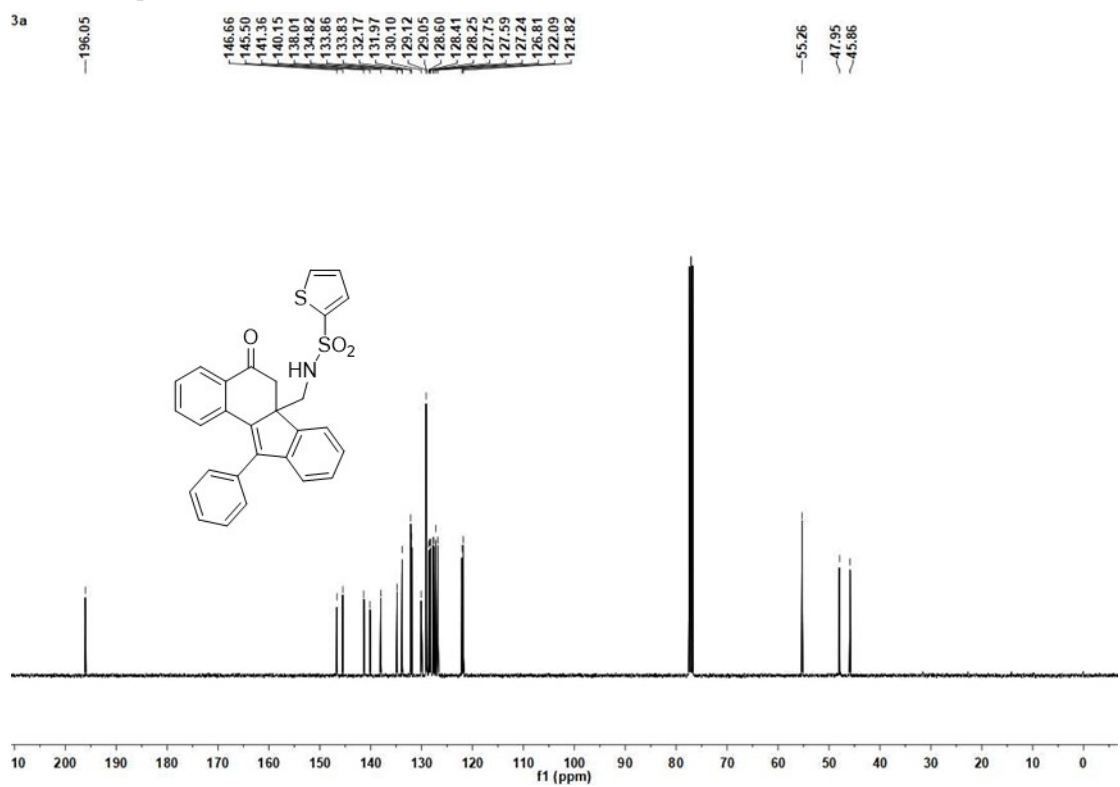

### <sup>1</sup>H NMR spectrum of **3ba**

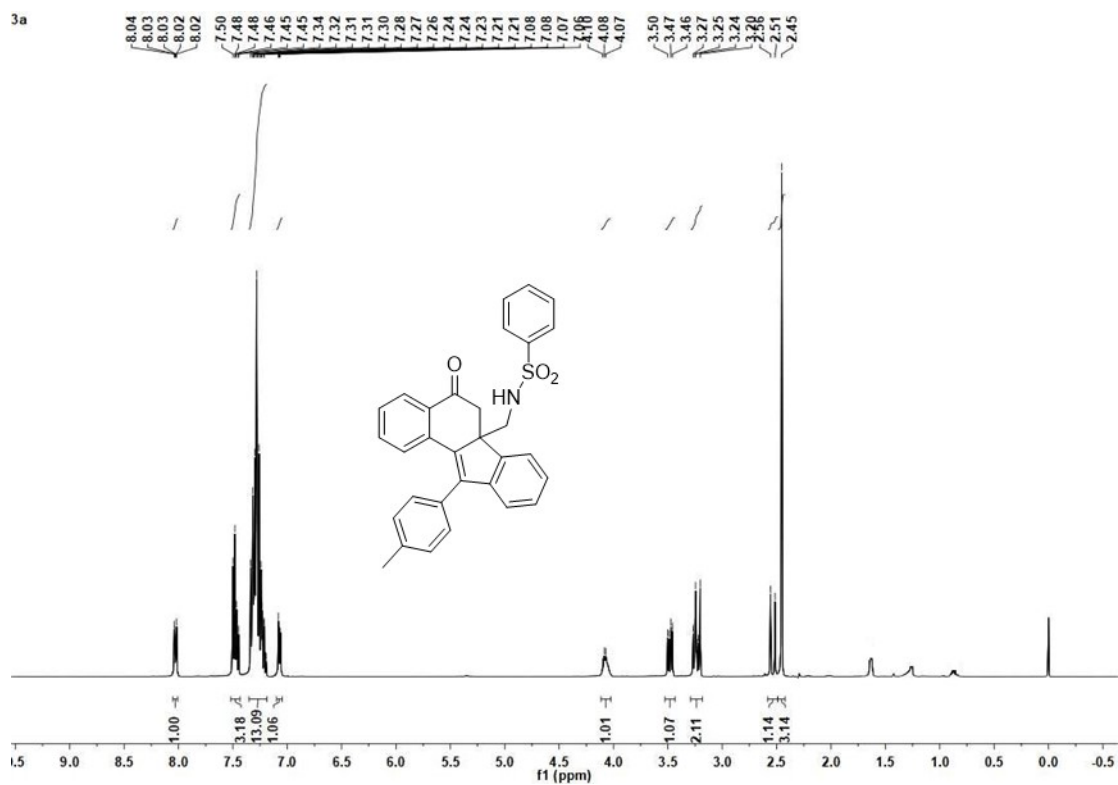

### <sup>13</sup>C NMR spectrum of **3ba**

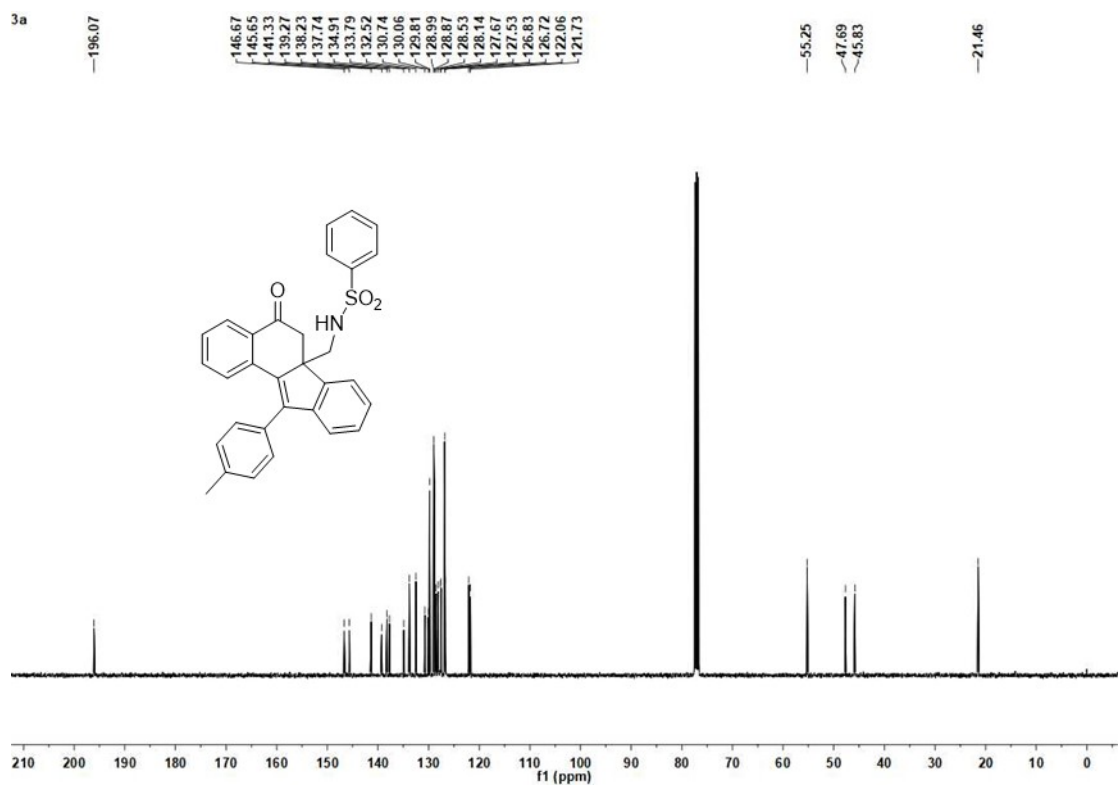

### <sup>1</sup>H NMR spectrum of **3bb**

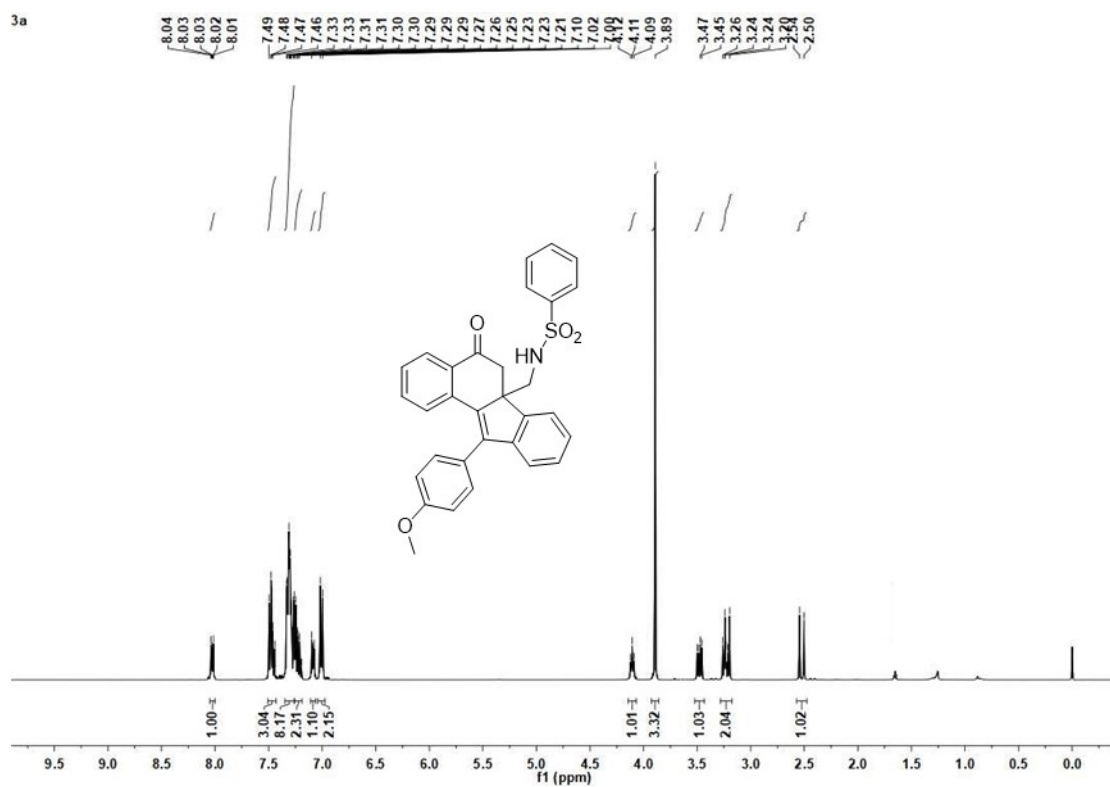

<sup>13</sup>C NMR spectrum of **3bb**

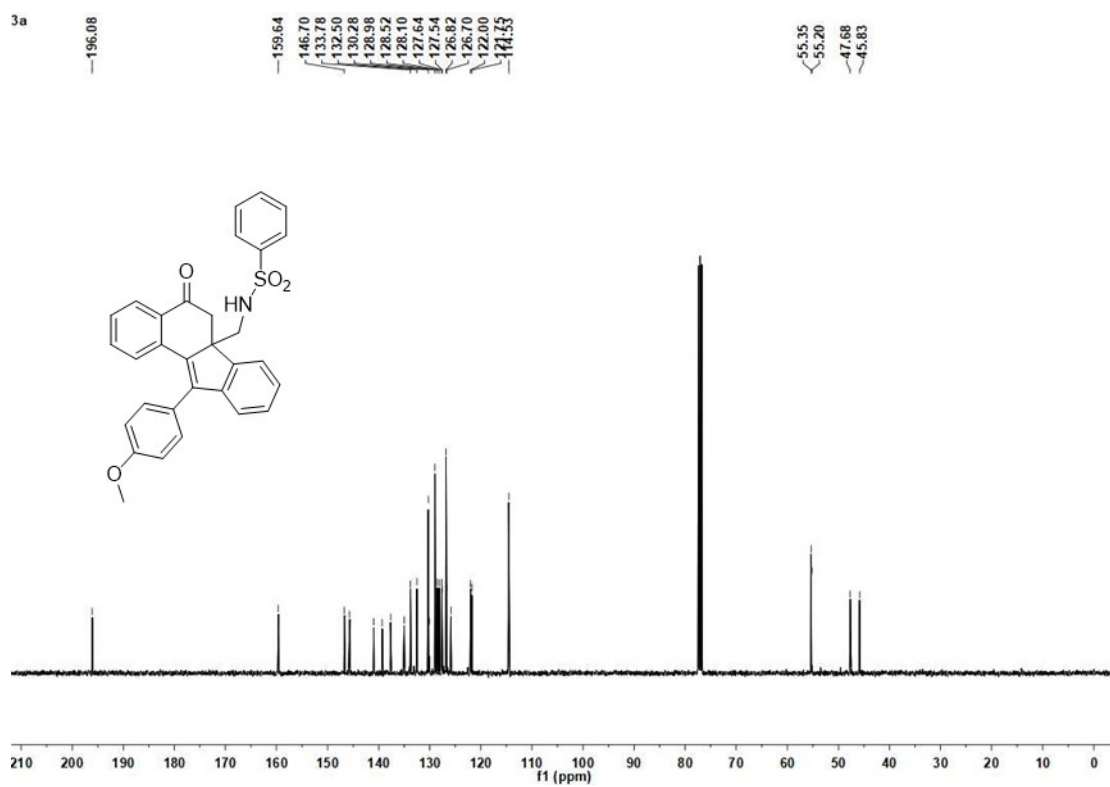

<sup>1</sup>H NMR spectrum of **3bc**

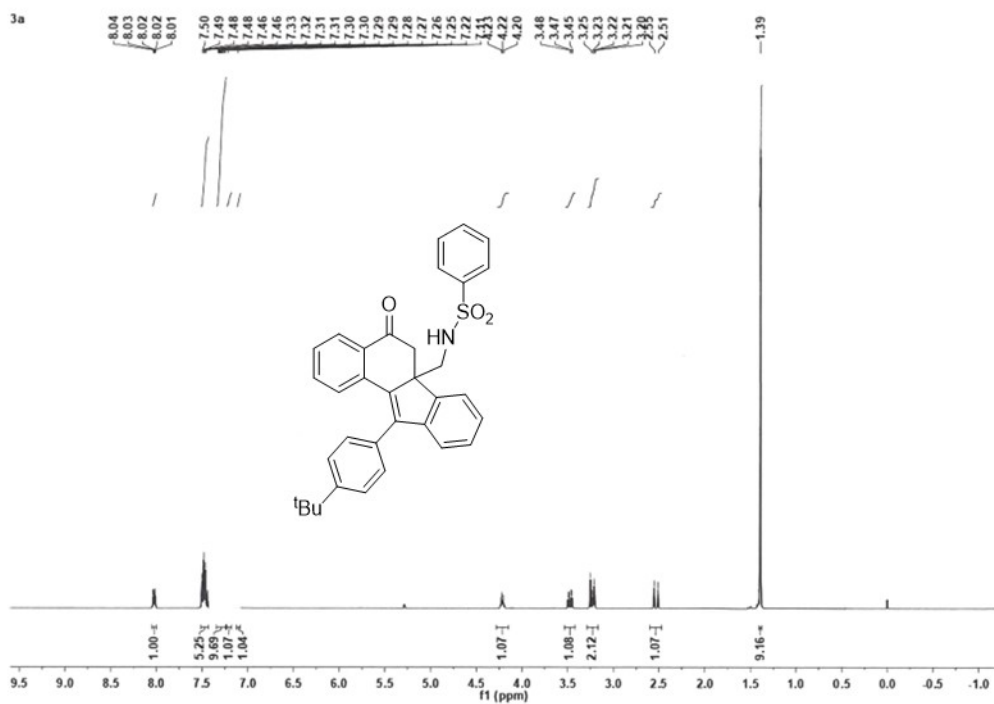

<sup>13</sup>C NMR spectrum of **3bc**

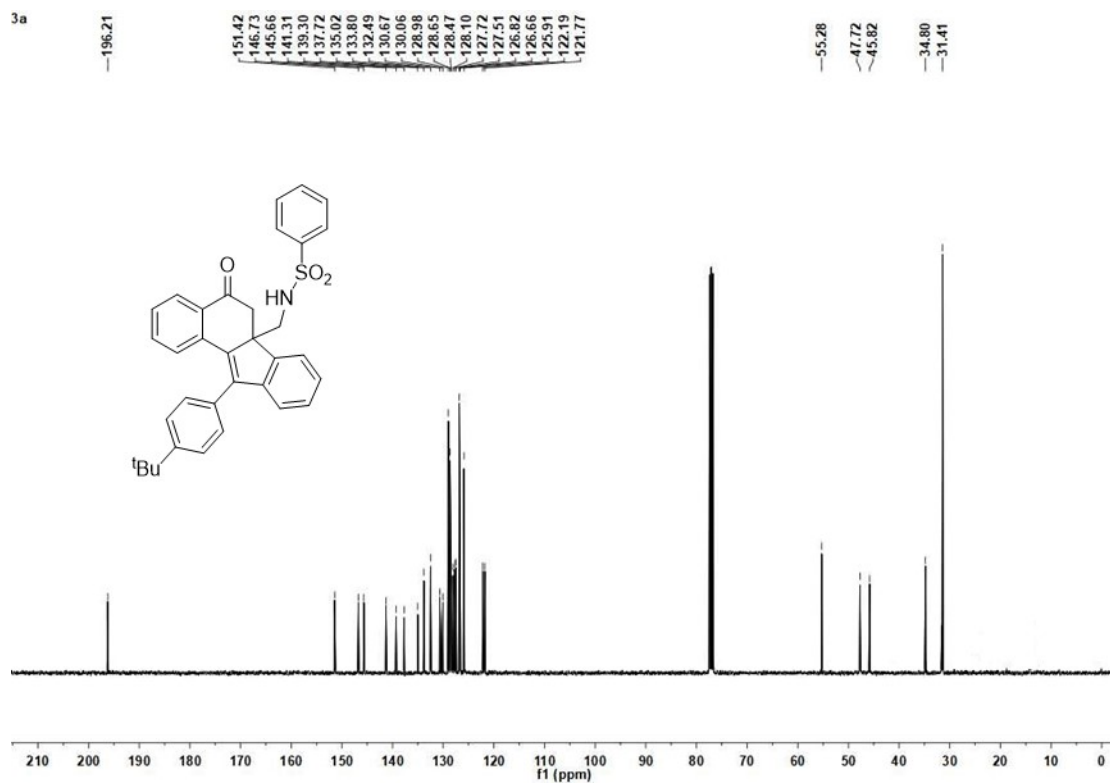

<sup>1</sup>H NMR spectrum of **3bd**

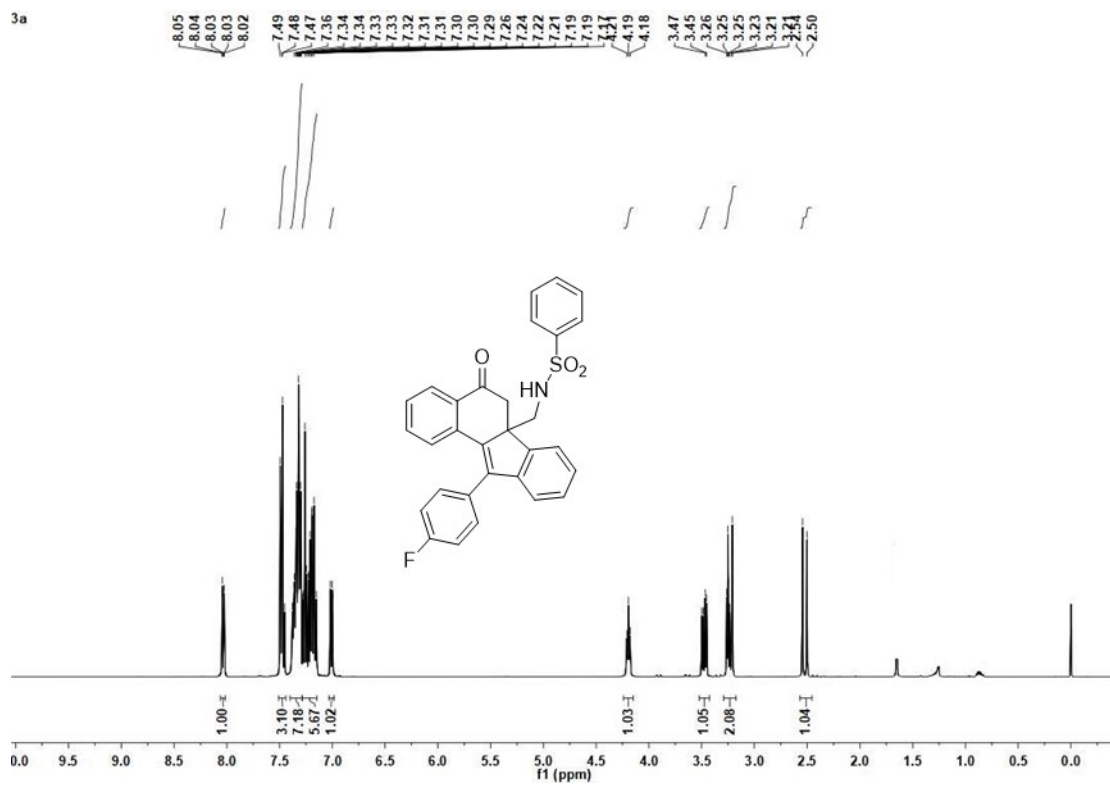

<sup>13</sup>C NMR spectrum of **3bd**

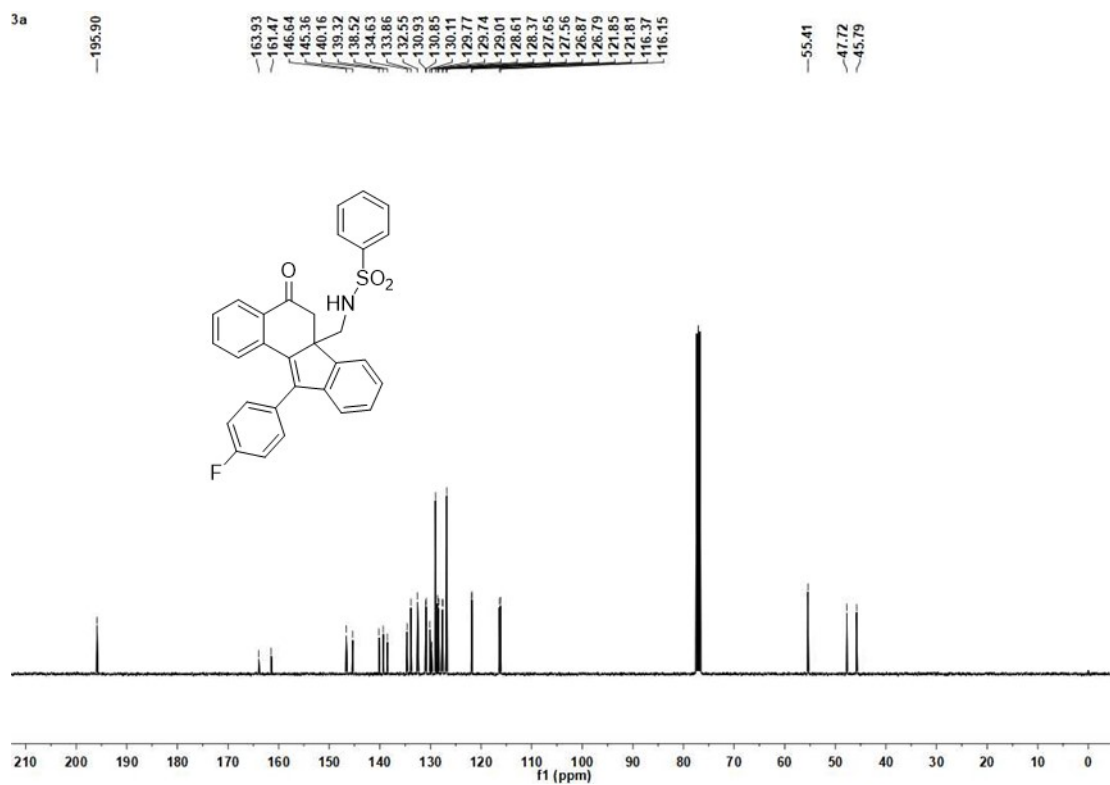

<sup>19</sup>F NMR spectrum of **3bd**

3a

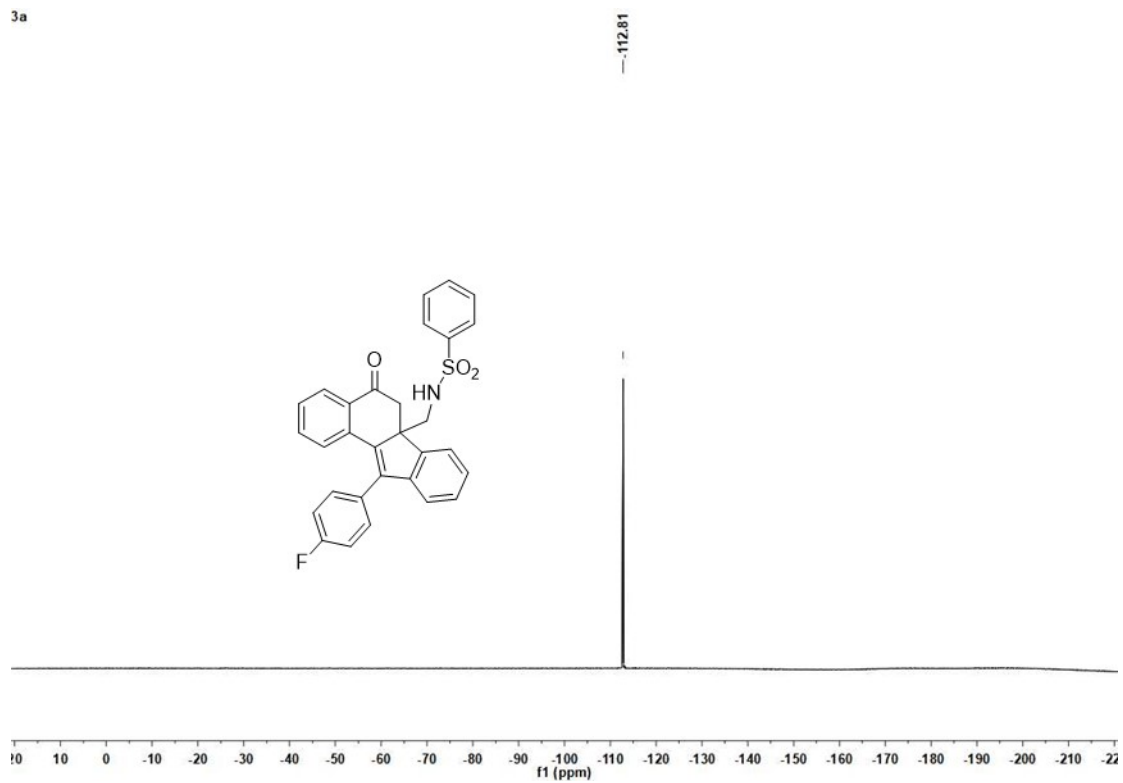

<sup>1</sup>H NMR spectrum of 3be

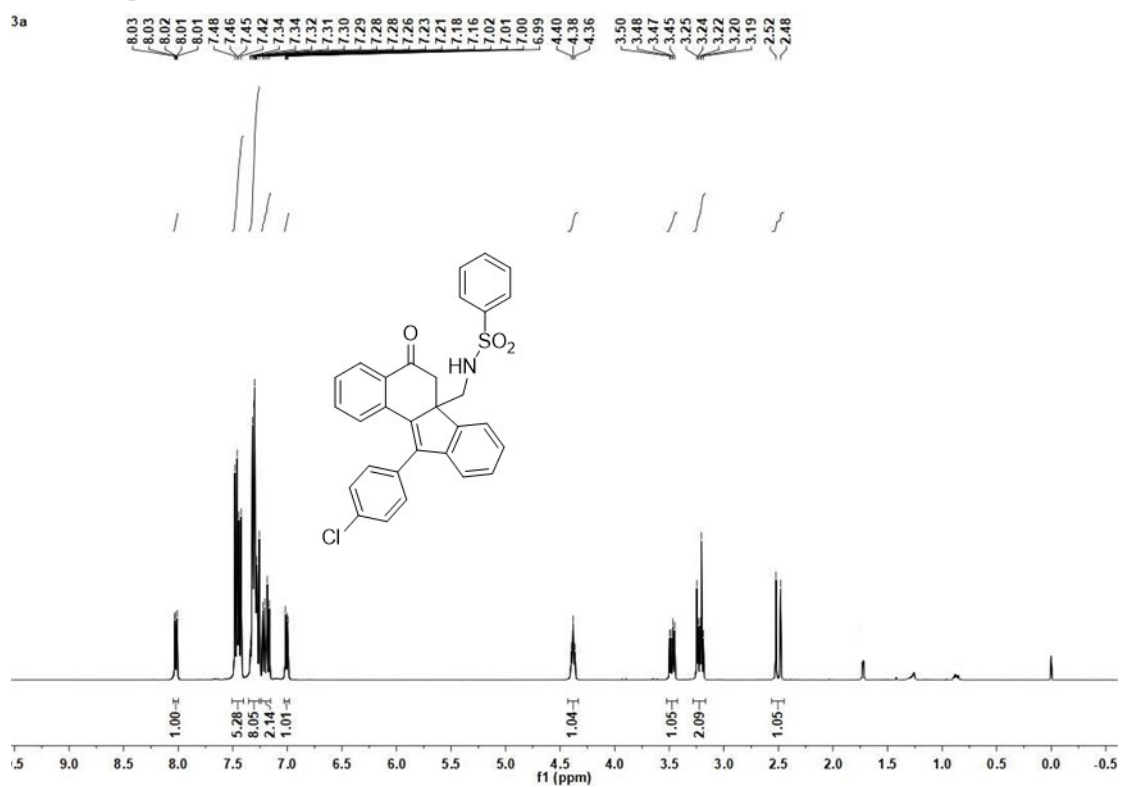

<sup>13</sup>C NMR spectrum of 3be

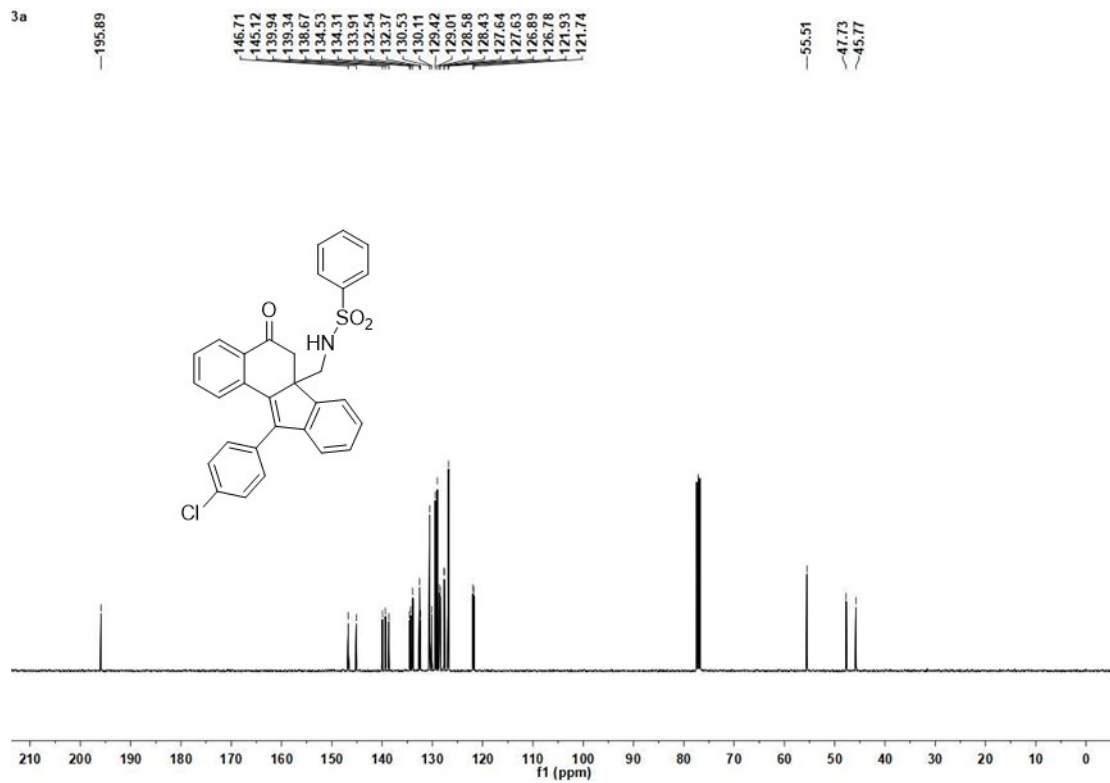

<sup>1</sup>H NMR spectrum of **3bf**

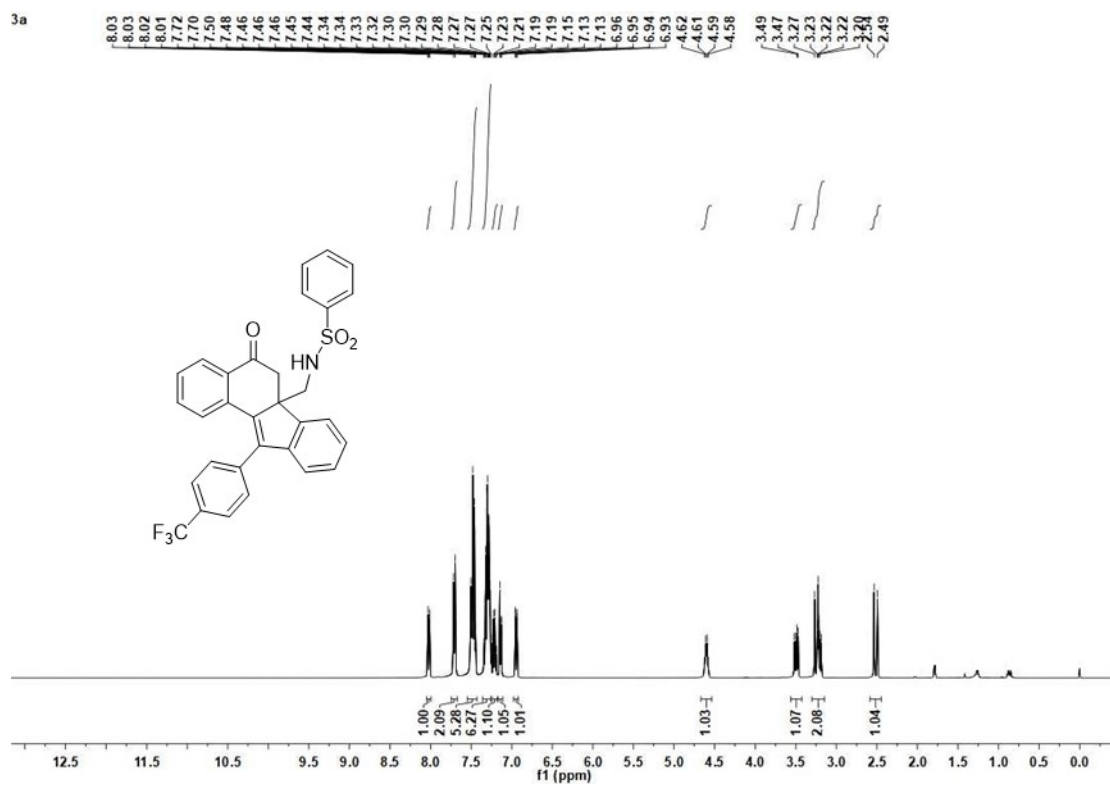

<sup>13</sup>C NMR spectrum of **3bf**

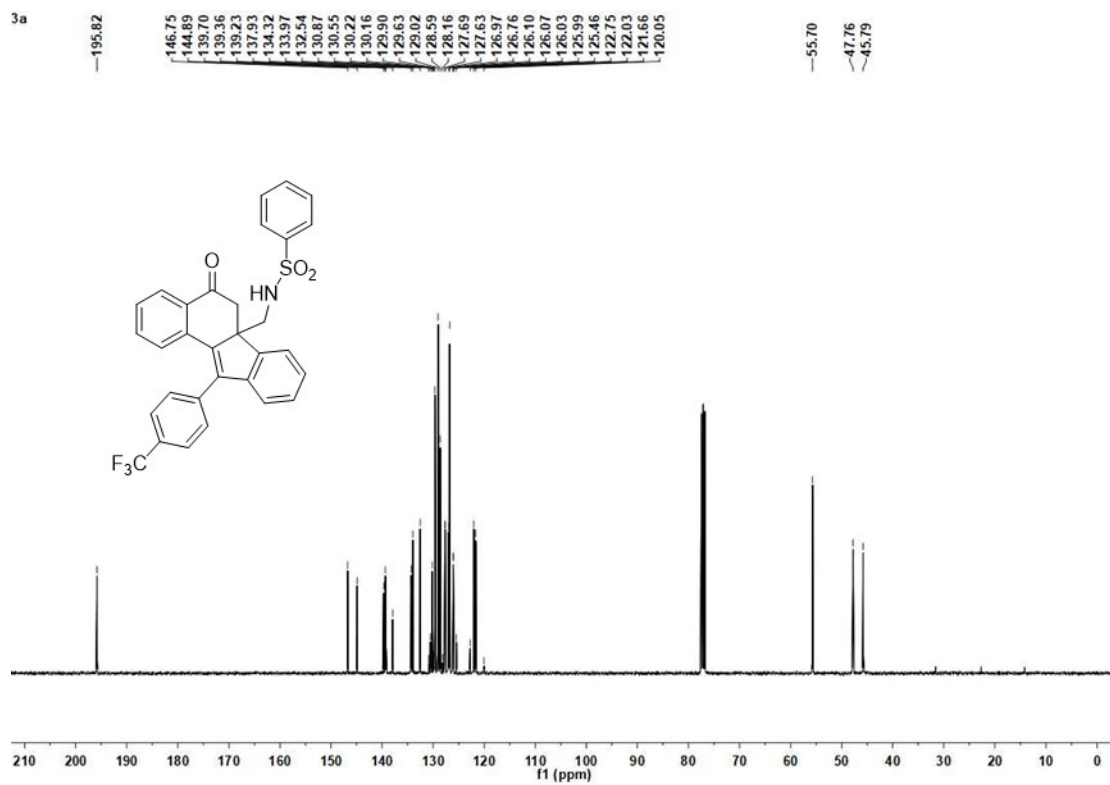

<sup>19</sup>F NMR spectrum of **3bf**

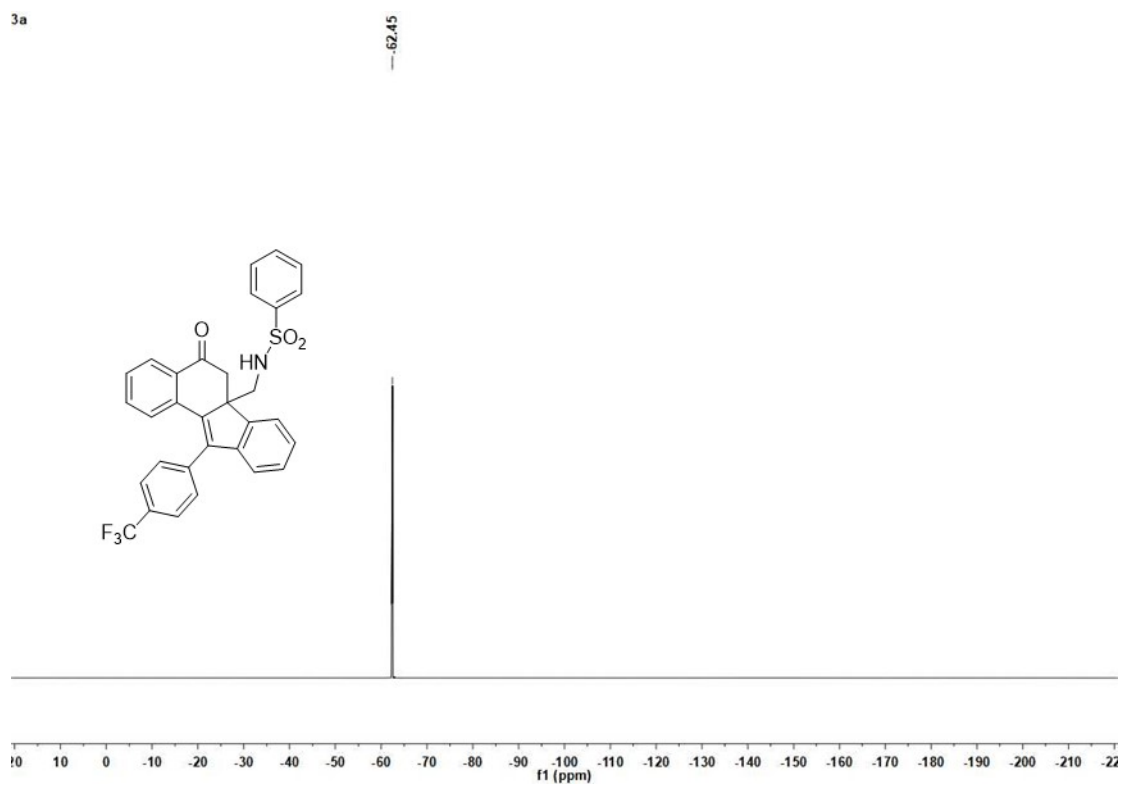

<sup>1</sup>H NMR spectrum of **3bg**

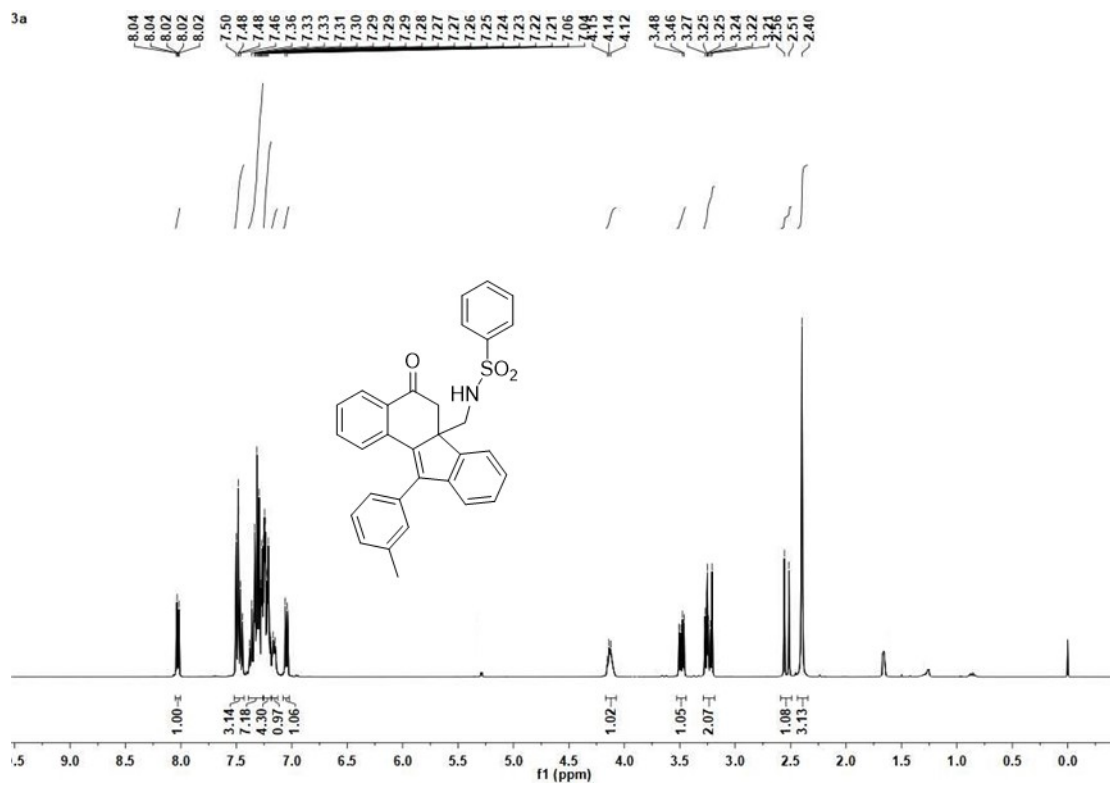

<sup>13</sup>C NMR spectrum of **3bg**

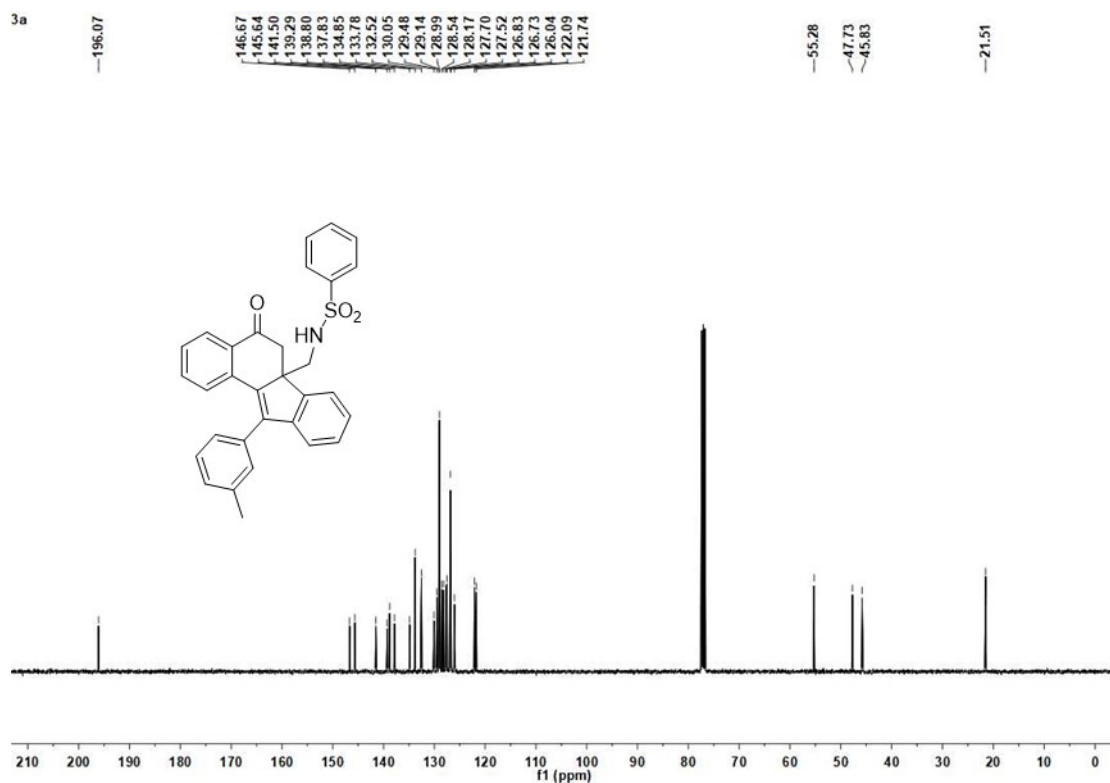

<sup>1</sup>H NMR spectrum of **3bh**

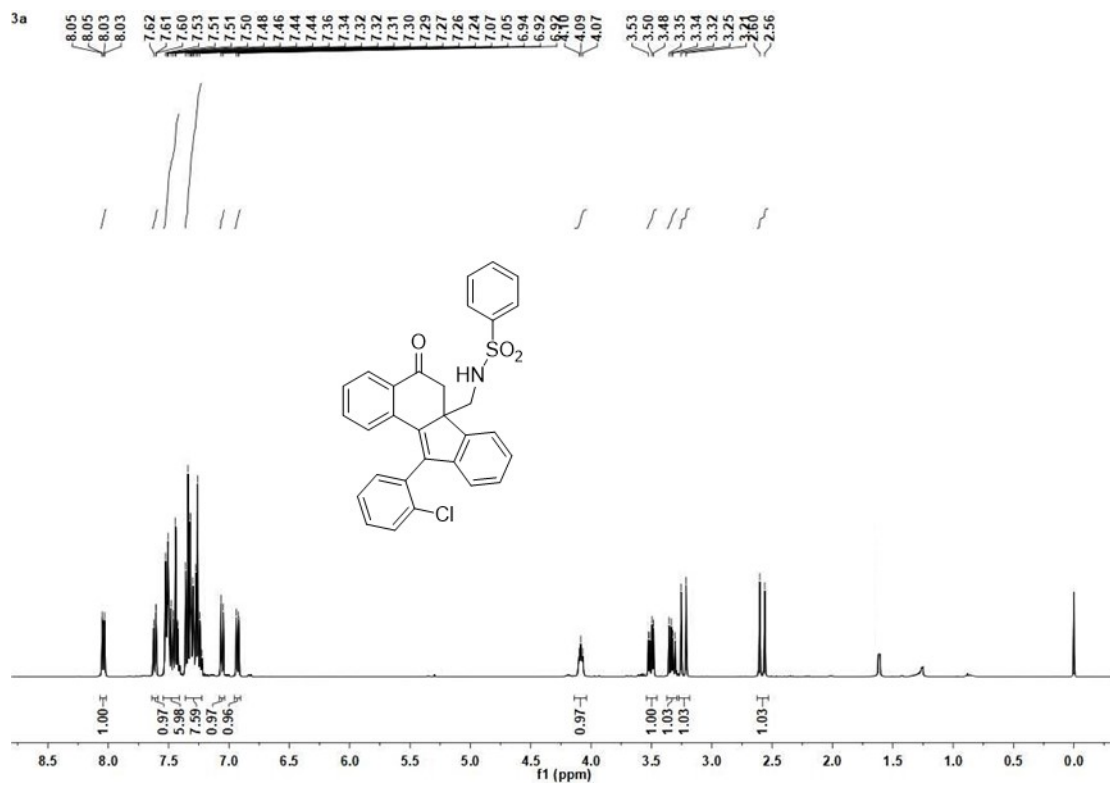

<sup>13</sup>C NMR spectrum of **3bh**

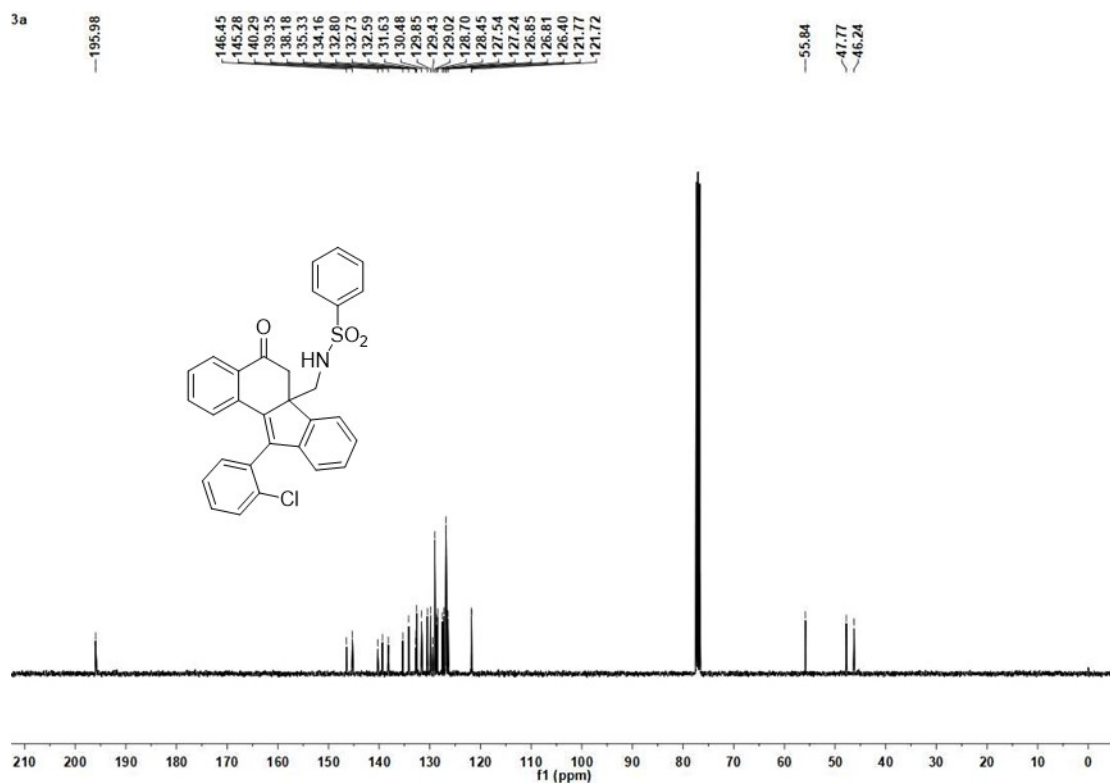

<sup>1</sup>H NMR spectrum of **3bi**

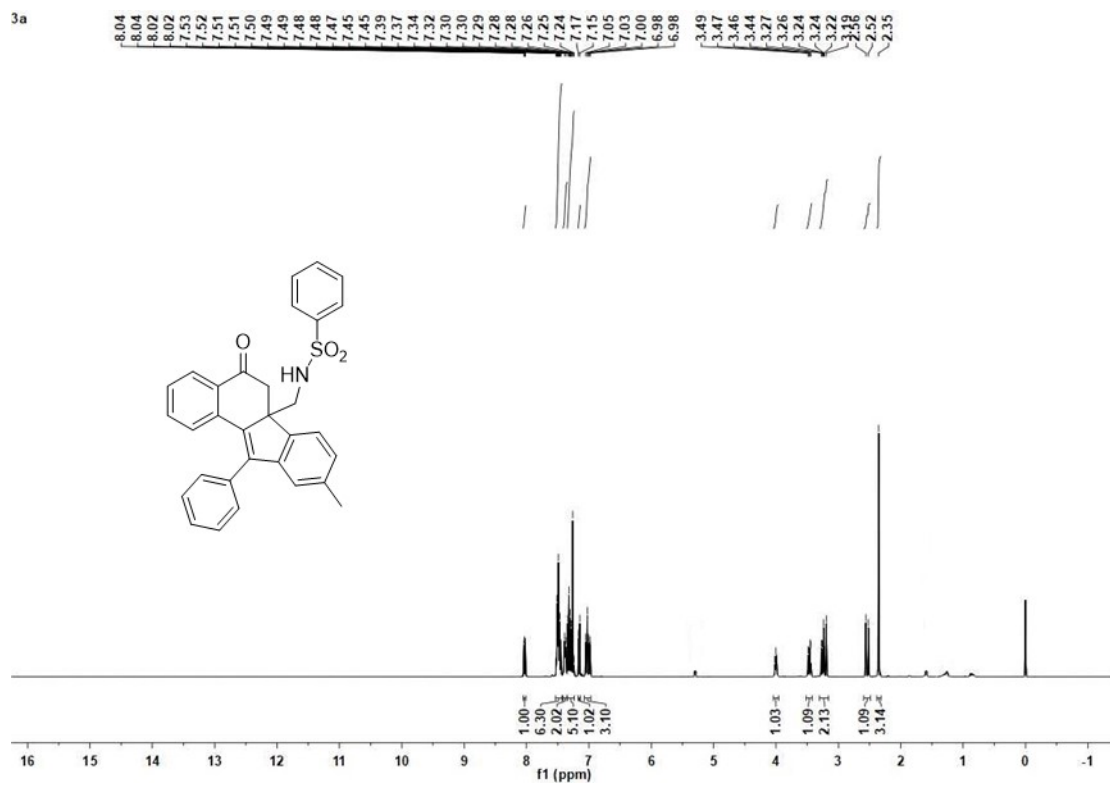

<sup>13</sup>C NMR spectrum of 3bi

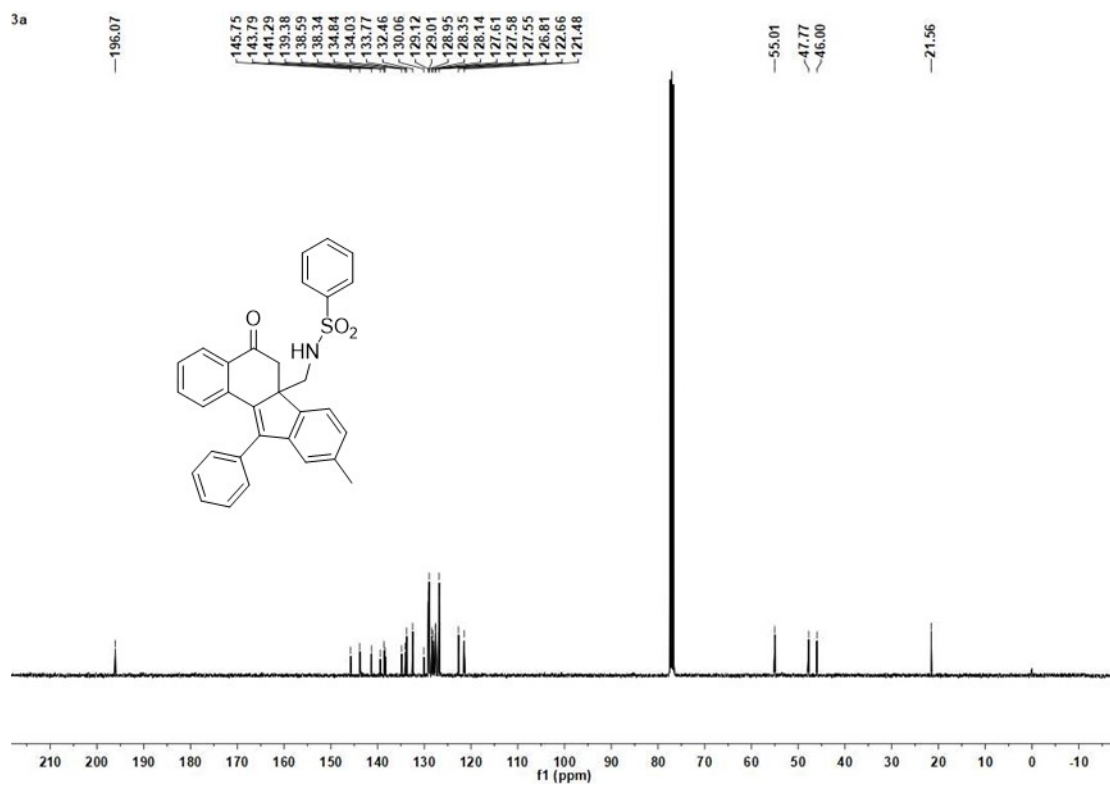

<sup>1</sup>H NMR spectrum of 3bj

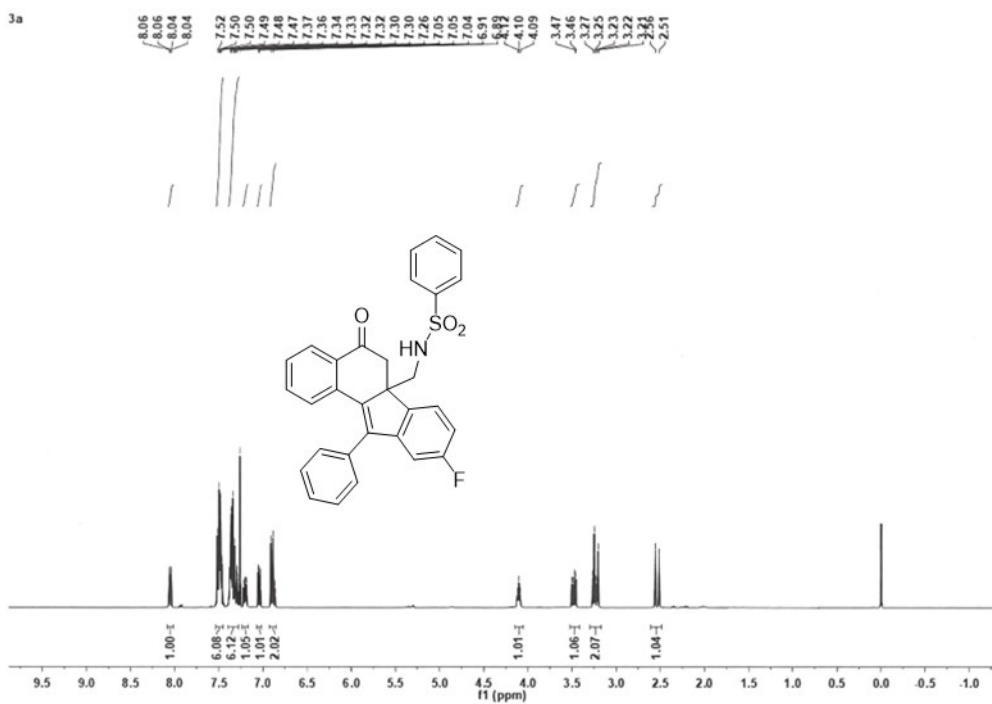

<sup>13</sup>C NMR spectrum of **3bj**

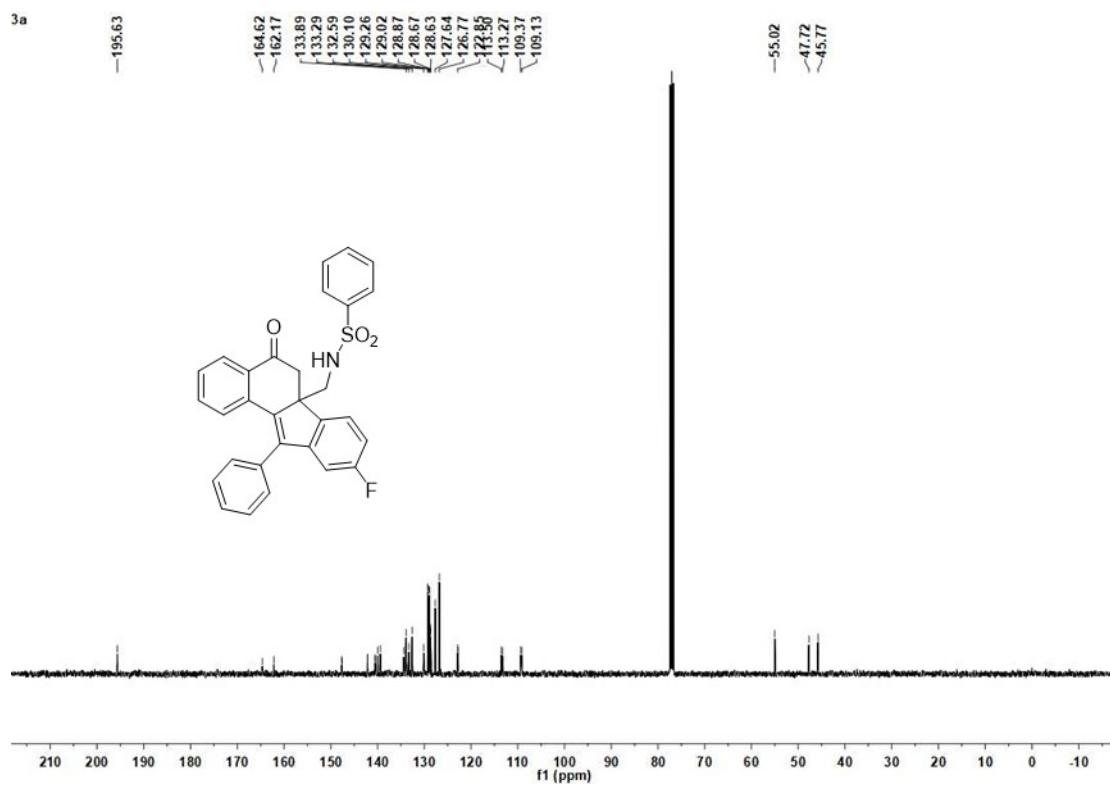

<sup>19</sup>F NMR spectrum of **3bj**

3a

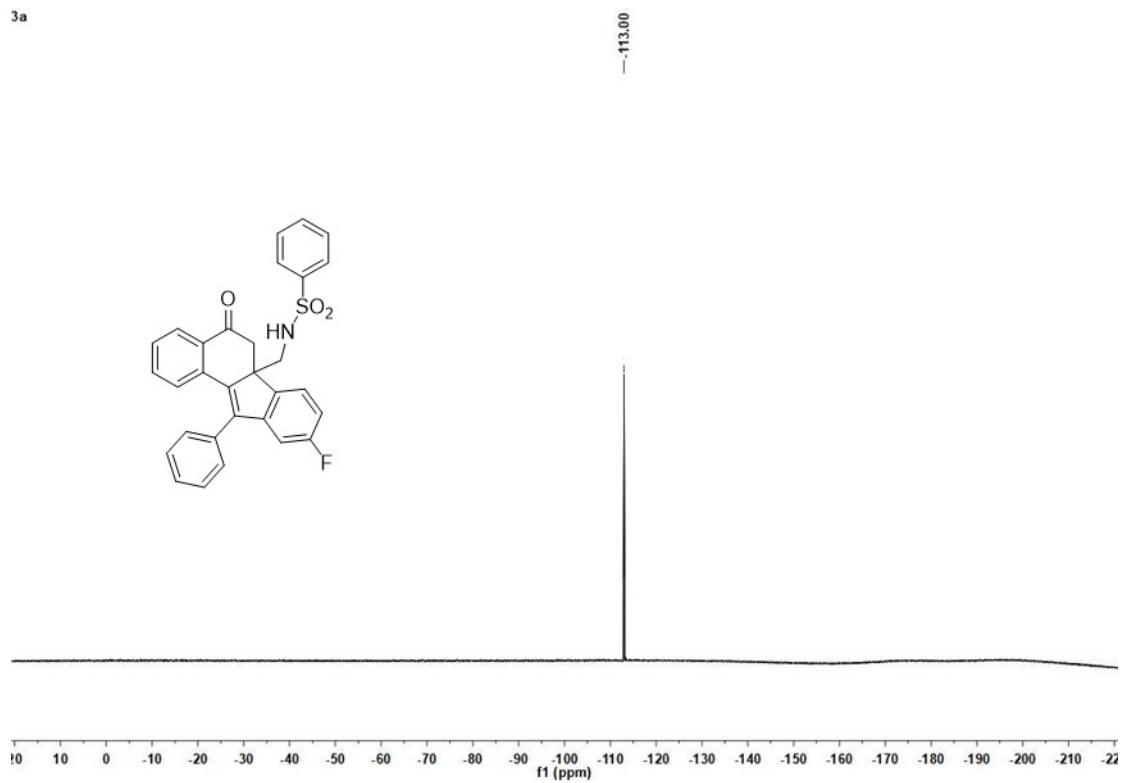

<sup>1</sup>H NMR spectrum of **3bk**

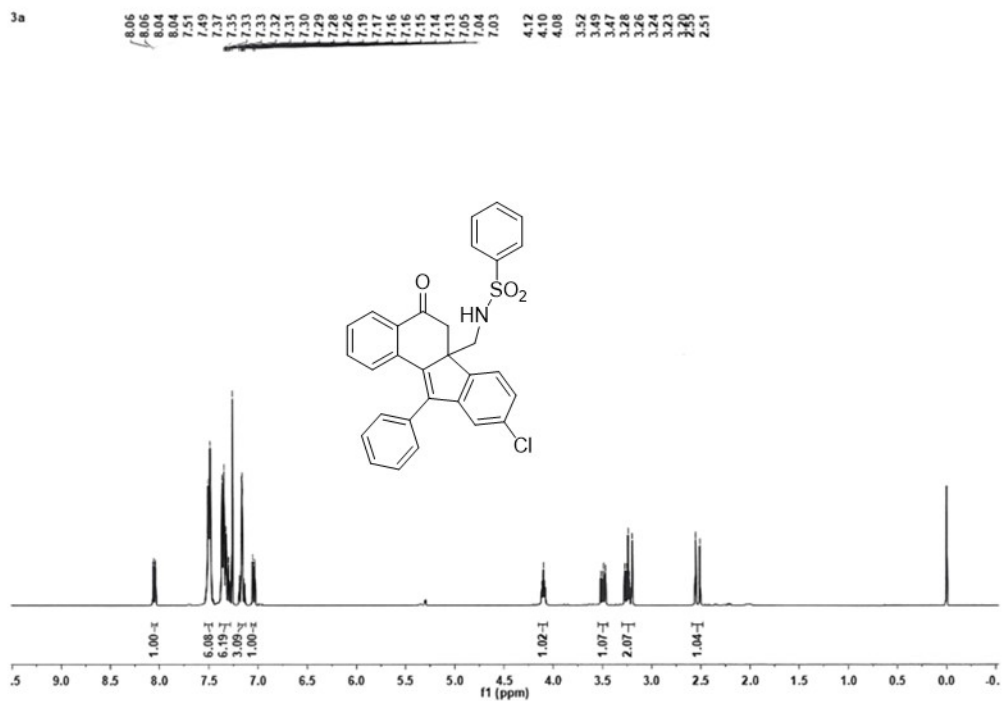

<sup>13</sup>C NMR spectrum of **3bk**

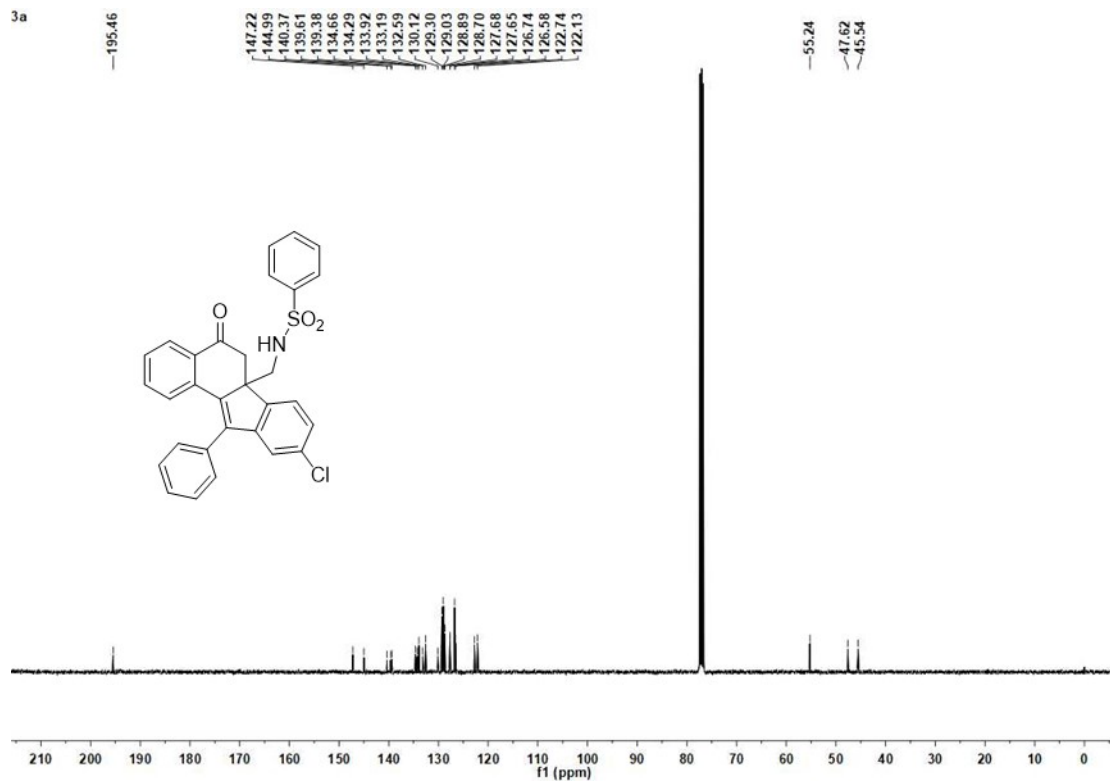

<sup>1</sup>H NMR spectrum of 3bl

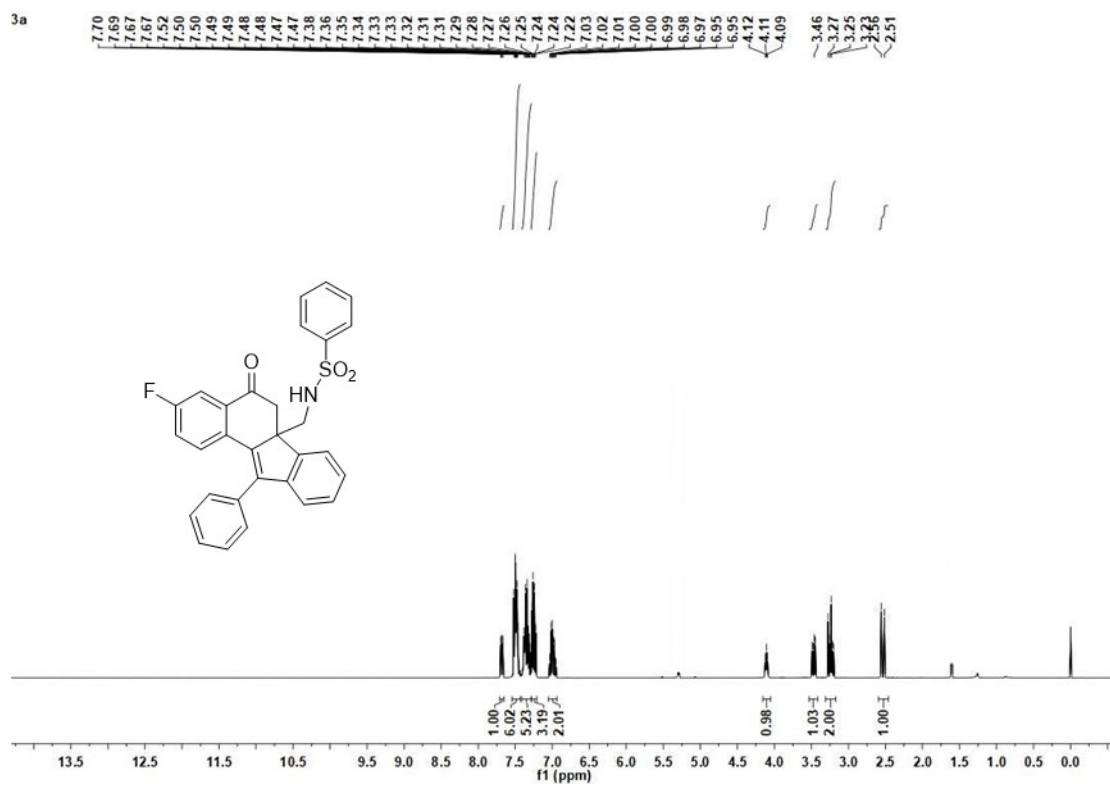

<sup>13</sup>C NMR spectrum of 3bl

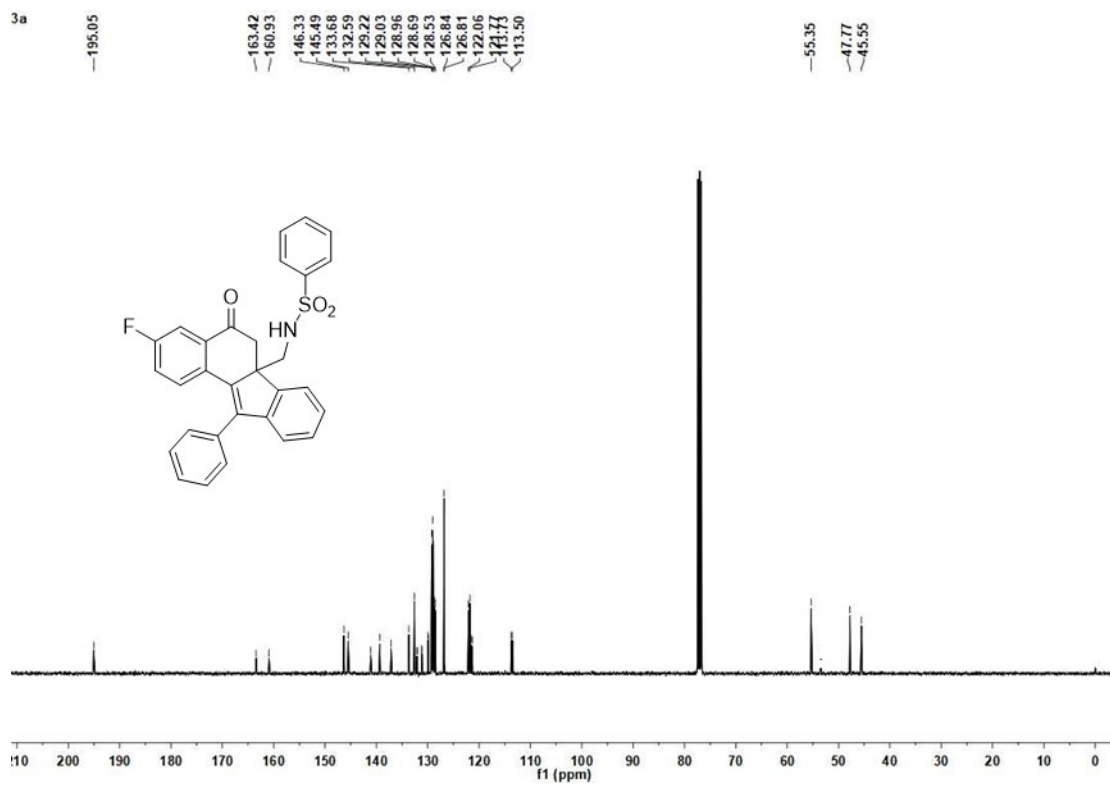

$^{19}\text{F}$  NMR spectrum of **3bl**

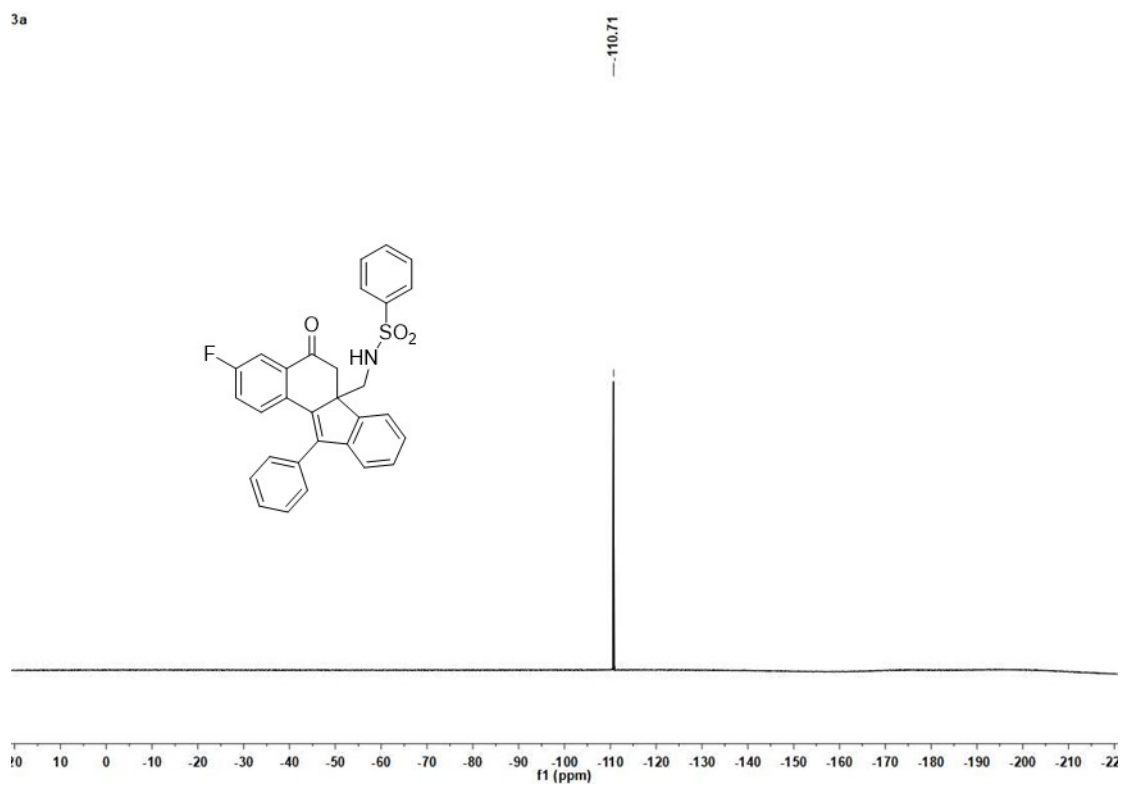

$^1\text{H}$  NMR spectrum of **3bm**

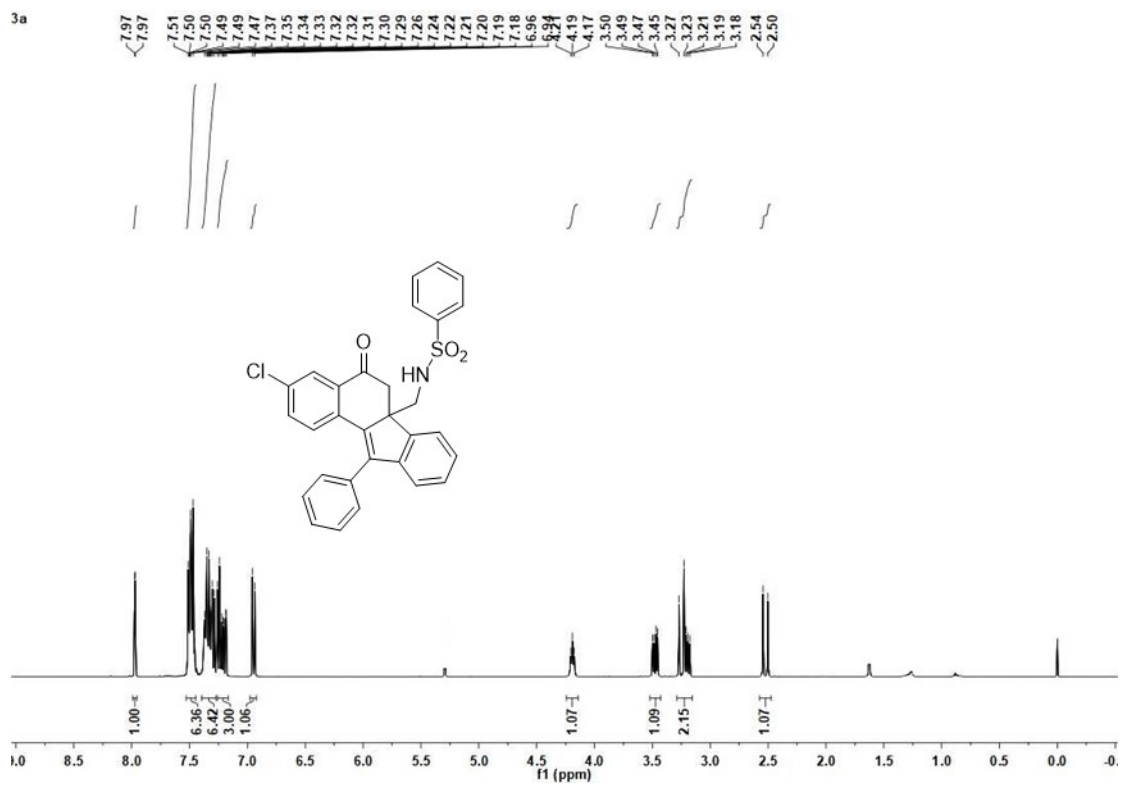

<sup>13</sup>C NMR spectrum of 3bm

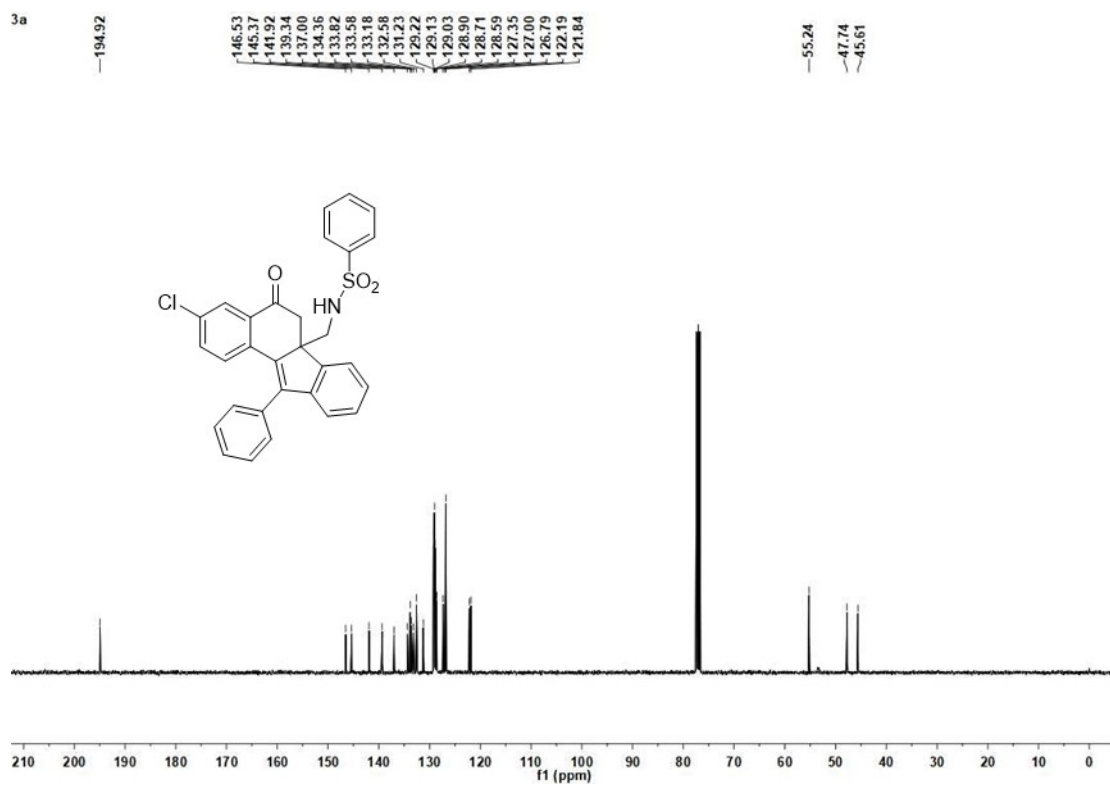

<sup>1</sup>H NMR spectrum of 3bn

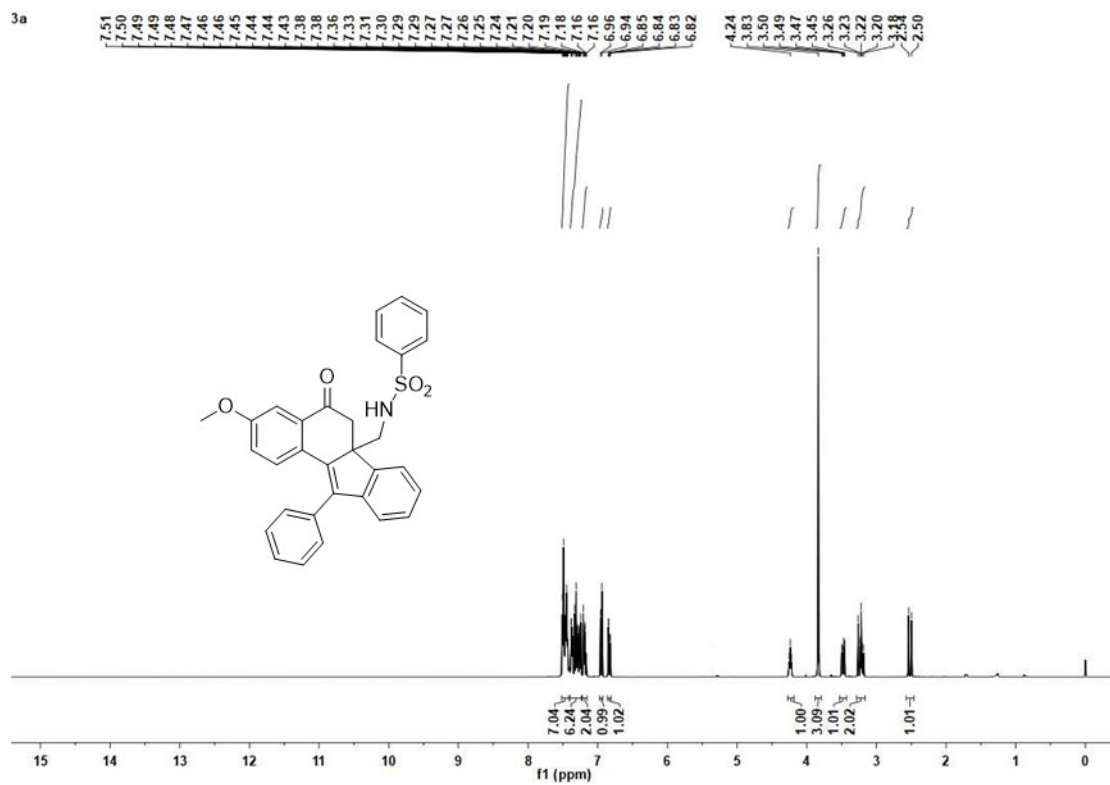

<sup>13</sup>C NMR spectrum of 3bn

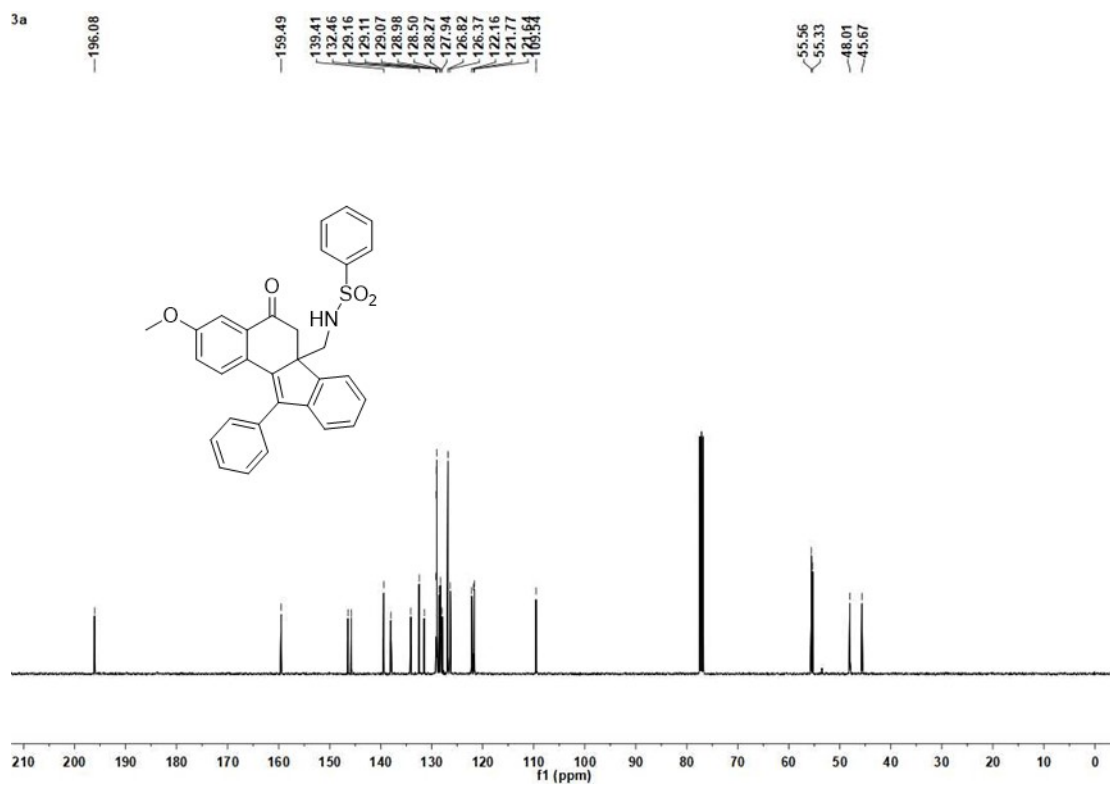

<sup>1</sup>H NMR spectrum of 3bo

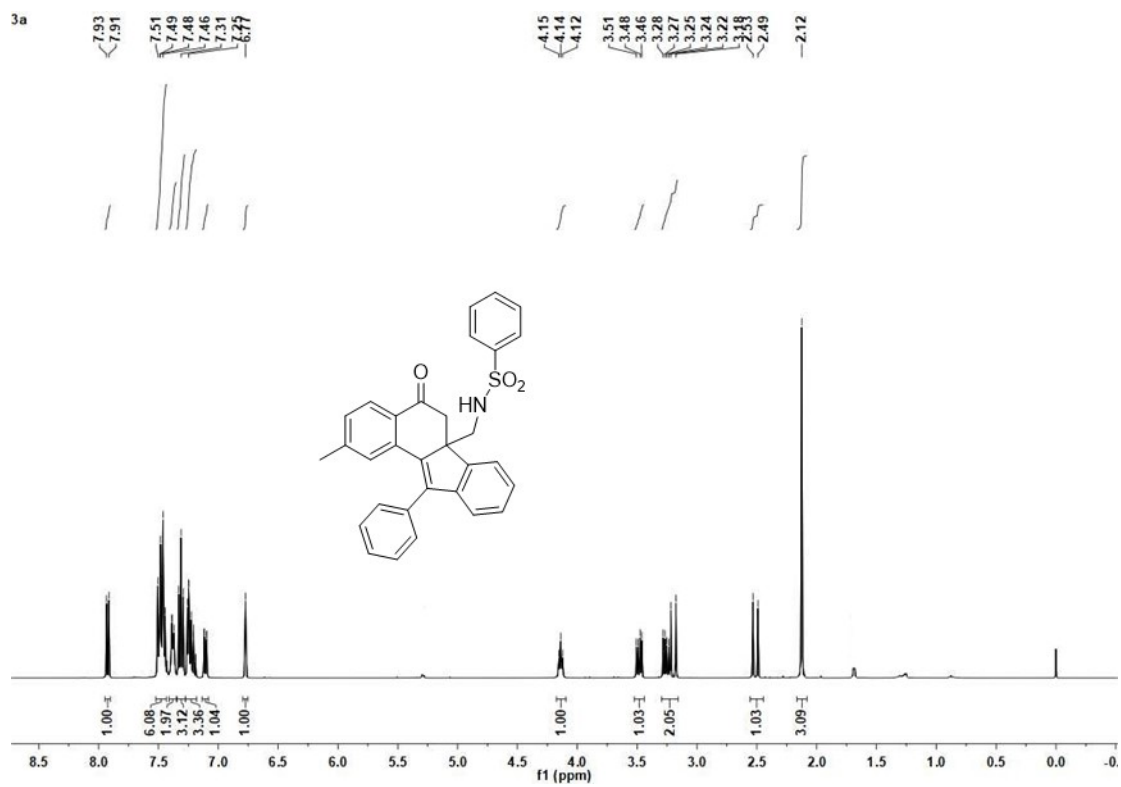

<sup>13</sup>C NMR spectrum of **3bo**

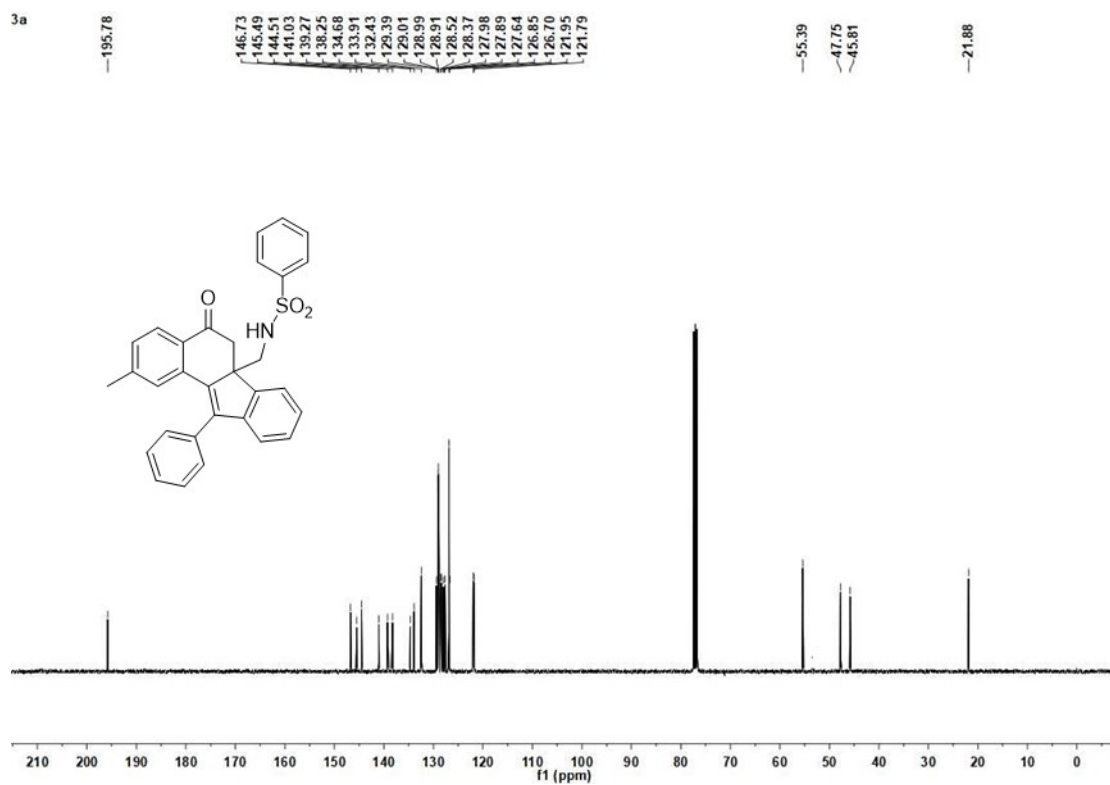

<sup>1</sup>H NMR spectrum of **3bp**

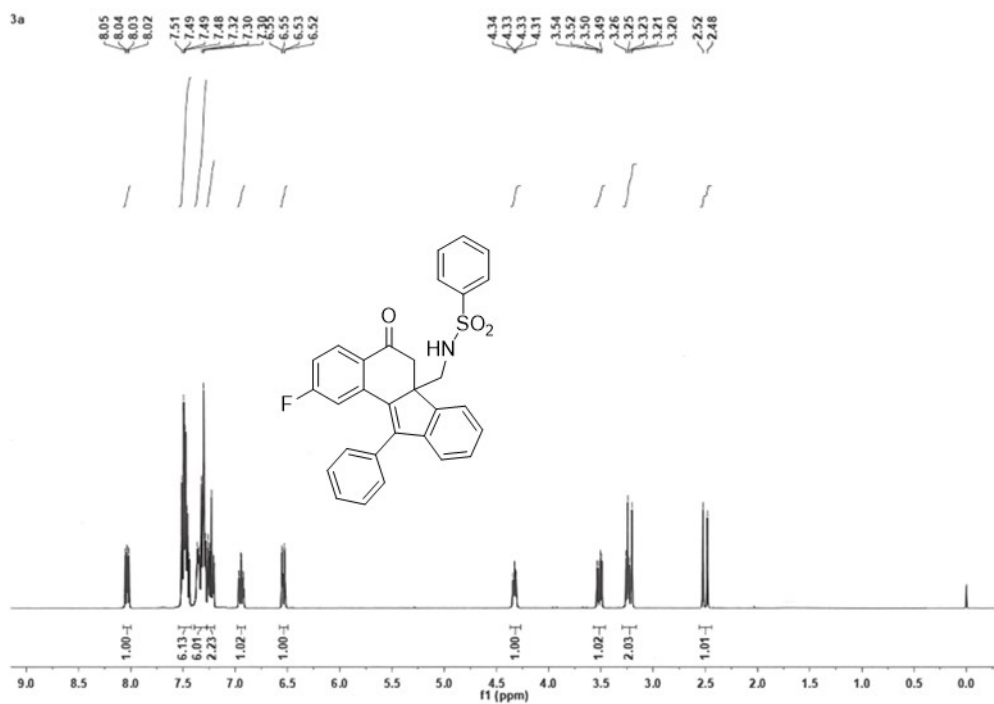

<sup>13</sup>C NMR spectrum of **3bp**

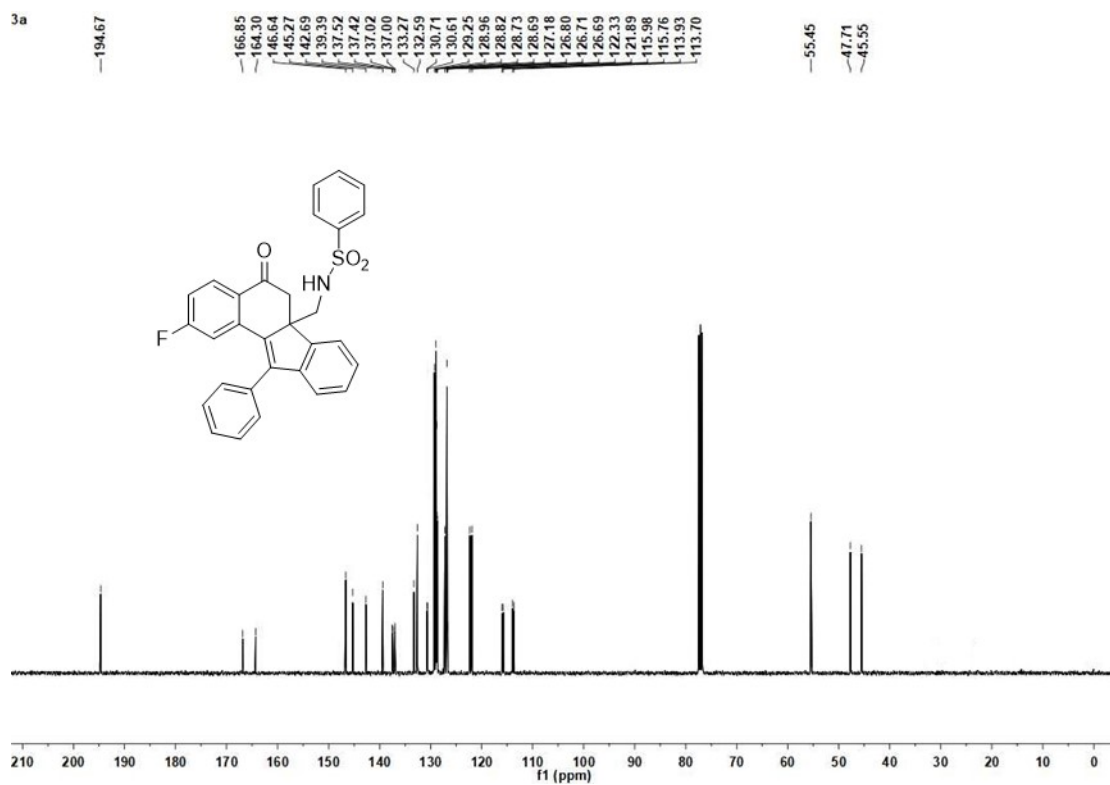

<sup>19</sup>F NMR spectrum of **3bp**

3a

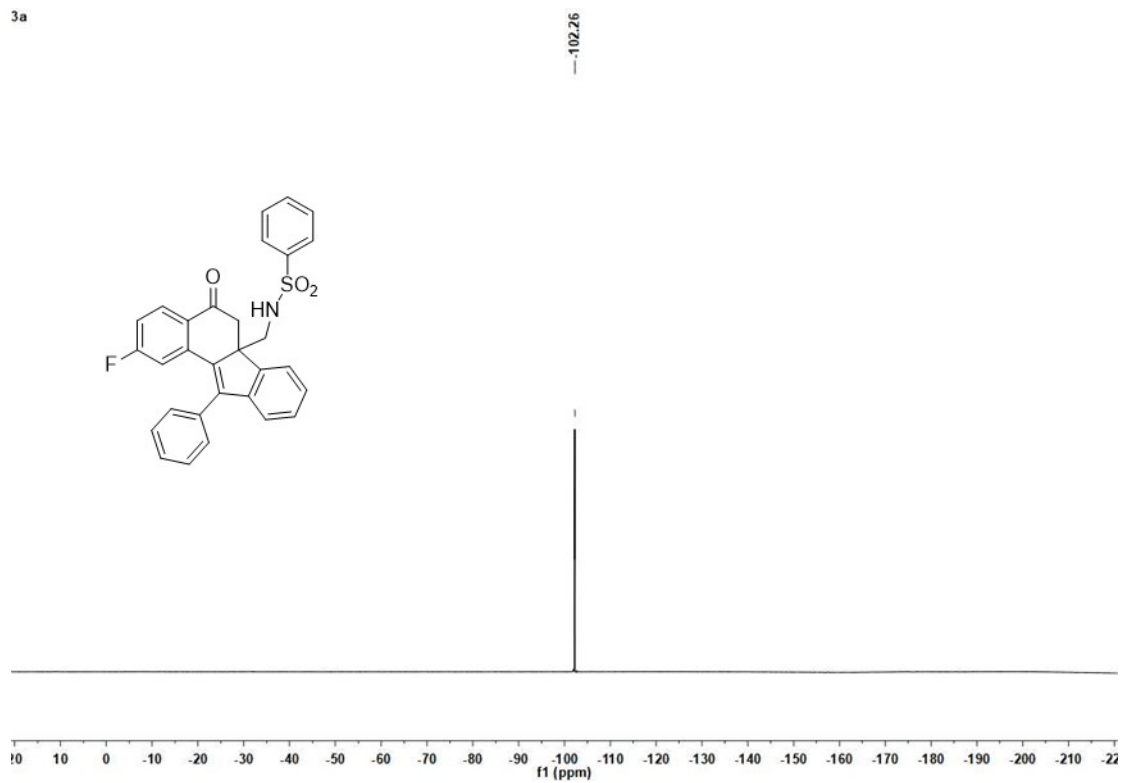

$^1\text{H}$  NMR spectrum of 3bq

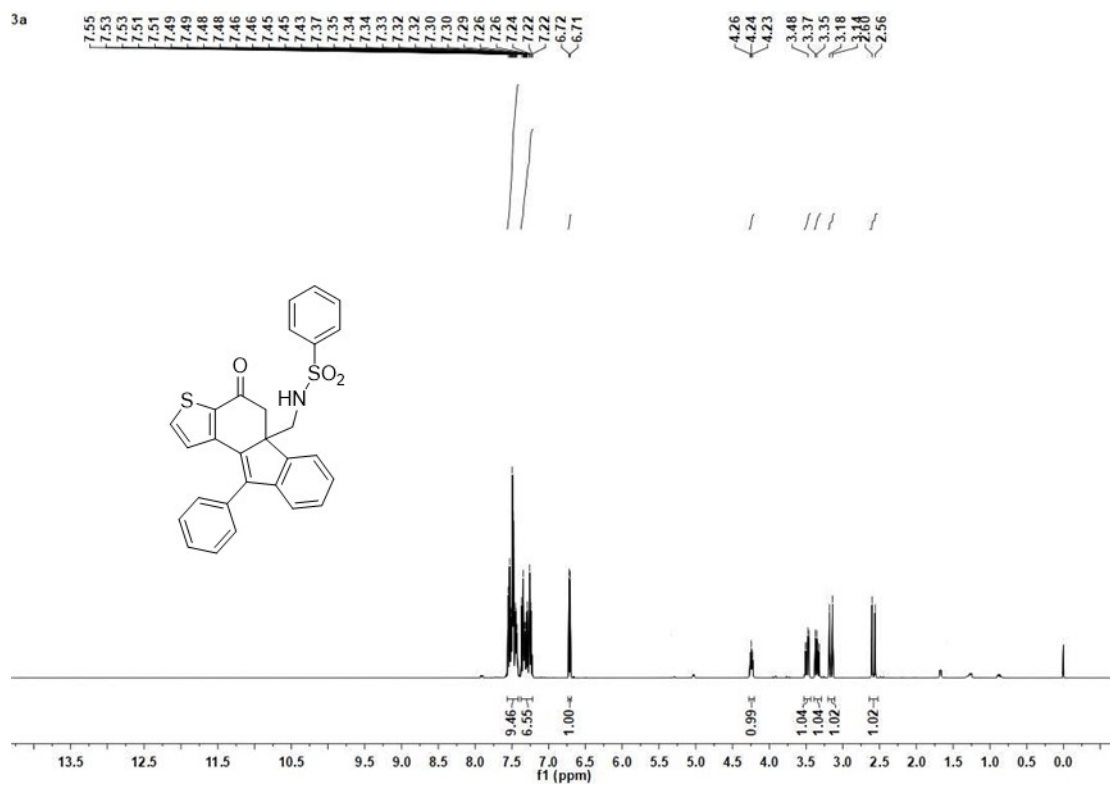

$^{13}\text{C}$  NMR spectrum of 3bq

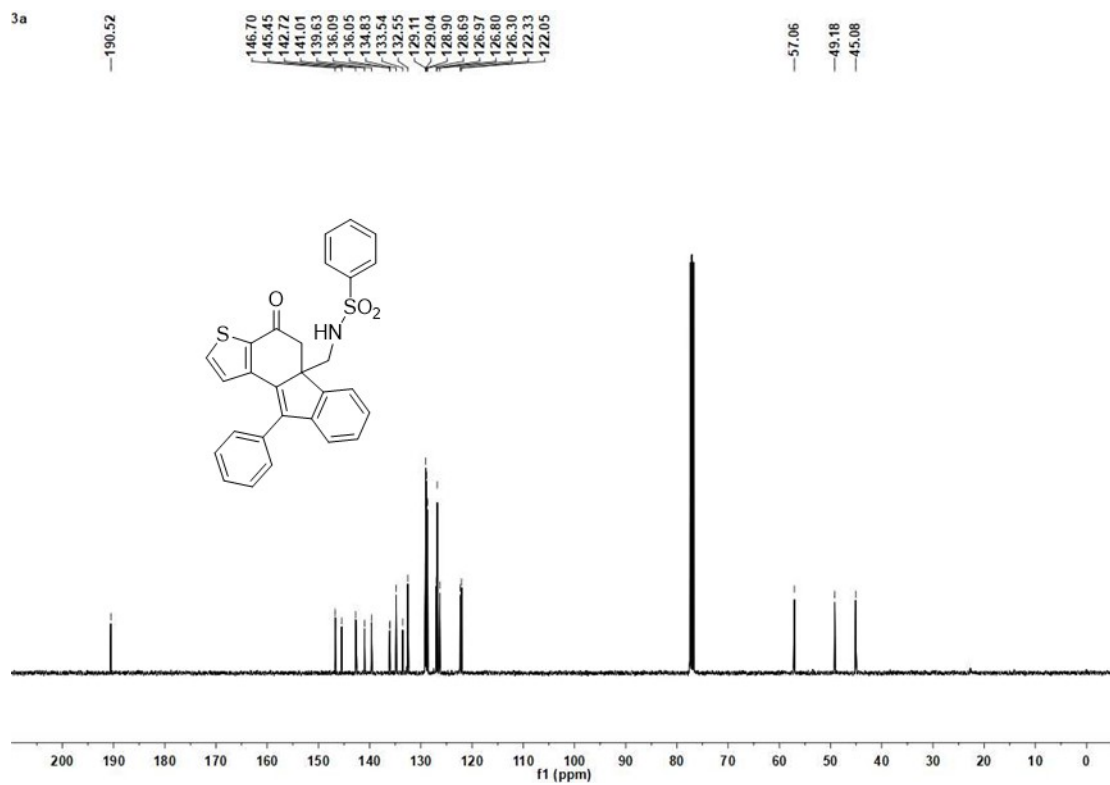

<sup>1</sup>H NMR spectrum of 5a

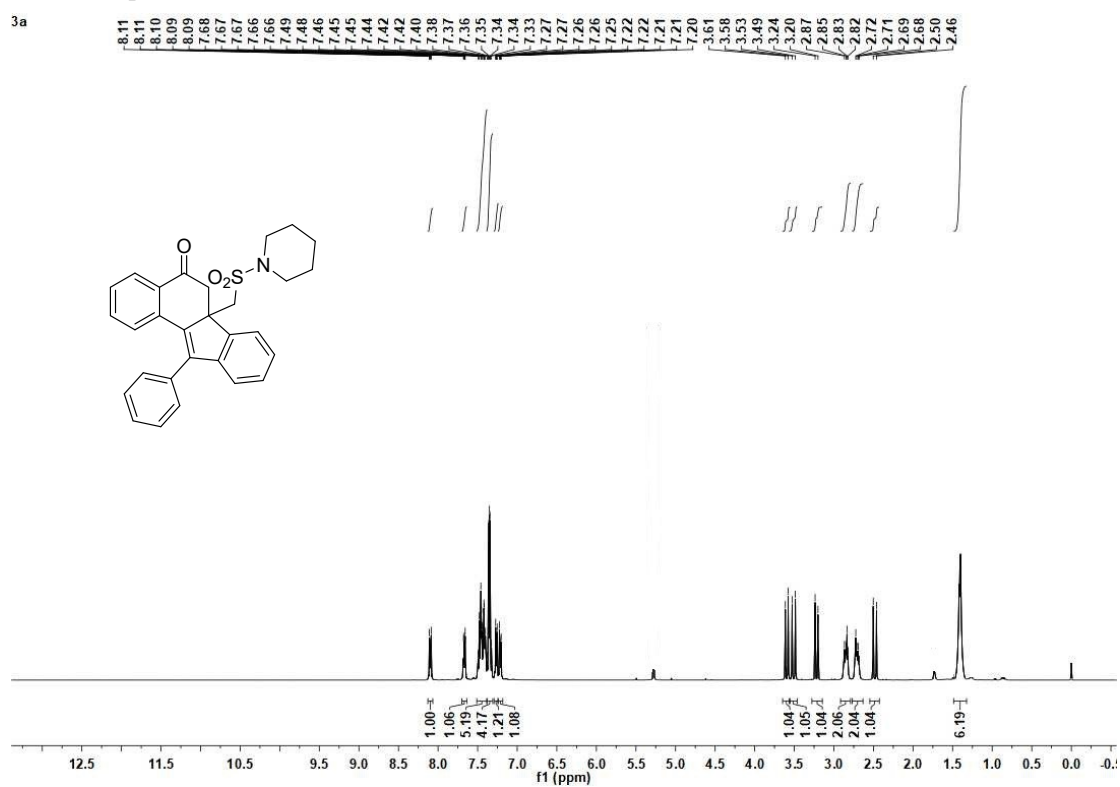

<sup>13</sup>C NMR spectrum of 5a

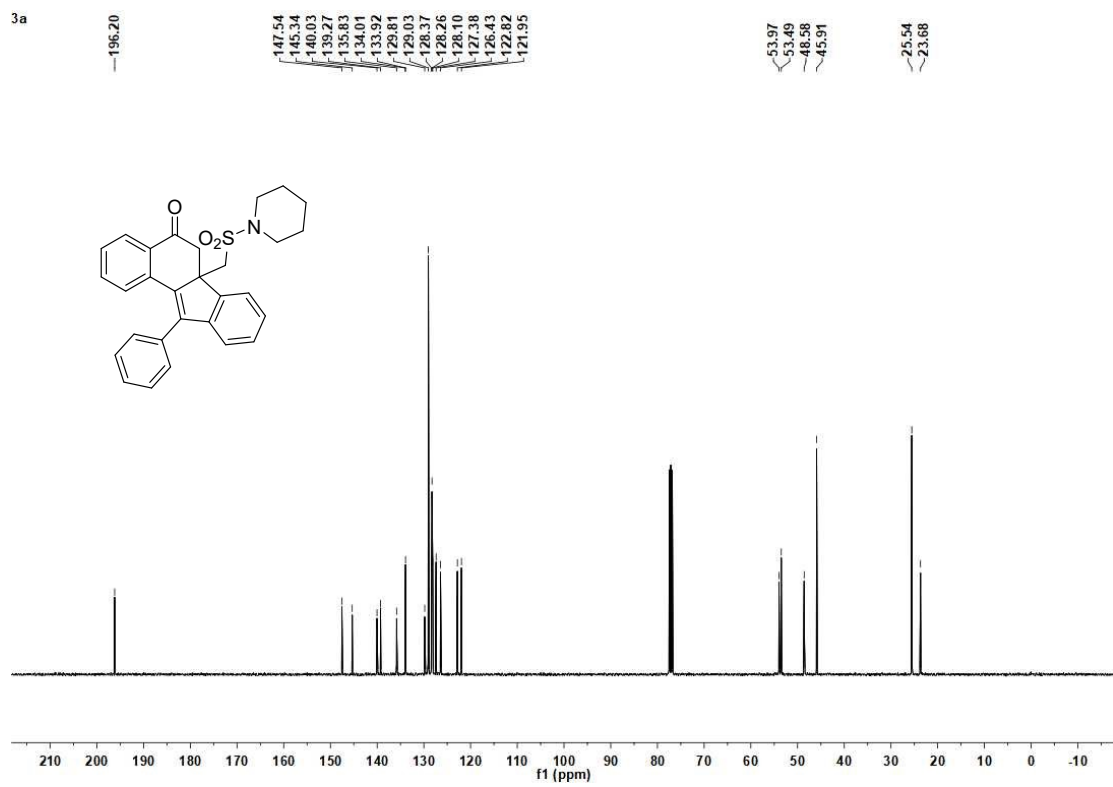

<sup>1</sup>H NMR spectrum of 5b

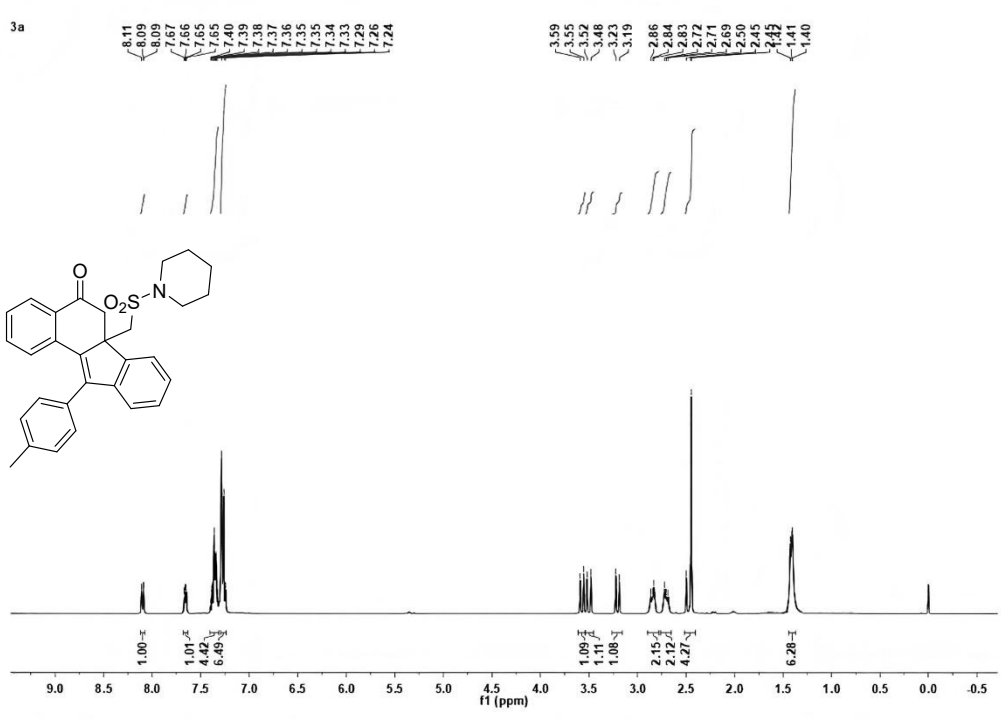

<sup>13</sup>C NMR spectrum of 5b

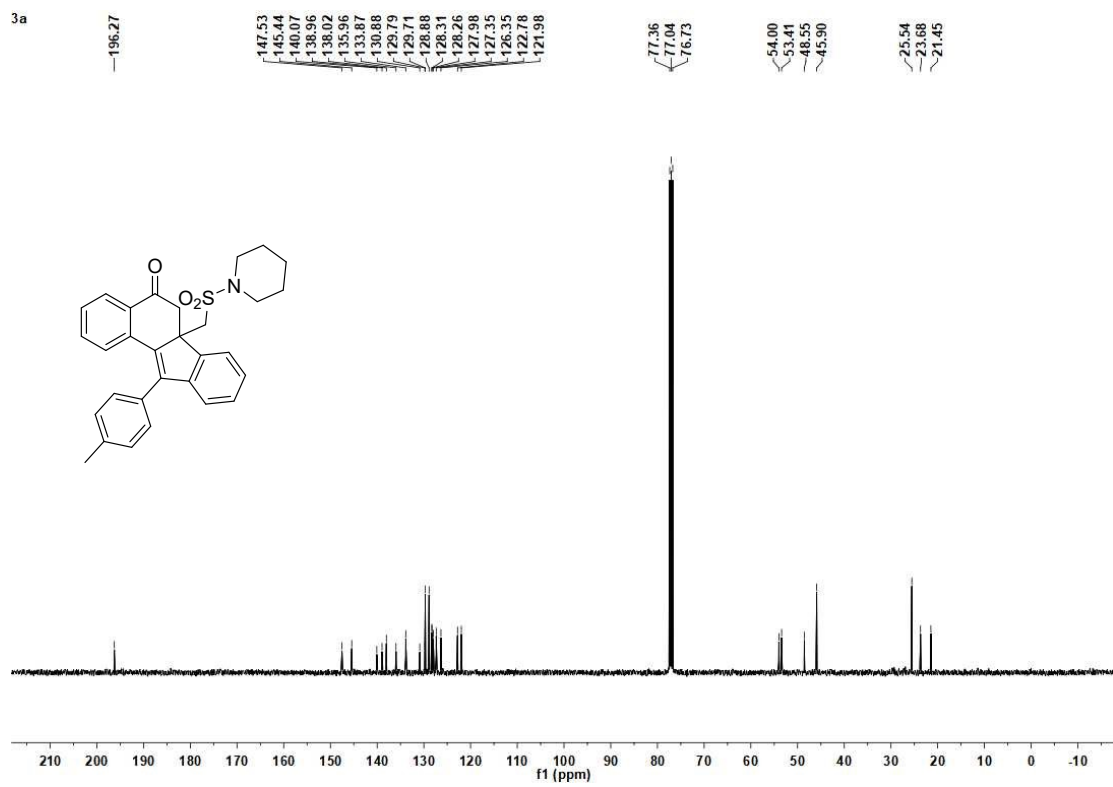

<sup>1</sup>H NMR spectrum of 5c

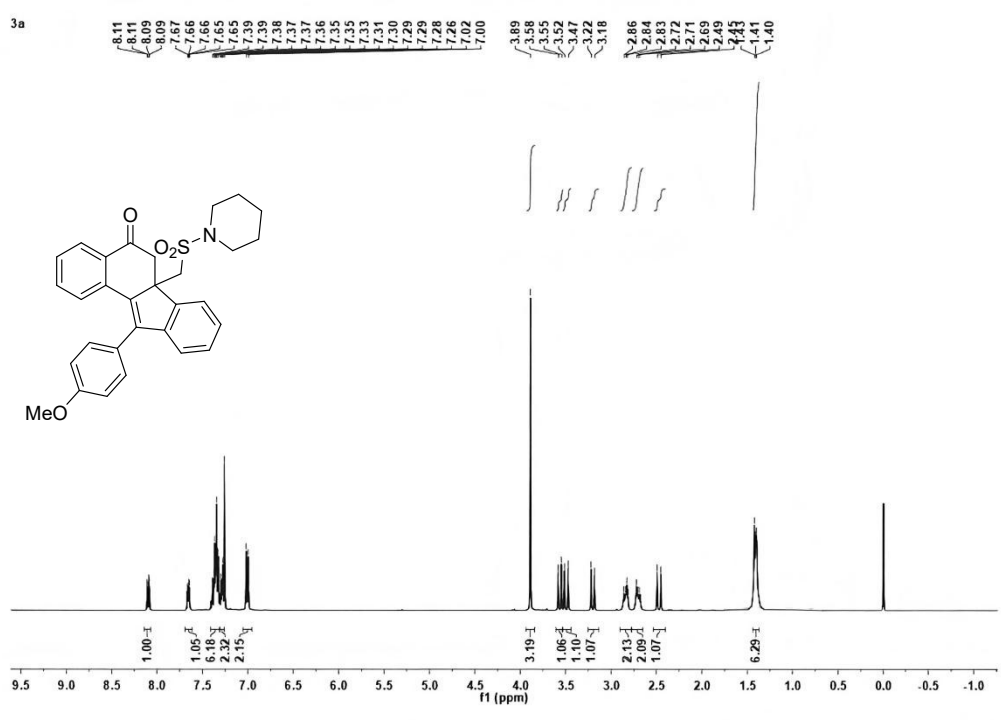

<sup>13</sup>C NMR spectrum of 5c

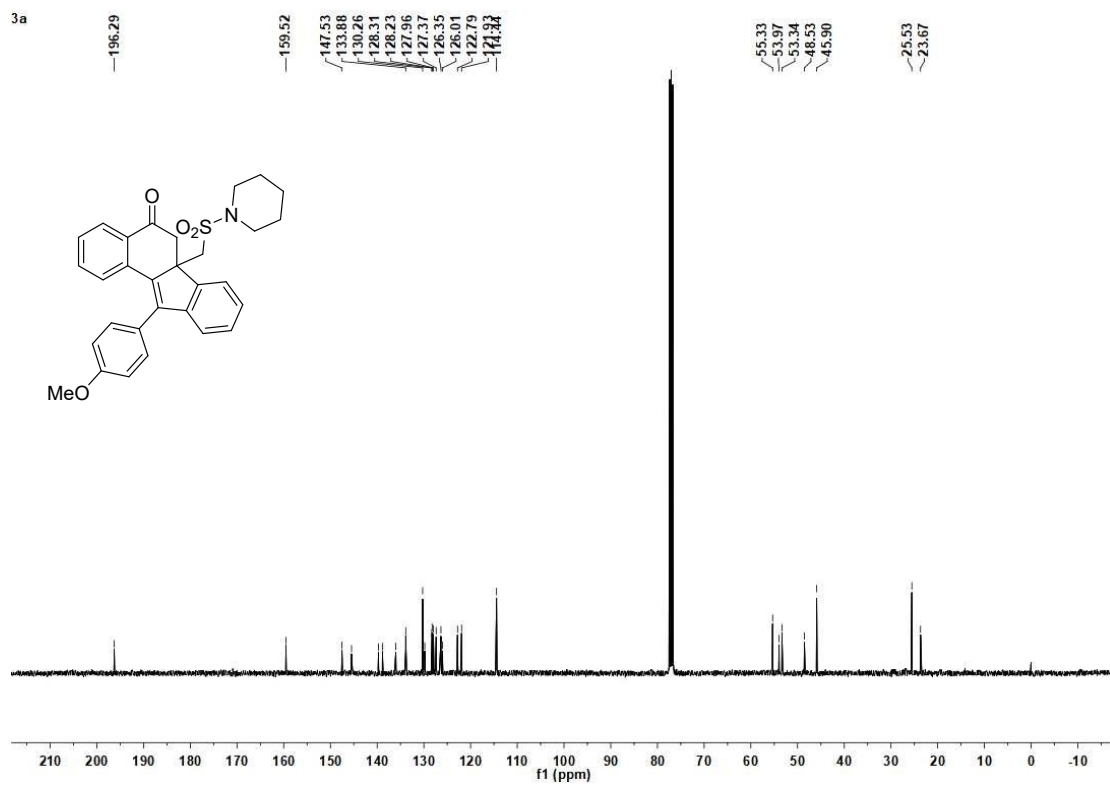

<sup>1</sup>H NMR spectrum of 5d

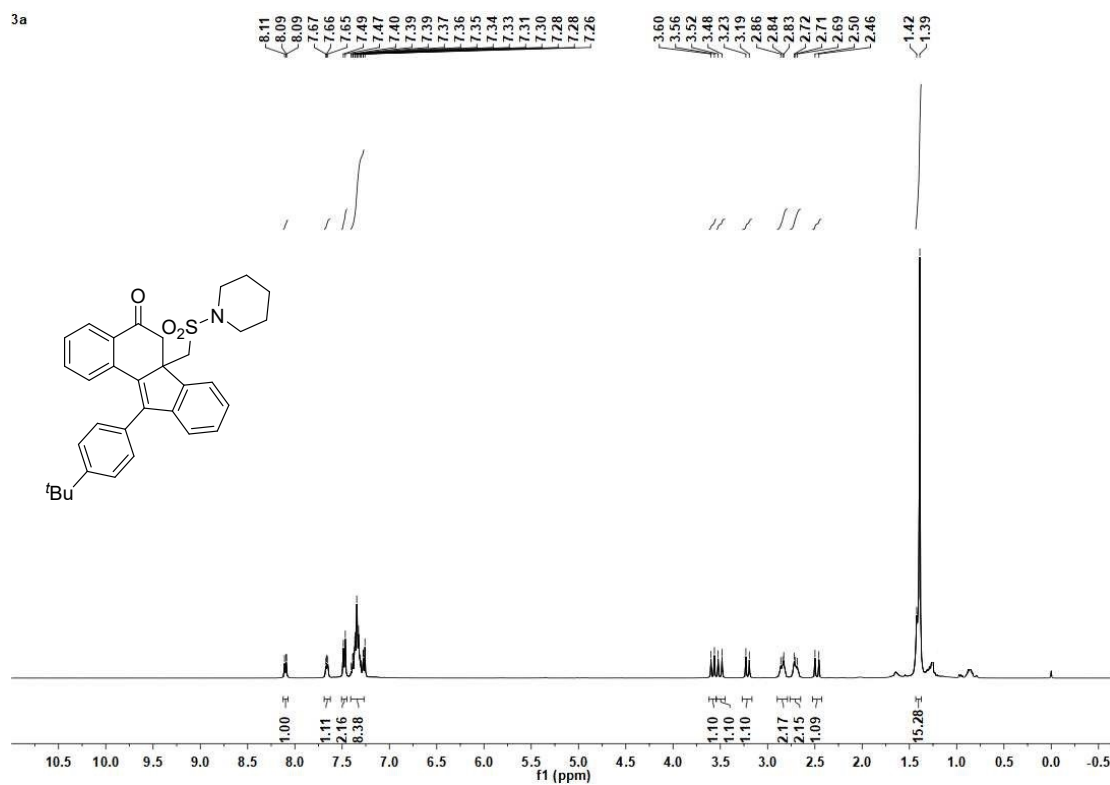

<sup>13</sup>C NMR spectrum of 5d

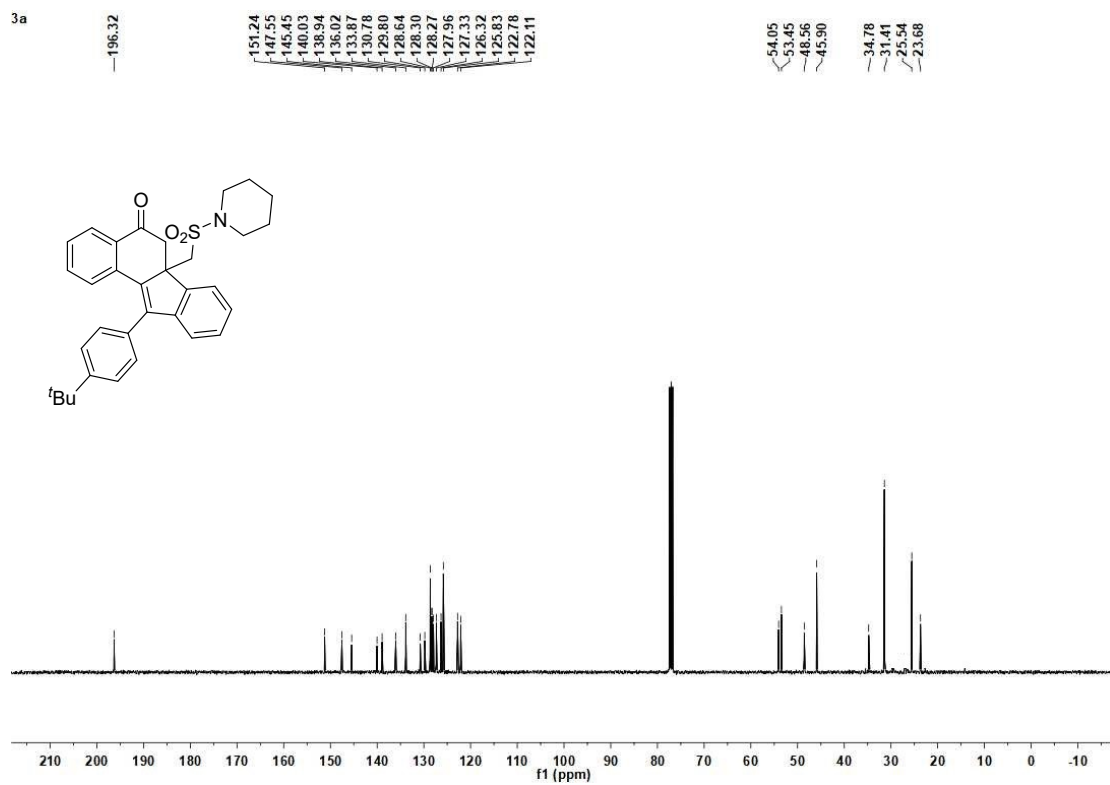

<sup>1</sup>H NMR spectrum of 5e

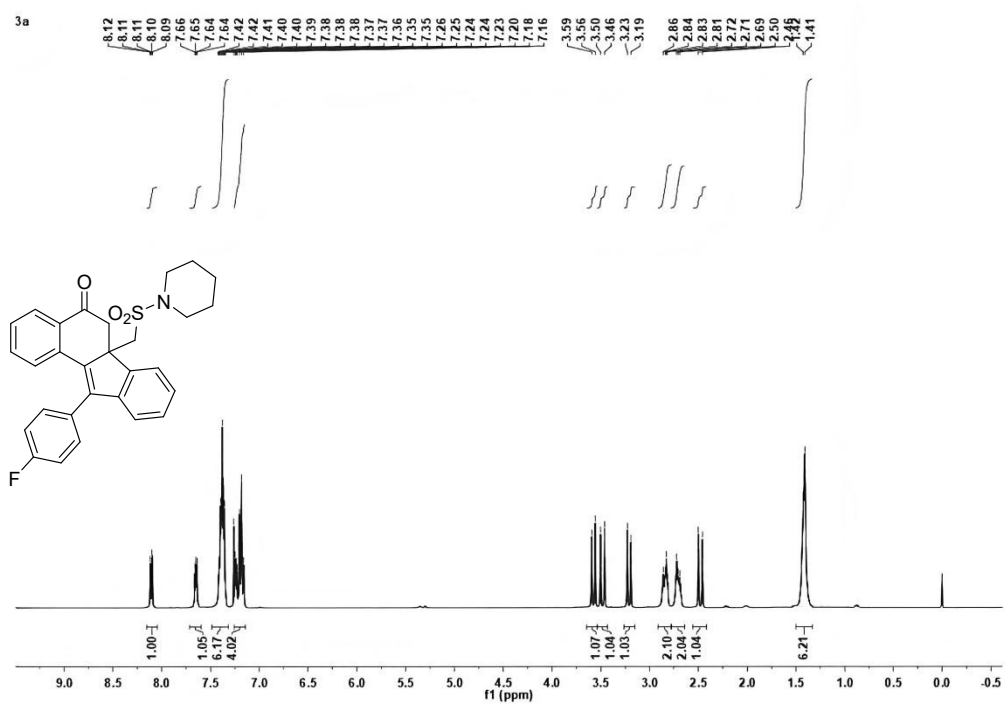

<sup>13</sup>C NMR spectrum of 5e

3a

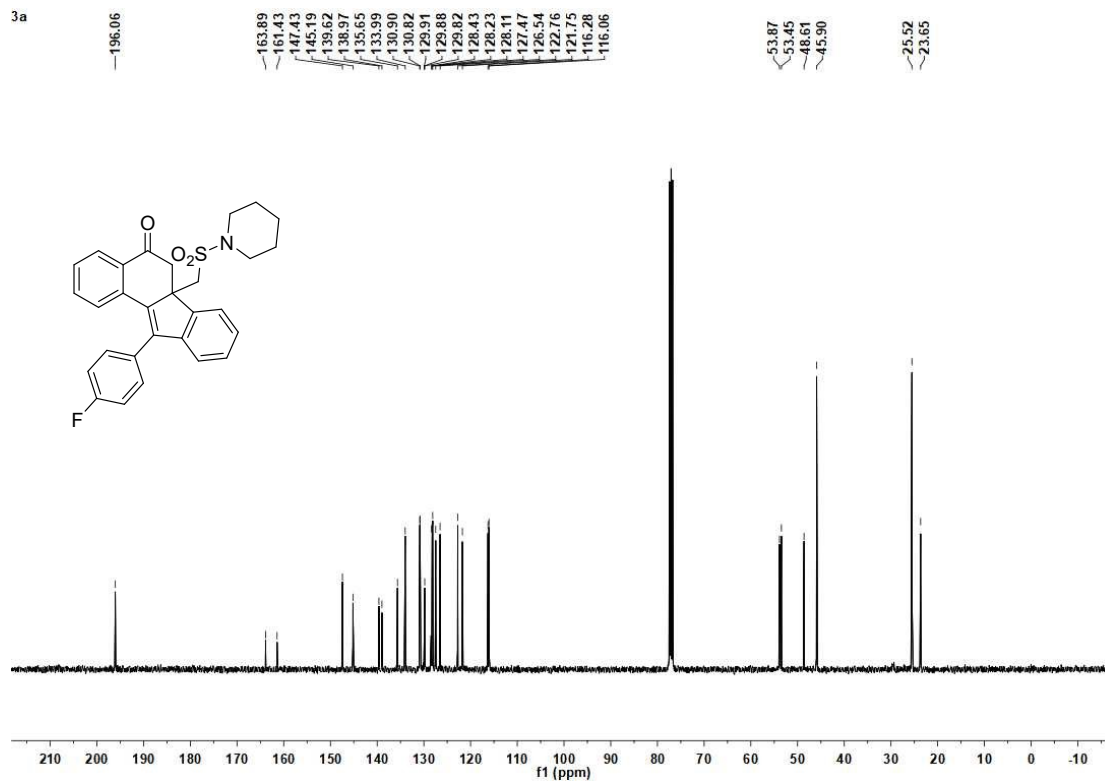

<sup>19</sup>F NMR spectrum of 5e

3a

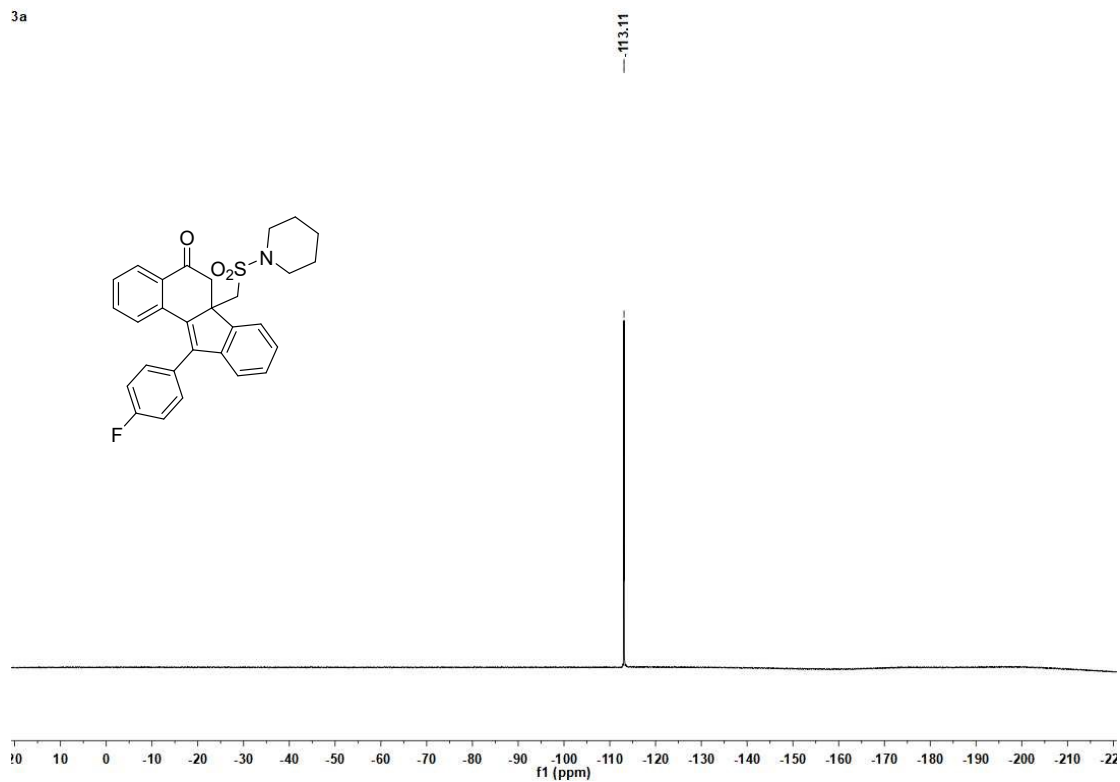

<sup>1</sup>H NMR spectrum of 5f

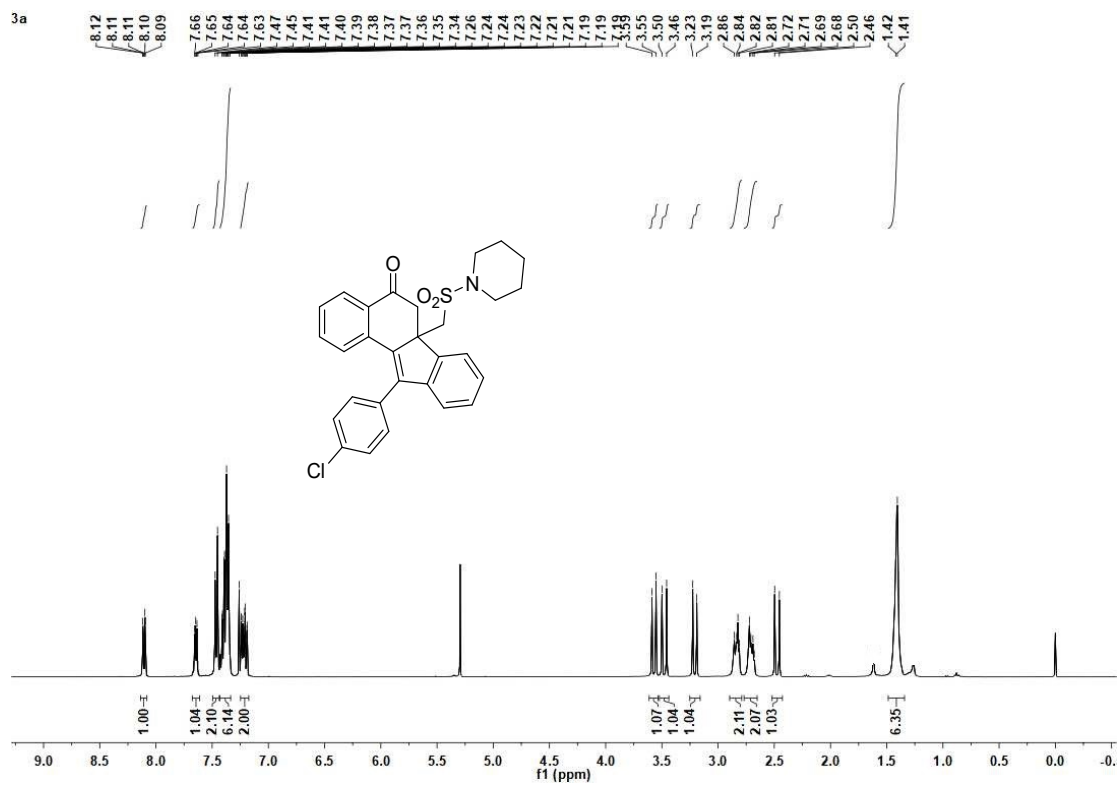

<sup>13</sup>C NMR spectrum of 5f

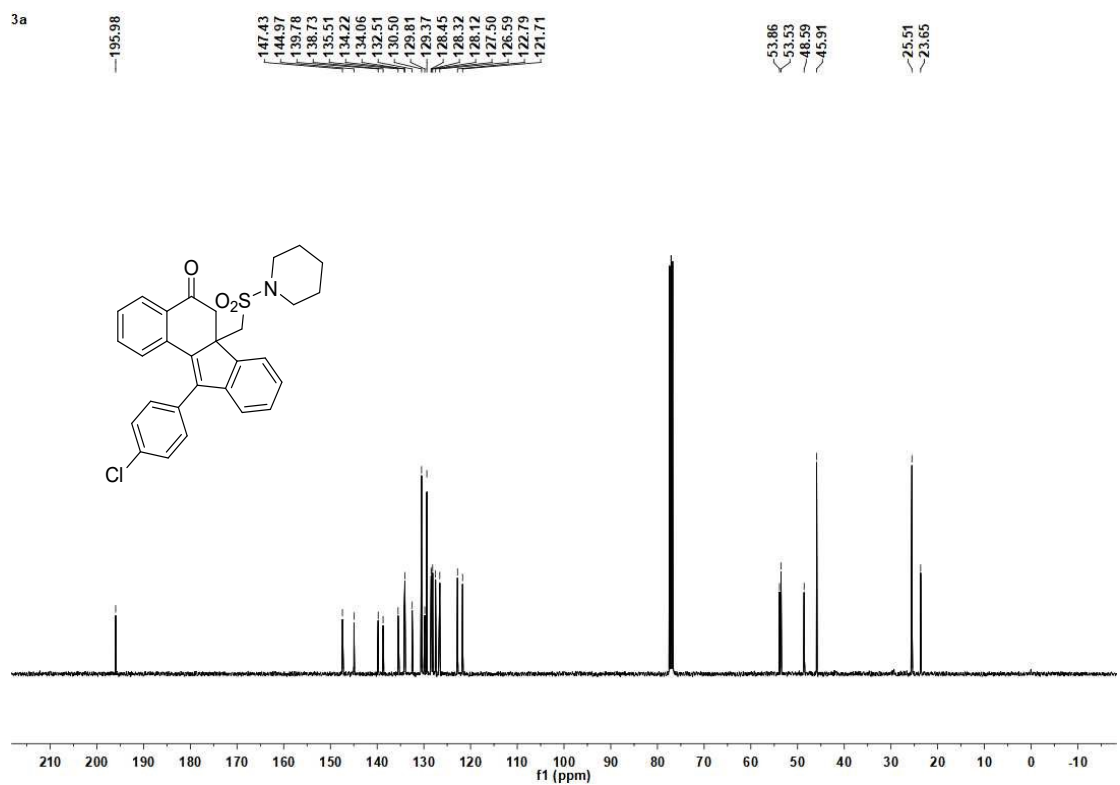

<sup>1</sup>H NMR spectrum of 5g

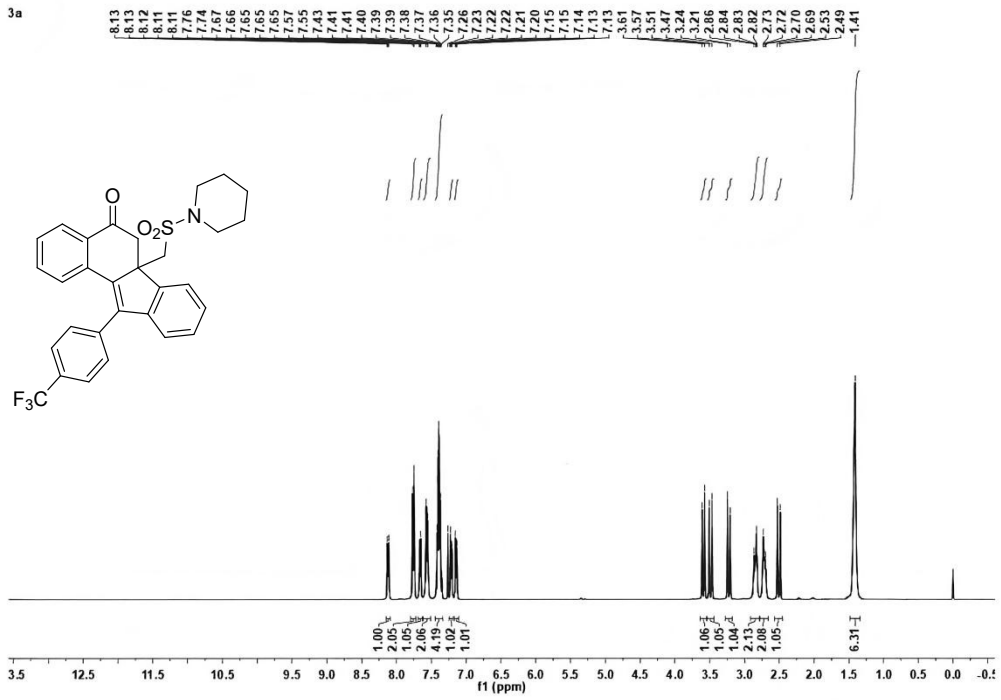

<sup>13</sup>C NMR spectrum of 5g

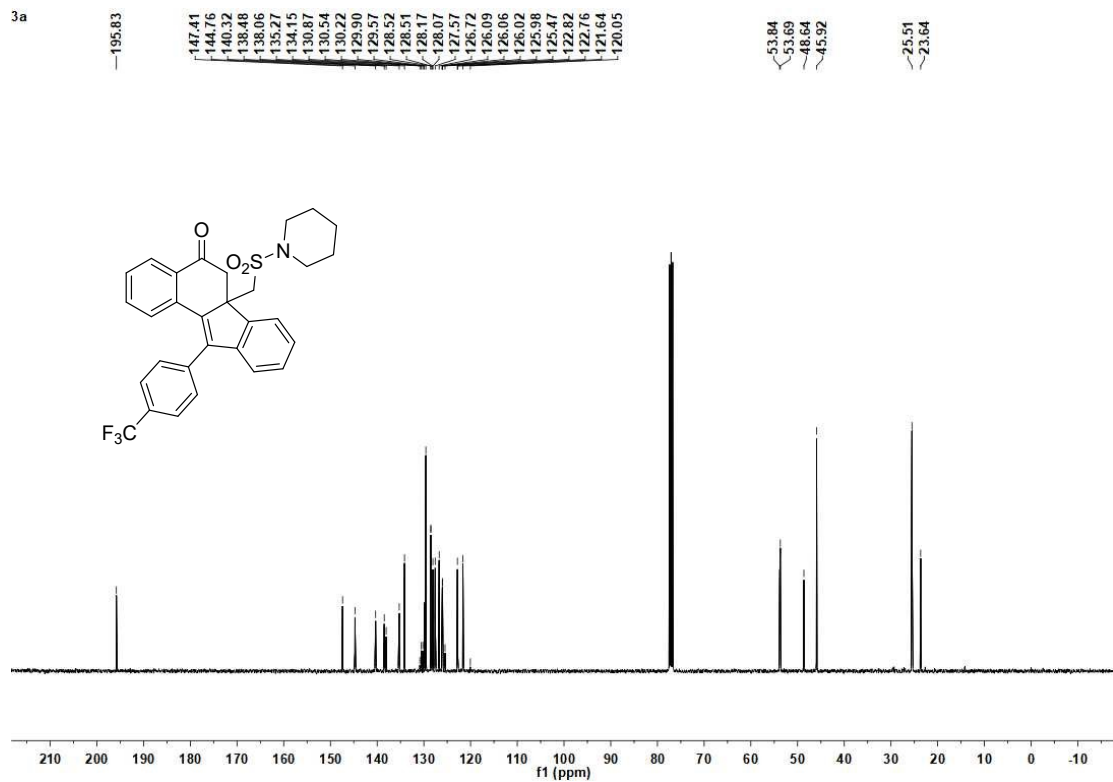

<sup>19</sup>F NMR spectrum of 5g

3a

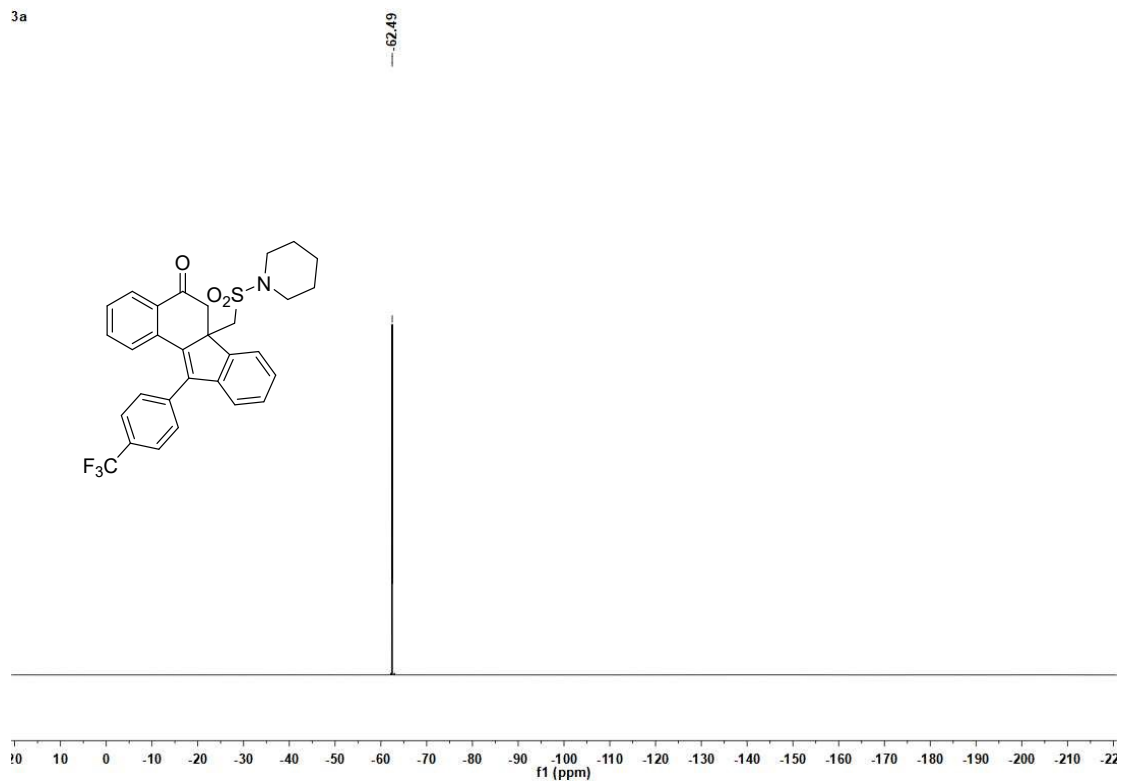

<sup>1</sup>H NMR spectrum of 5h

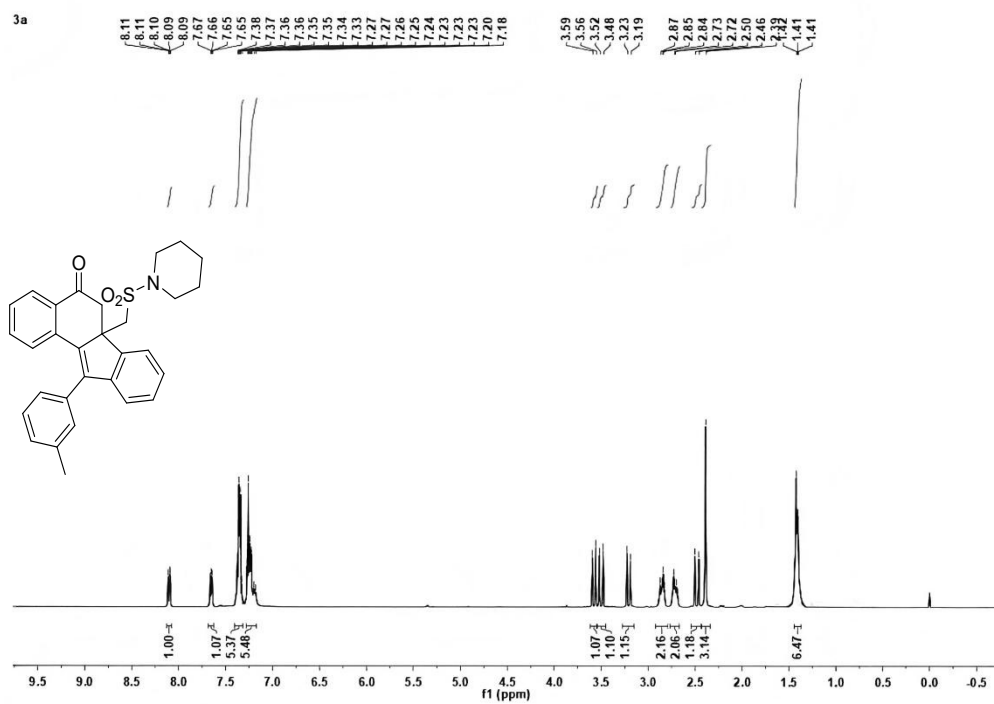

<sup>13</sup>C NMR spectrum of 5h

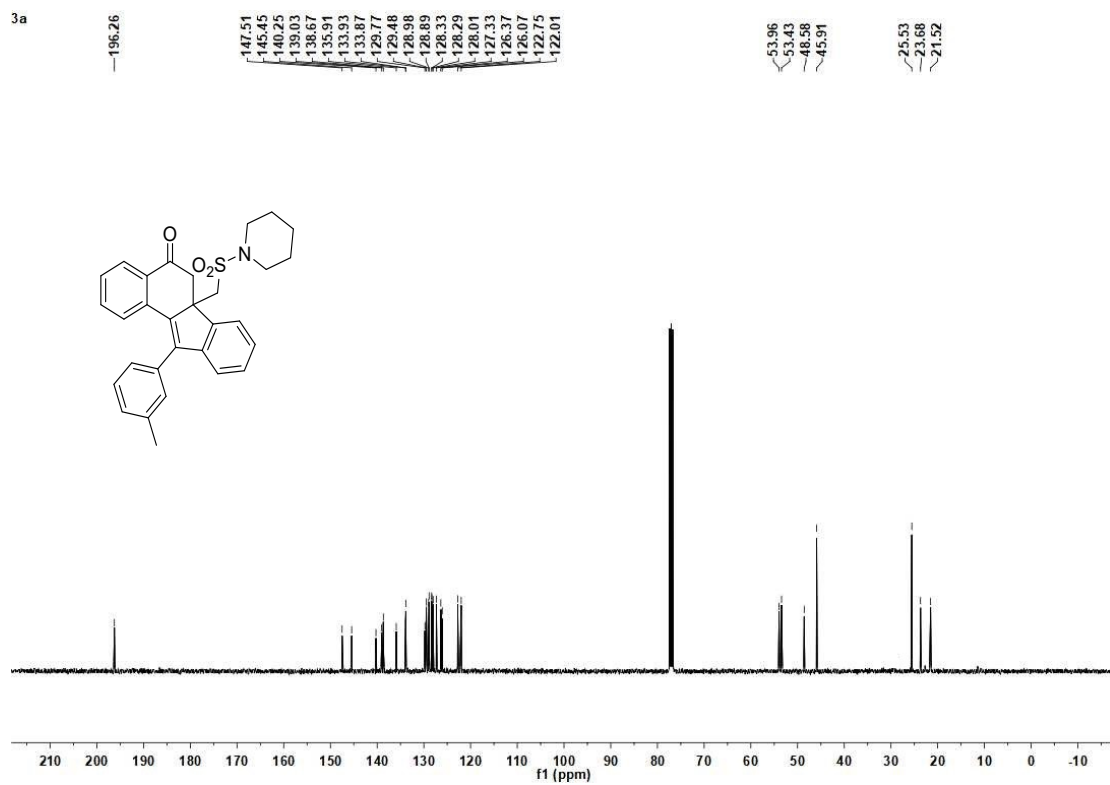

$^1\text{H}$  NMR spectrum of **5i**

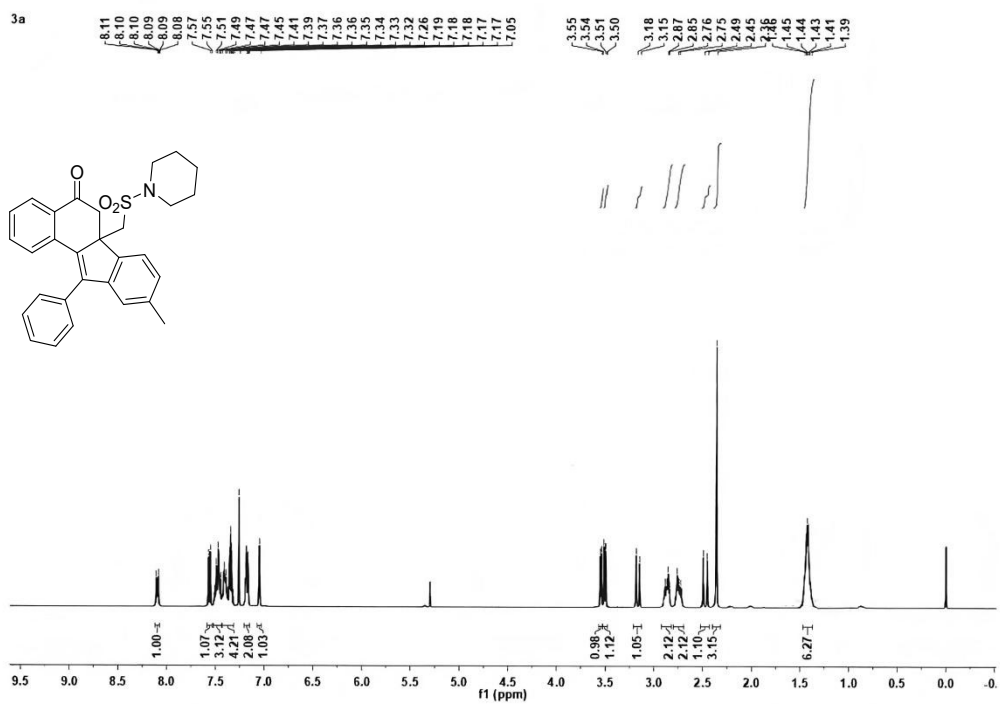

$^{13}\text{C}$  NMR spectrum of **5i**

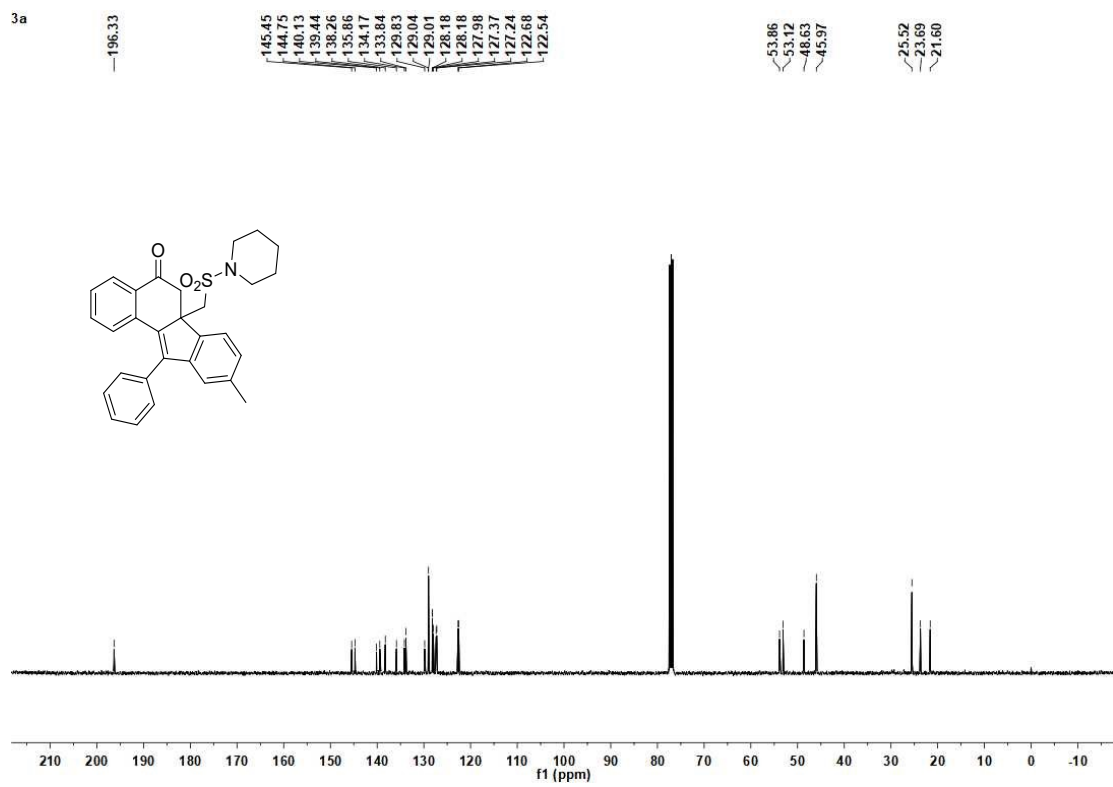

<sup>1</sup>H NMR spectrum of 5j

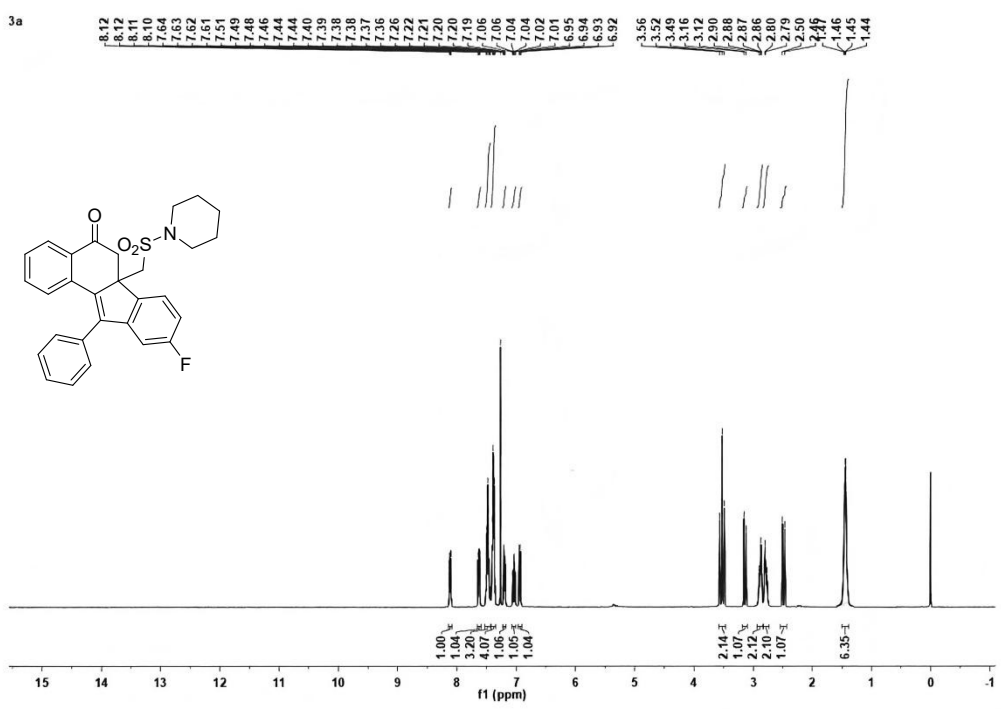

<sup>13</sup>C NMR spectrum of 5j

3a

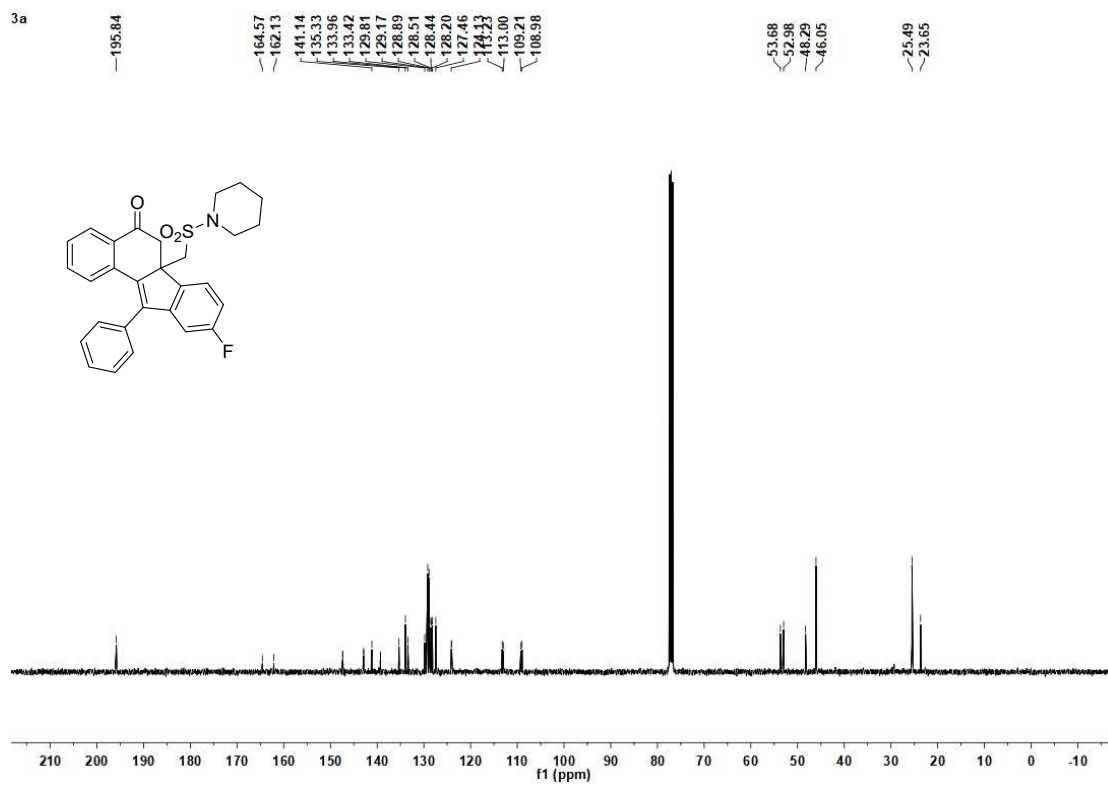

<sup>19</sup>F NMR spectrum of 5j

3a

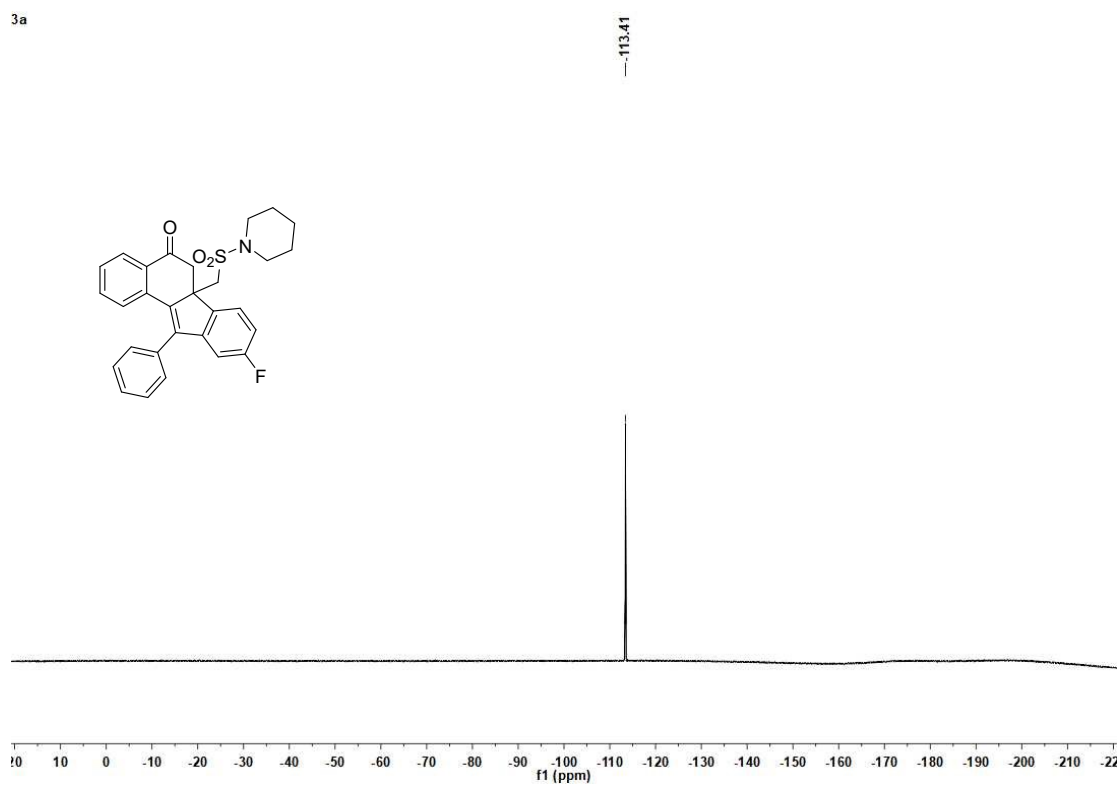

<sup>1</sup>H NMR spectrum of 5k

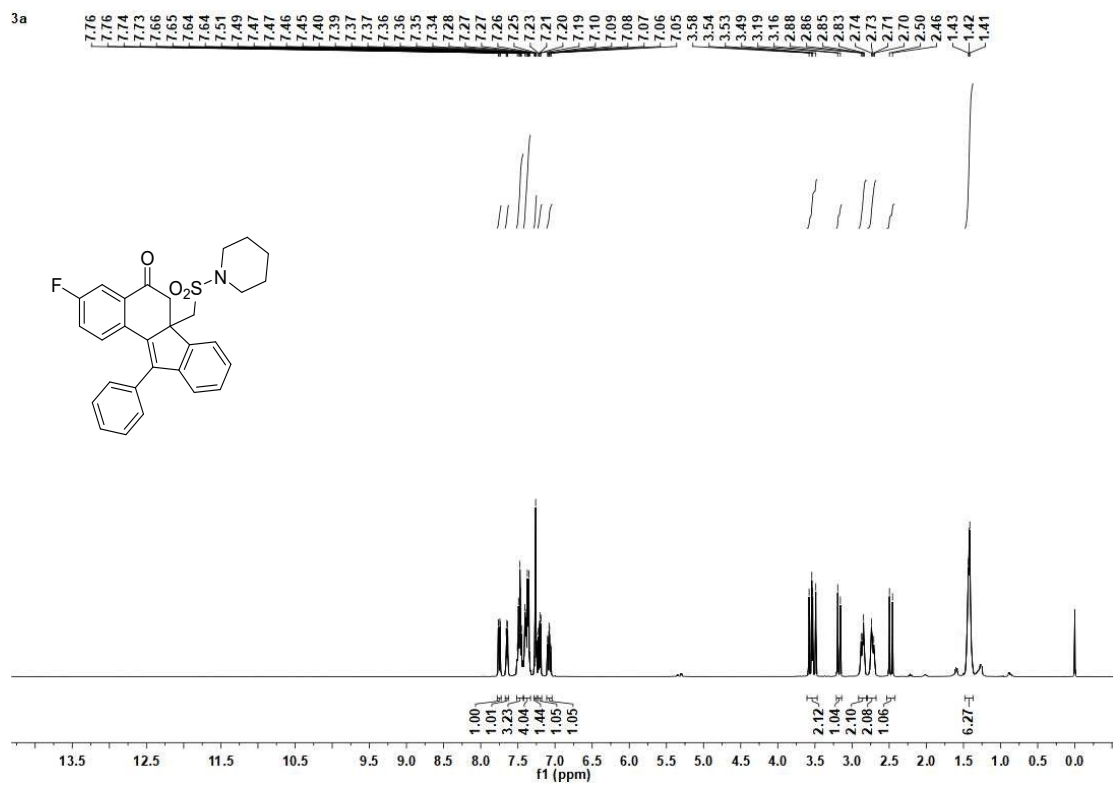

<sup>13</sup>C NMR spectrum of 5k

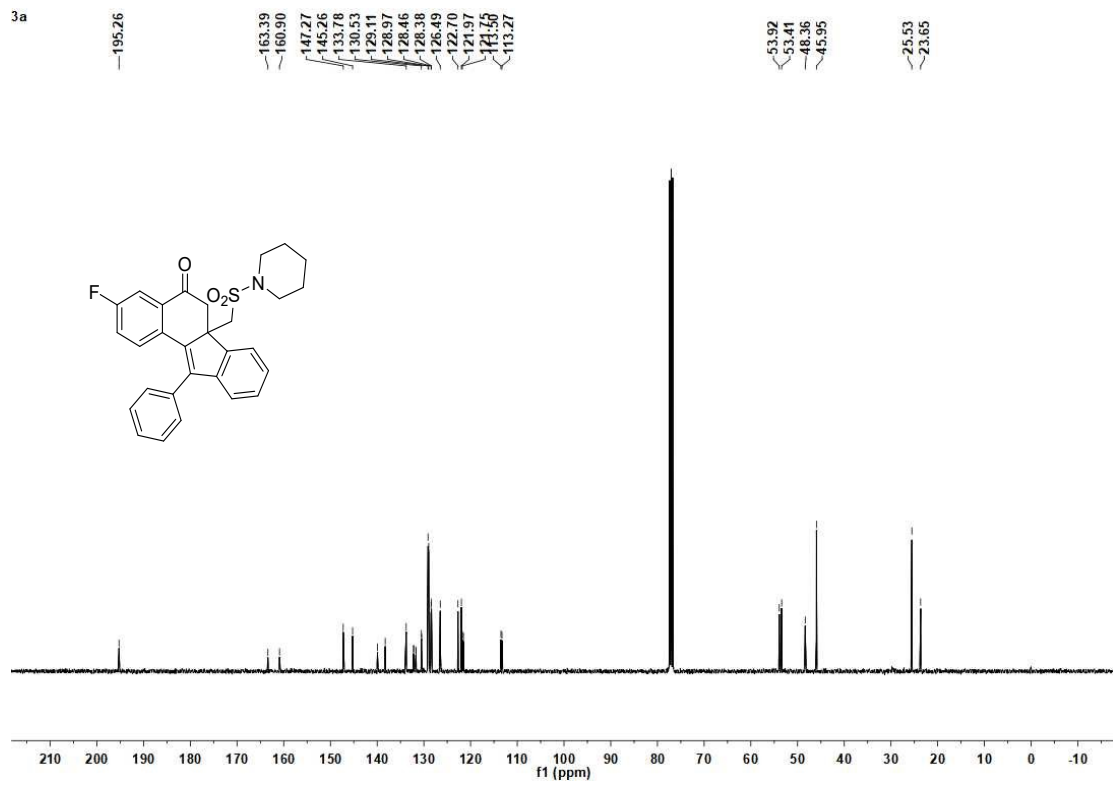

<sup>19</sup>F NMR spectrum of 5k

3a

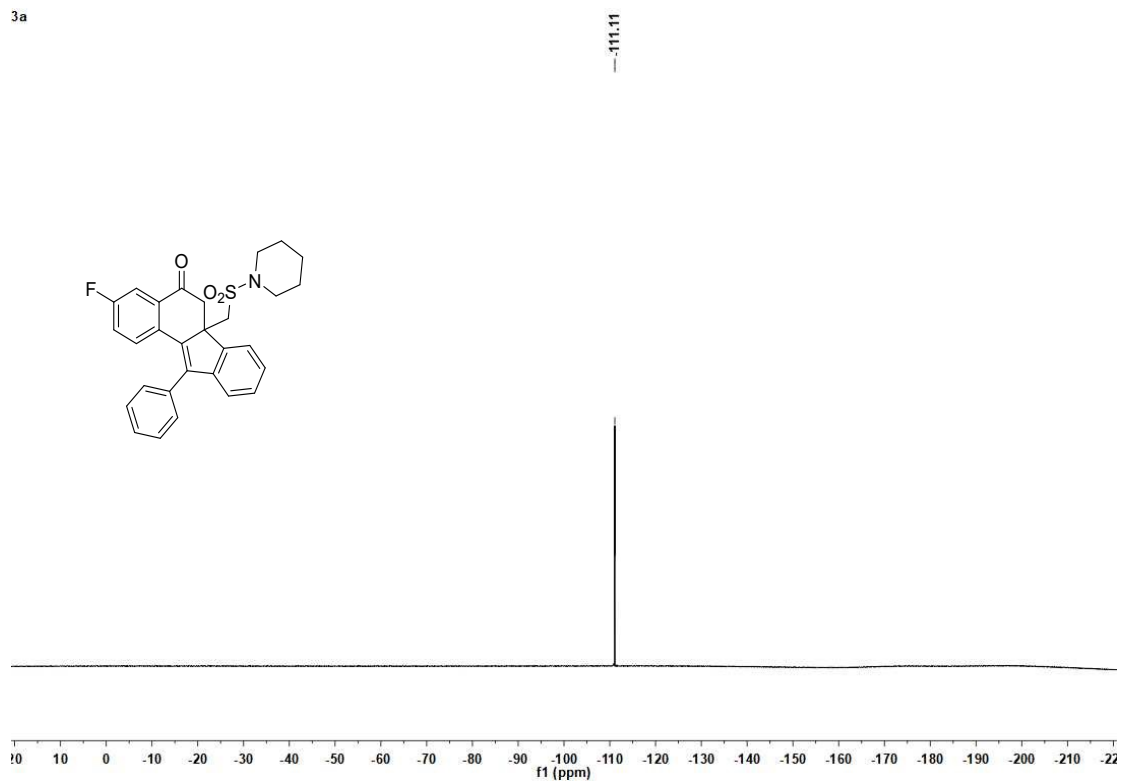<sup>1</sup>H NMR spectrum of 5I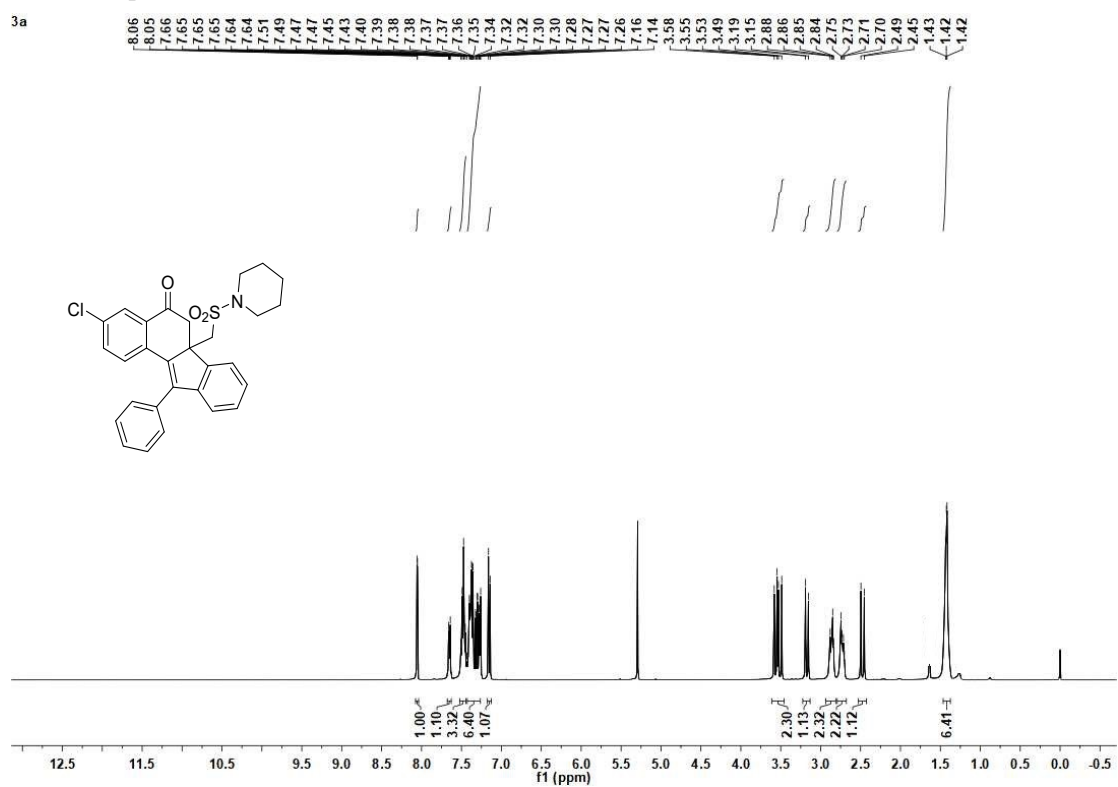<sup>13</sup>C NMR spectrum of 5I

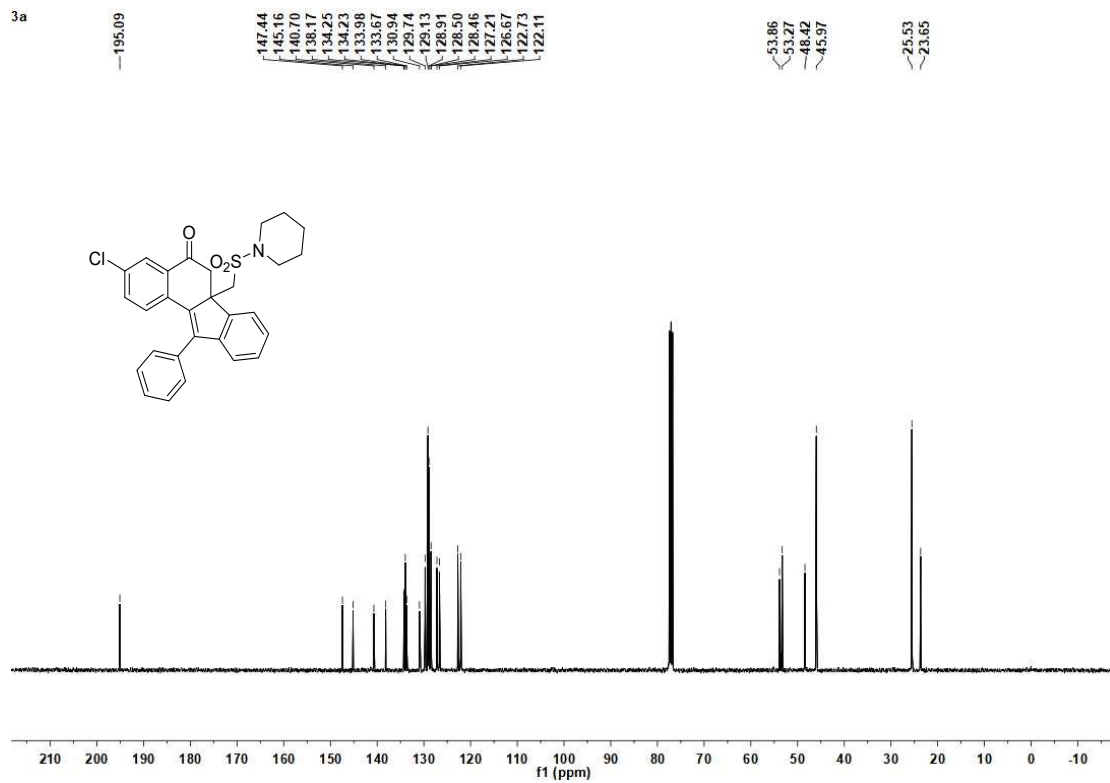

<sup>1</sup>H NMR spectrum of 5m

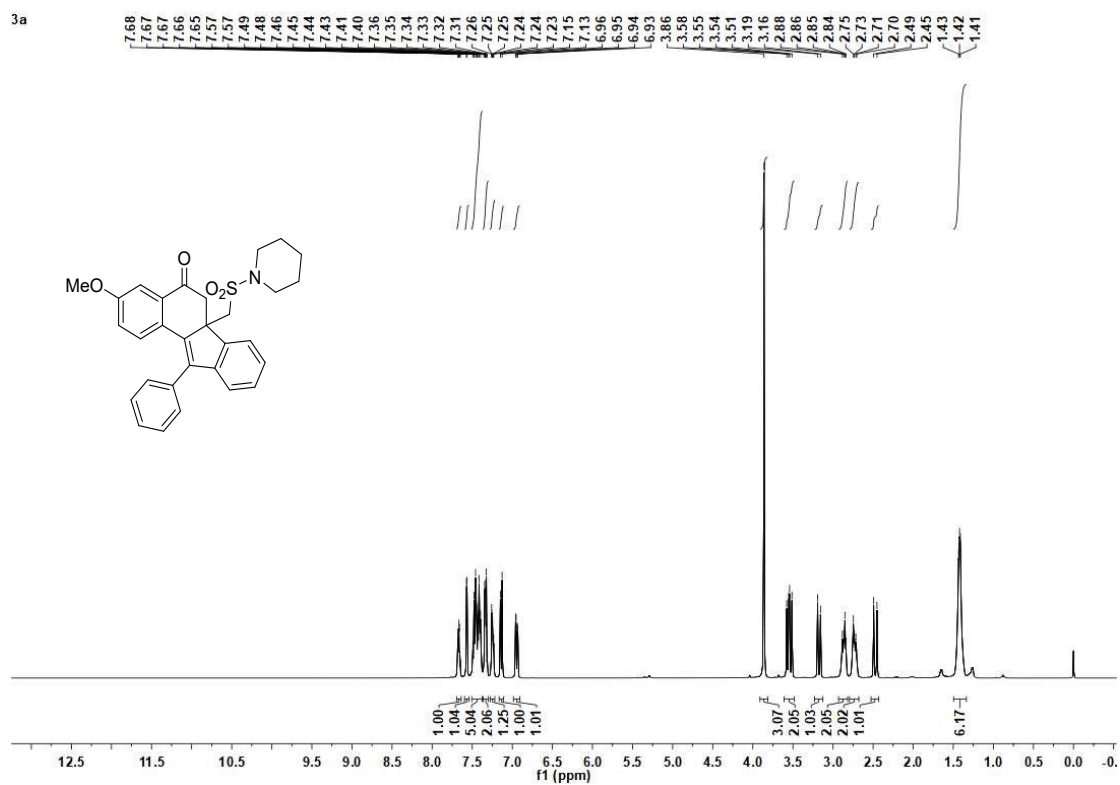

<sup>13</sup>C NMR spectrum of 5m

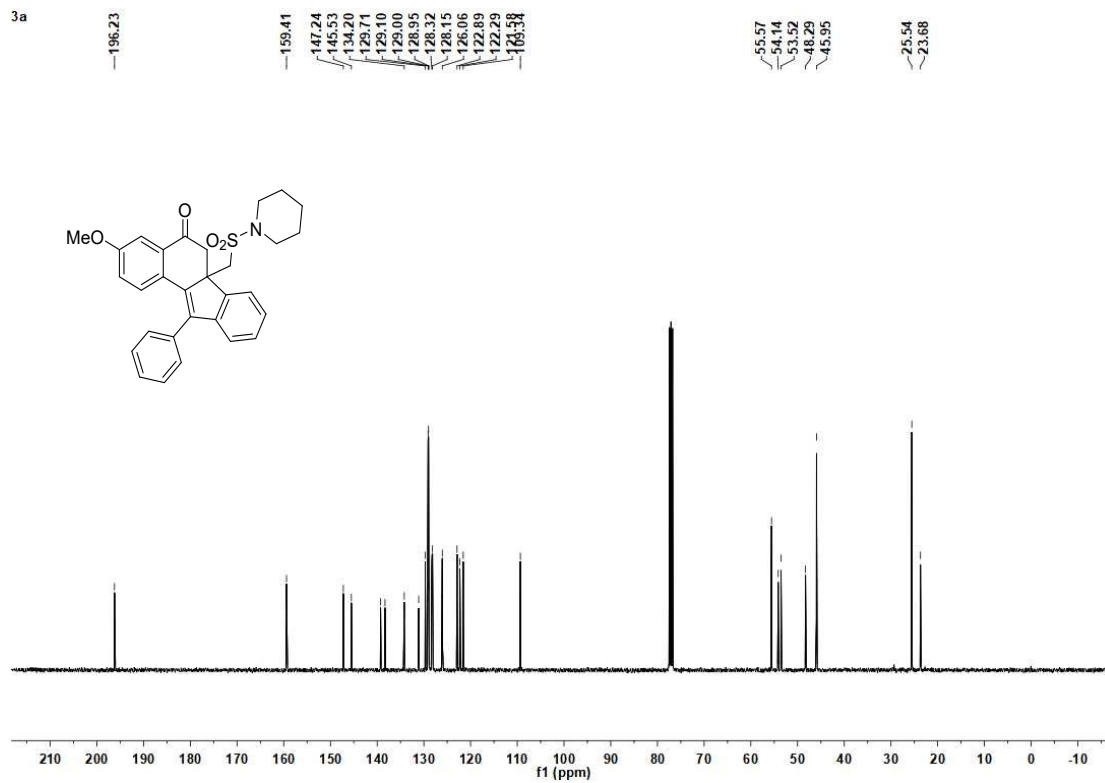

<sup>1</sup>H NMR spectrum of 5n

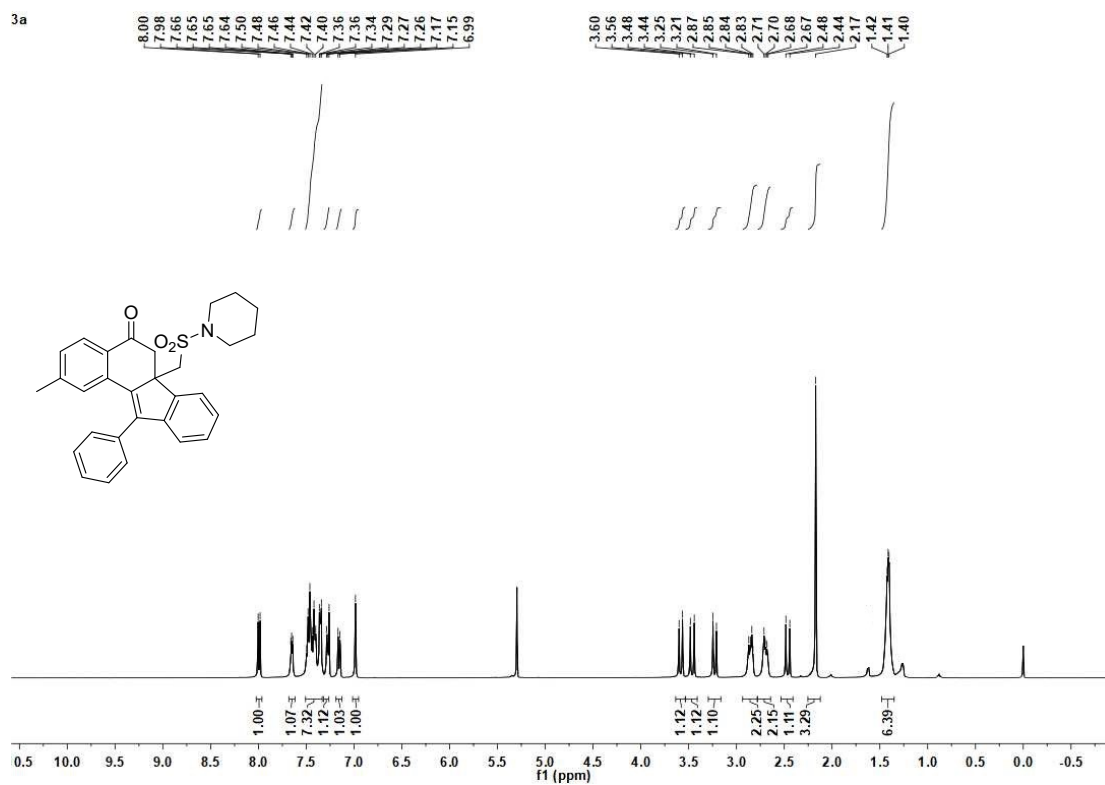

<sup>13</sup>C NMR spectrum of 5n



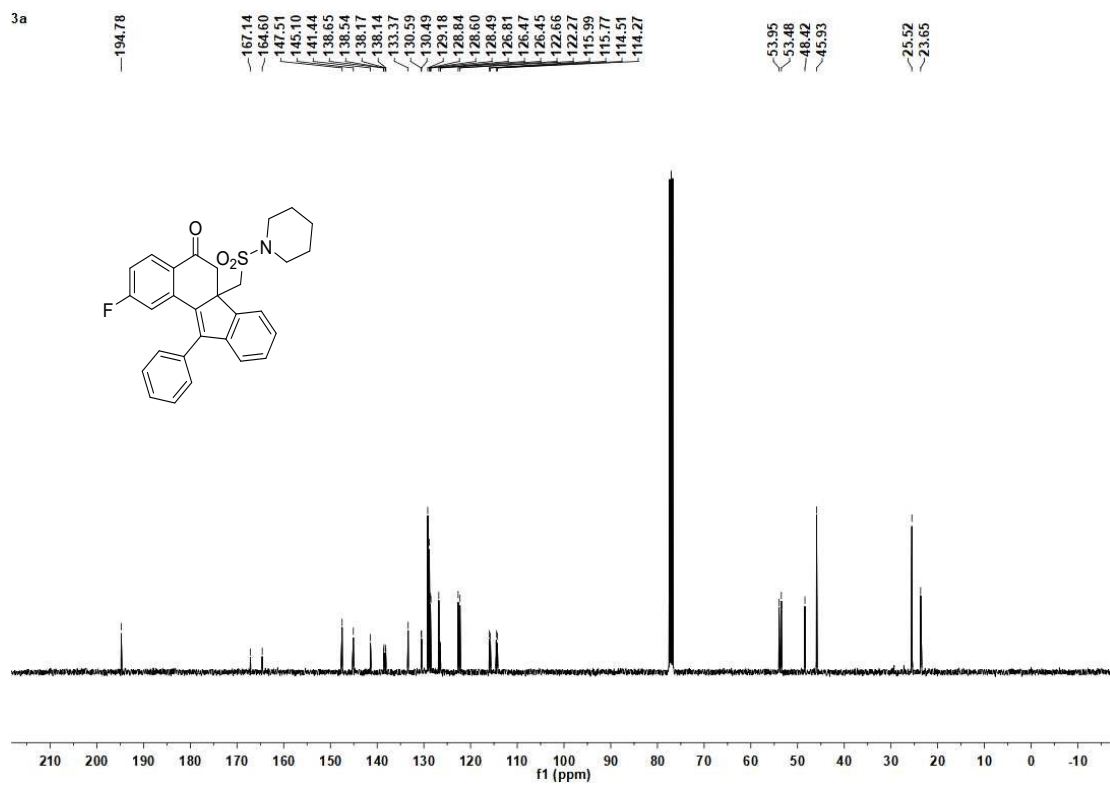

$^{19}\text{F}$  NMR spectrum of **5o**

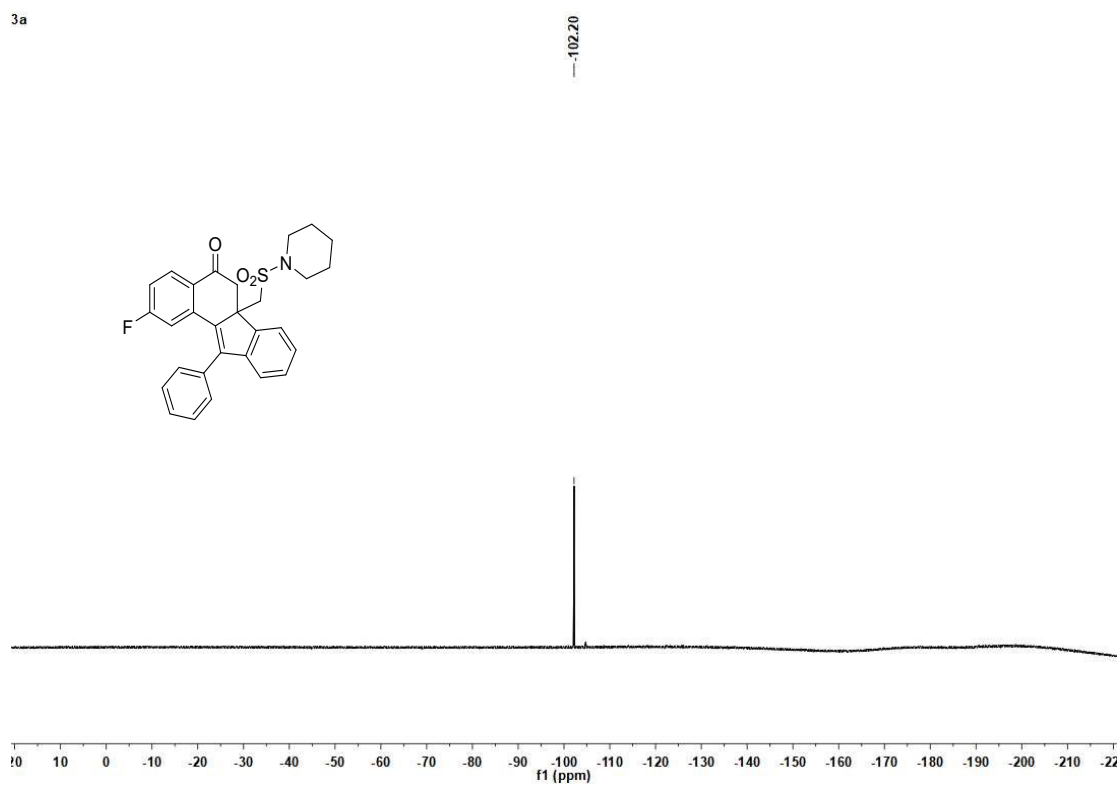

$^1\text{H}$  NMR spectrum of **5p**

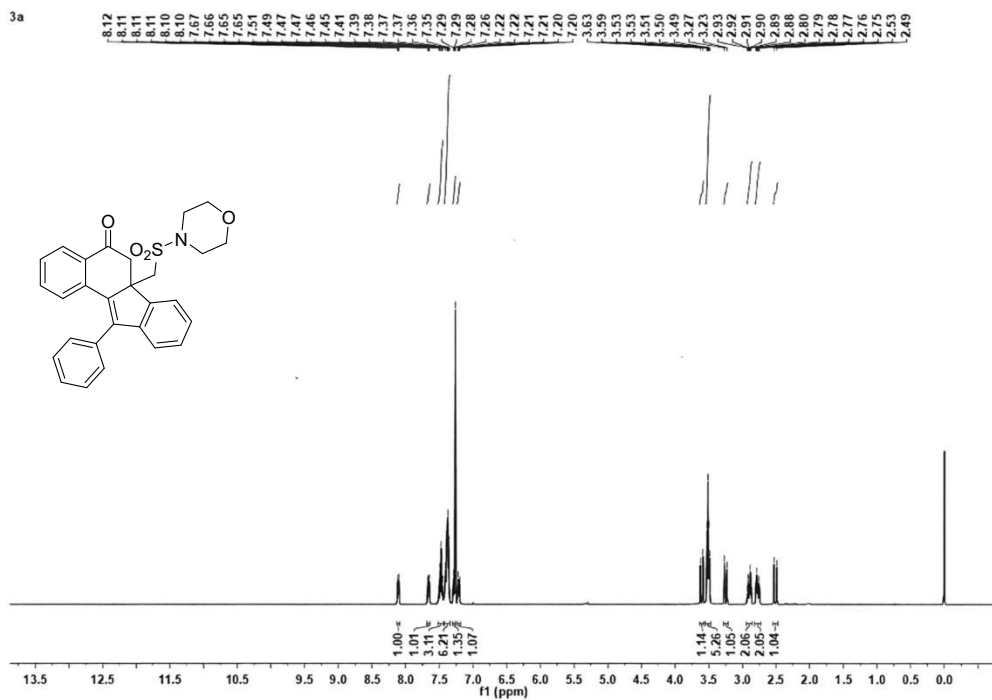

<sup>13</sup>C NMR spectrum of 5p

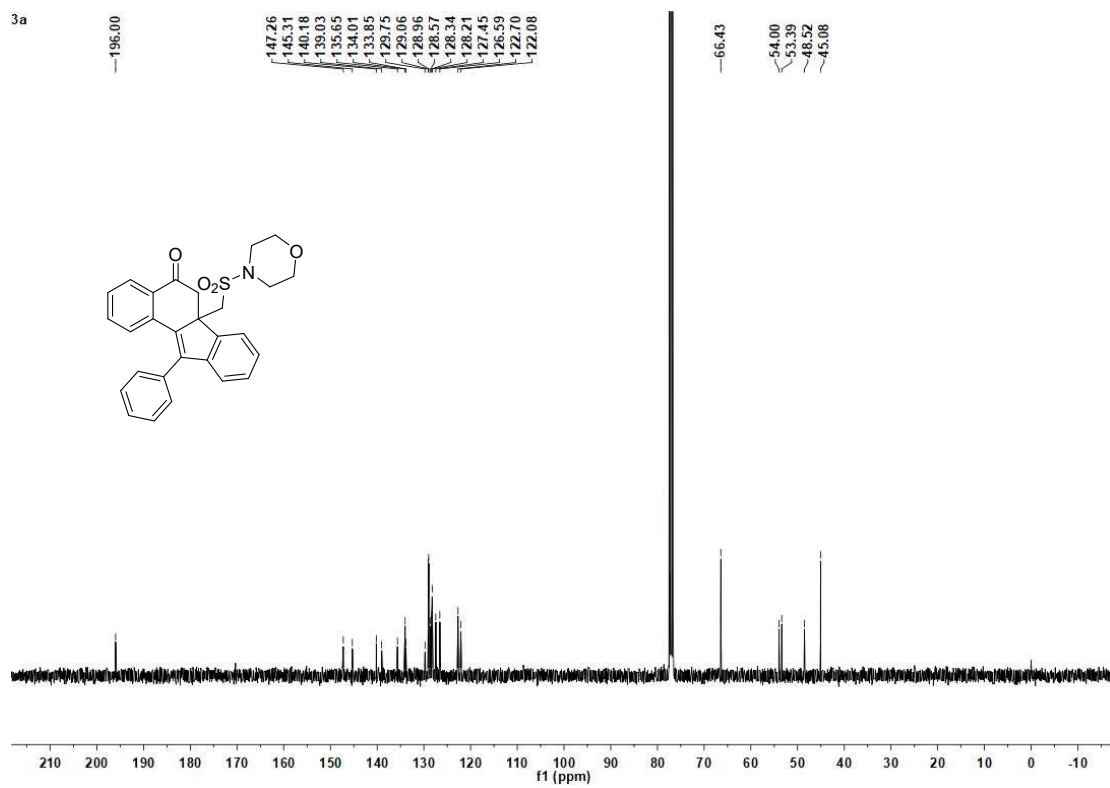

<sup>1</sup>H NMR spectrum of 5q

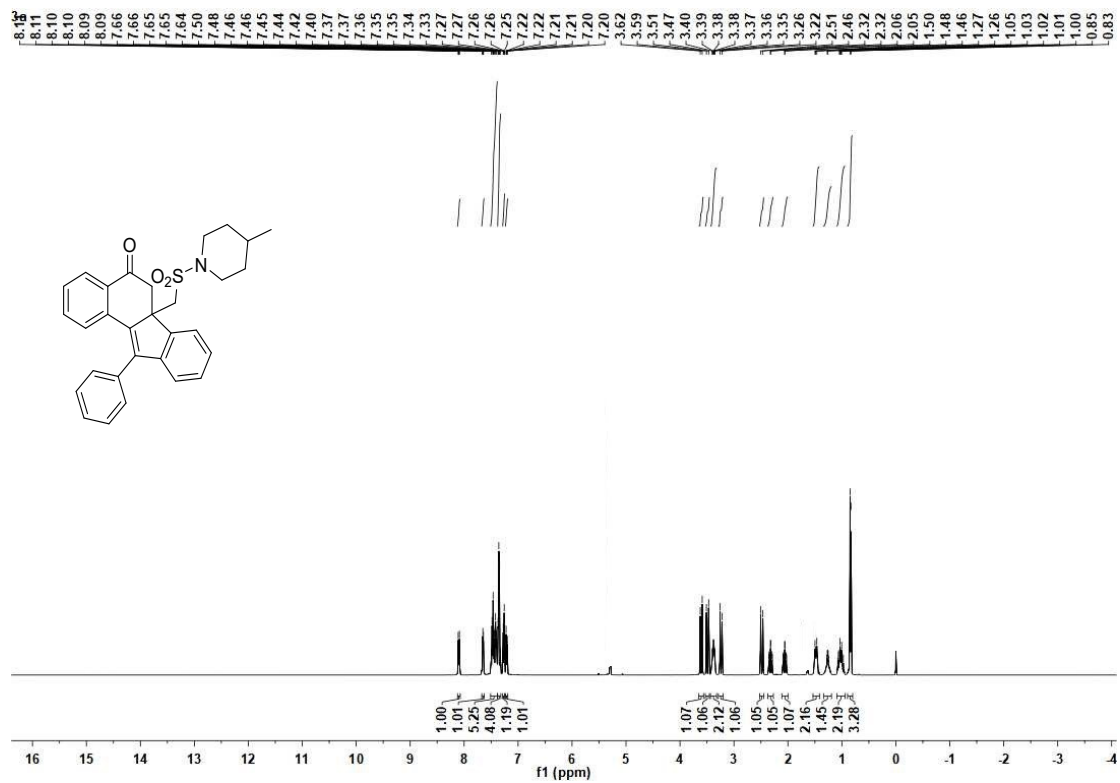

**<sup>13</sup>C NMR spectrum of 5q**

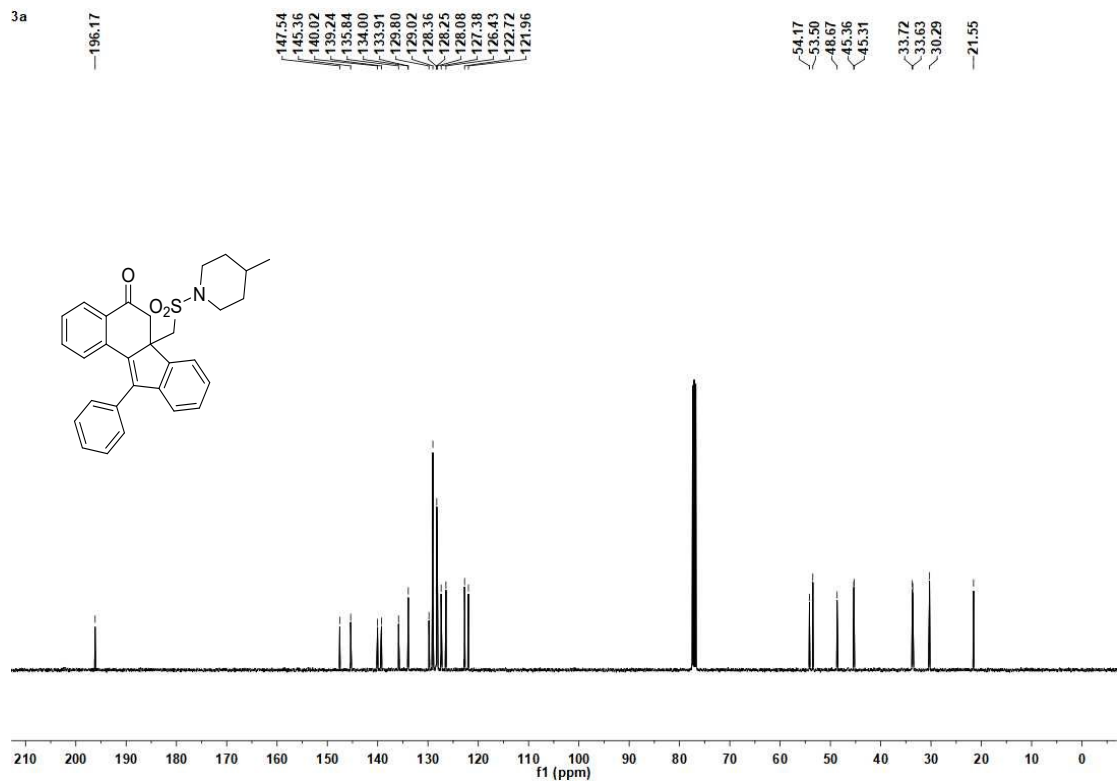

**<sup>1</sup>H NMR spectrum of 5r**

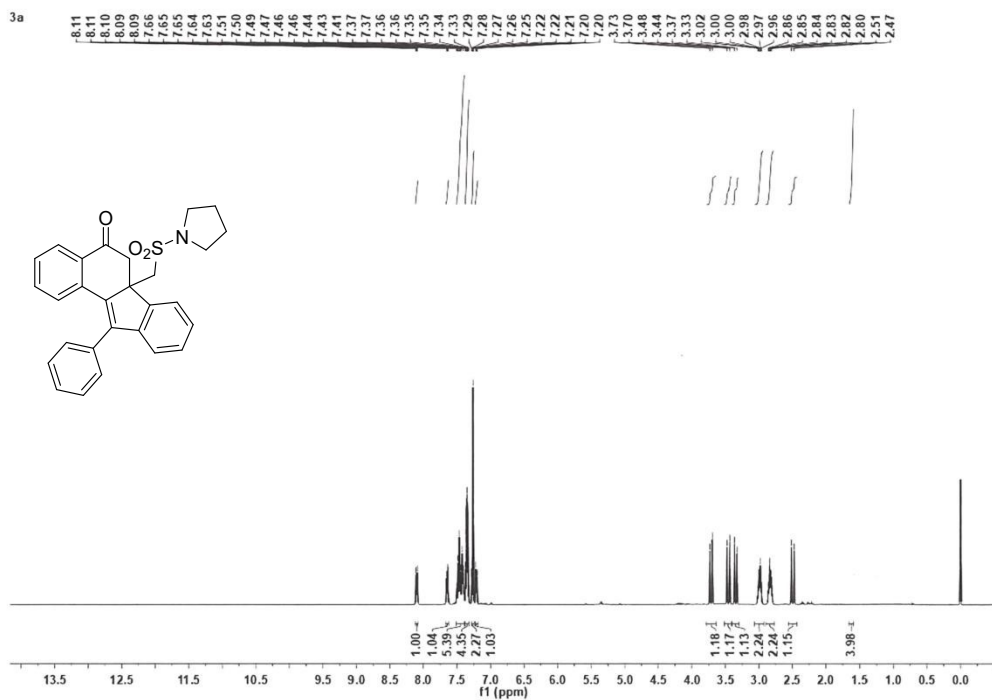

<sup>13</sup>C NMR spectrum of 5r

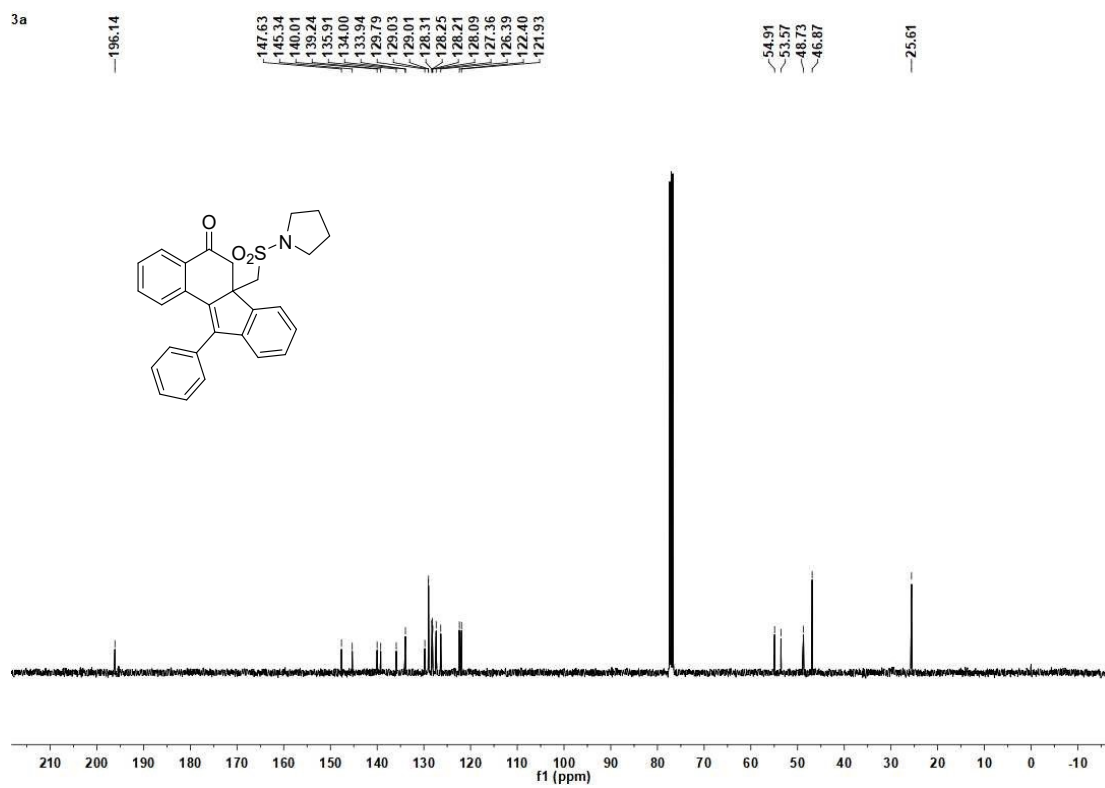

<sup>1</sup>H NMR spectrum of 5s

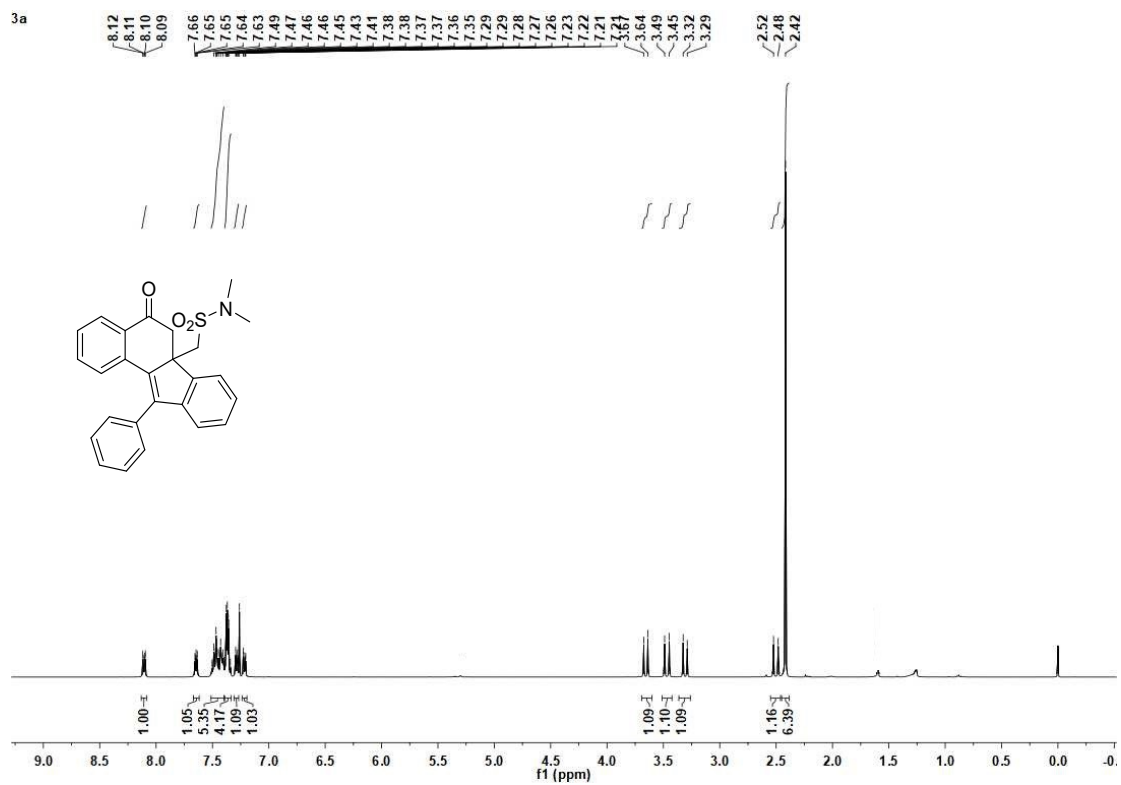

<sup>13</sup>C NMR spectrum of 5s

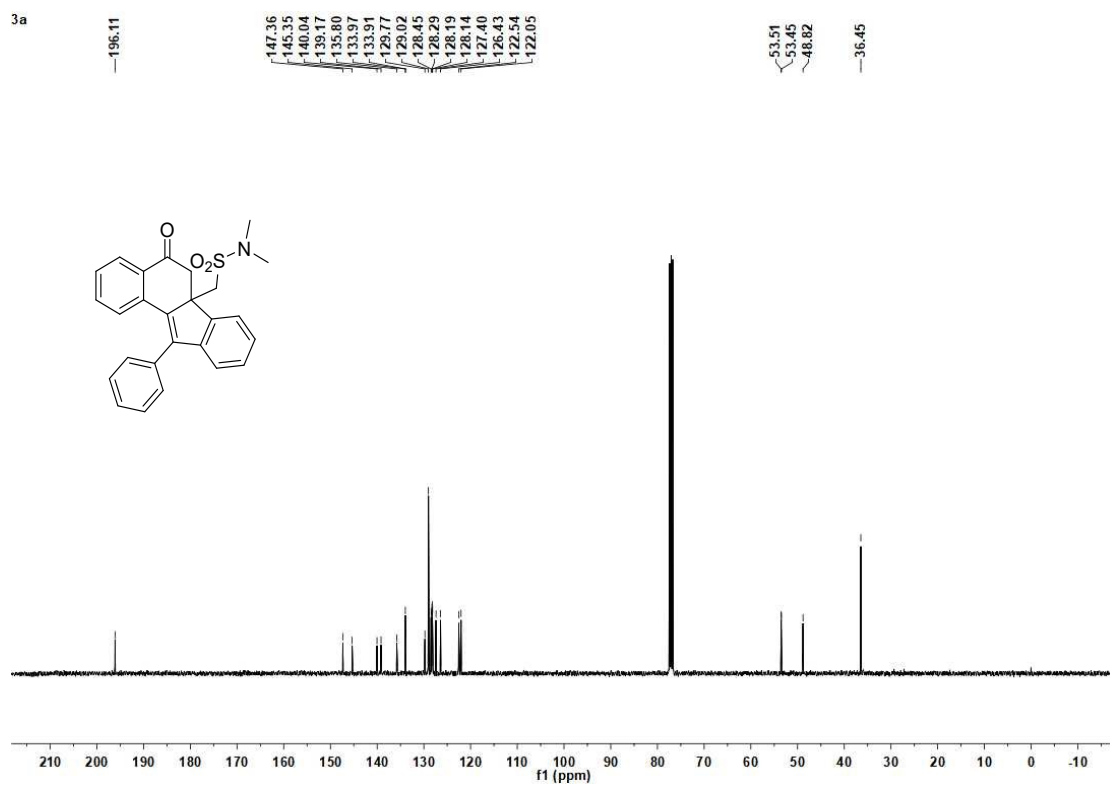

<sup>1</sup>H NMR spectrum of 5t

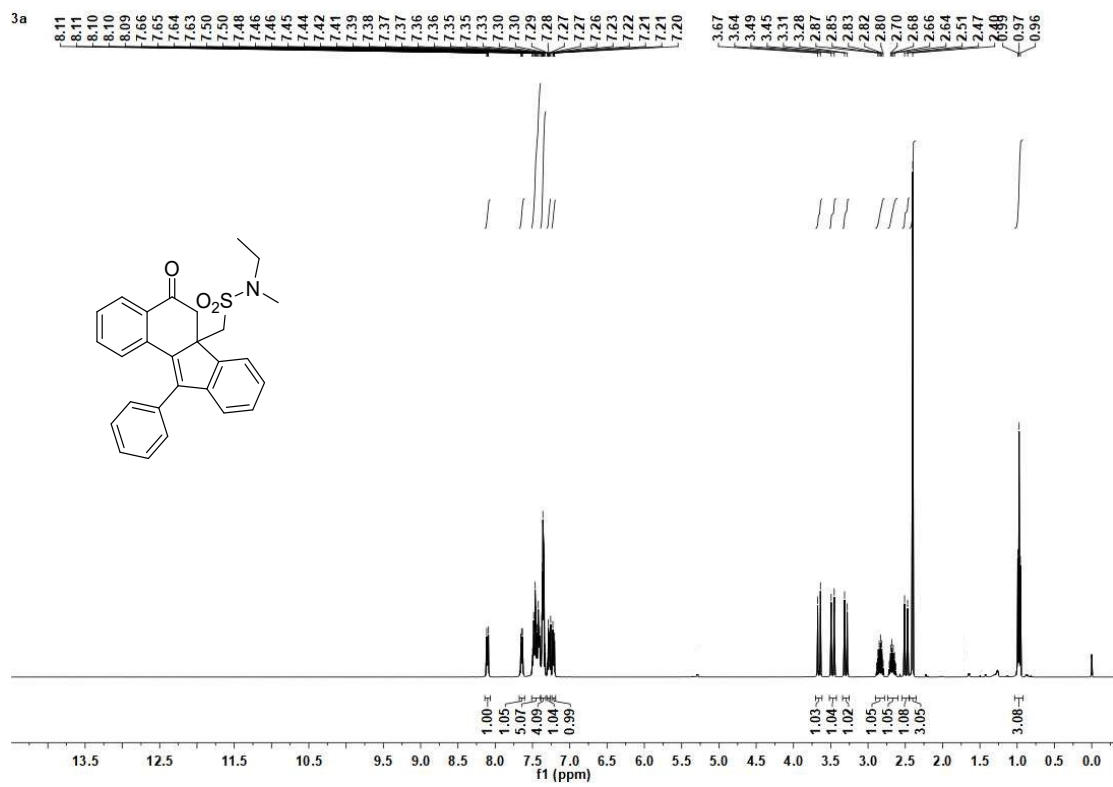

**<sup>13</sup>C NMR spectrum of 5t**

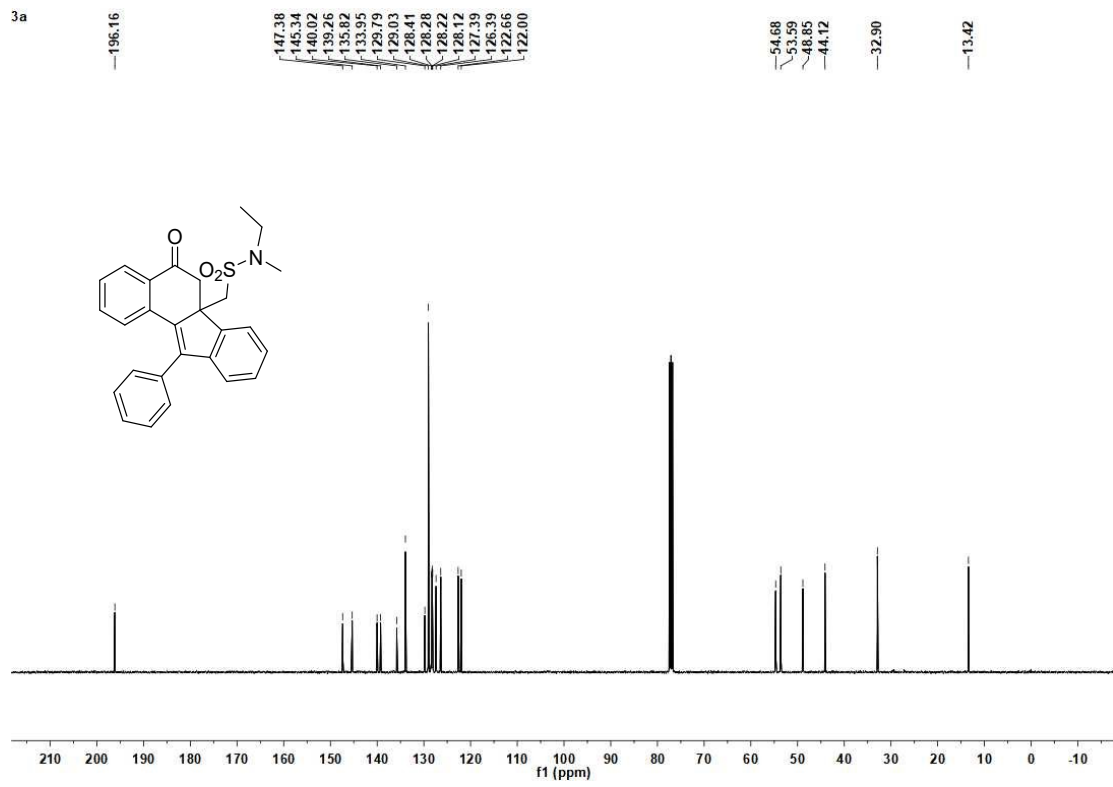

**<sup>1</sup>H NMR spectrum of 5u**

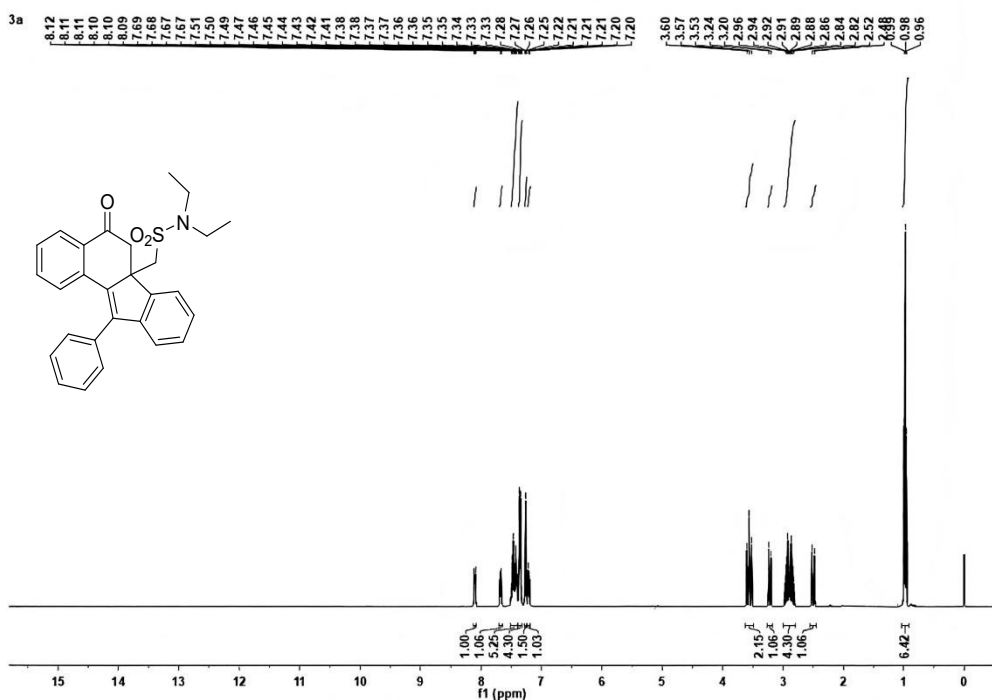

<sup>13</sup>C NMR spectrum of 5u

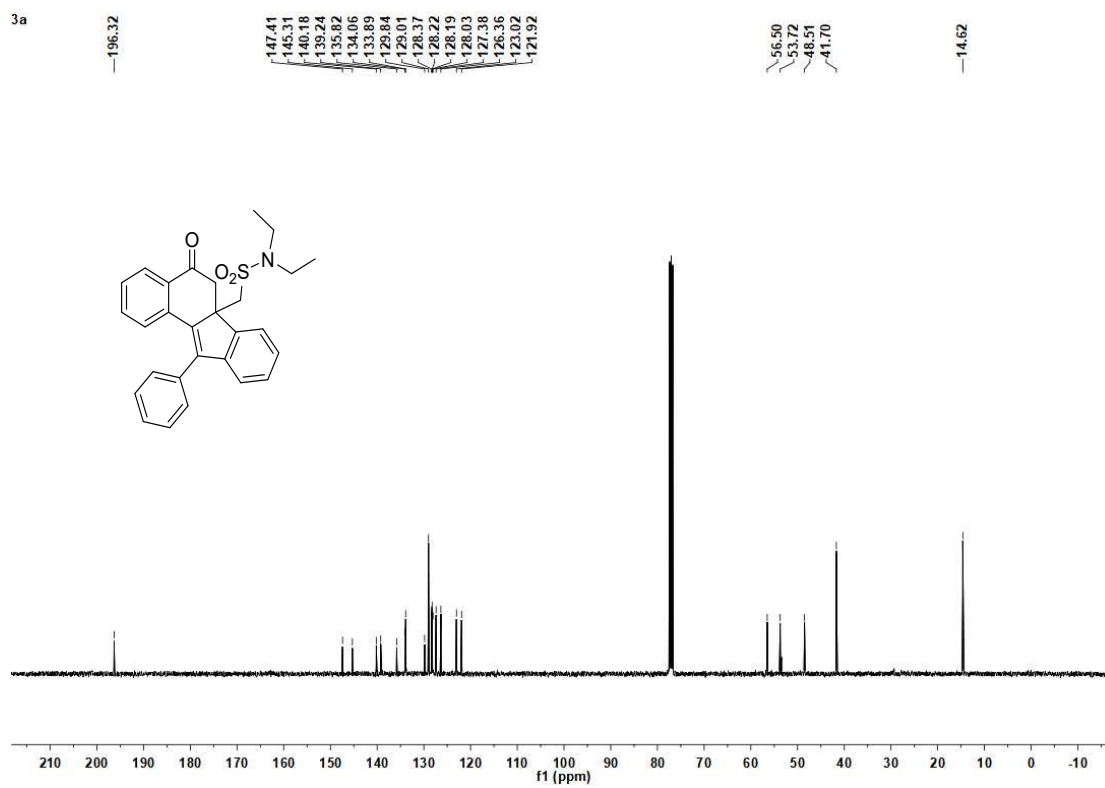

<sup>1</sup>H NMR spectrum of 5v

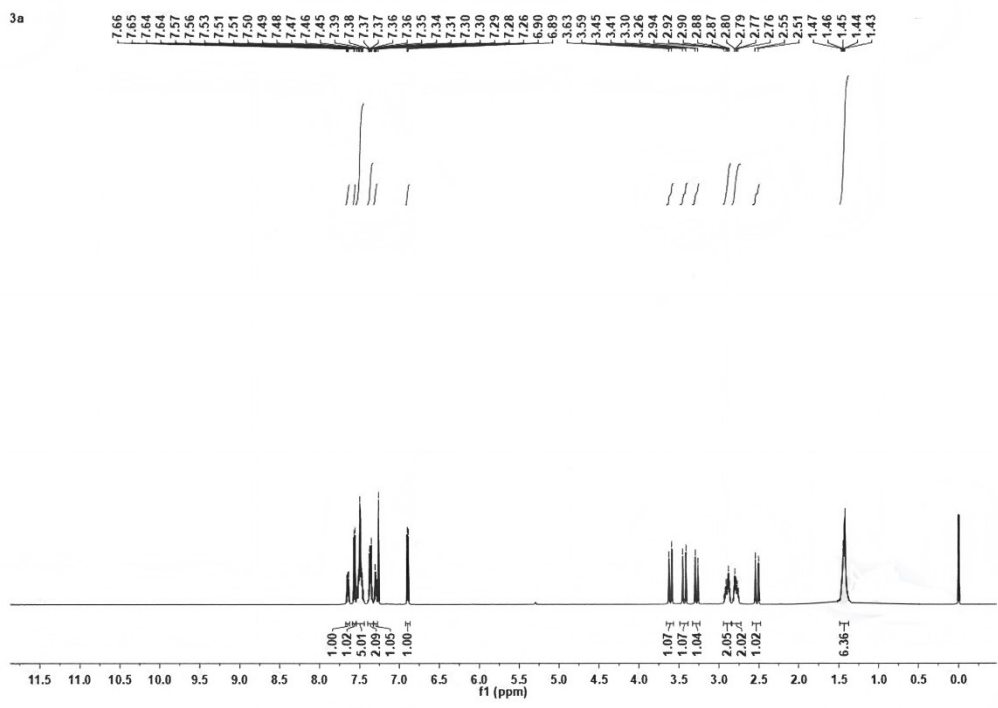

$^{13}\text{C}$  NMR spectrum of 5v

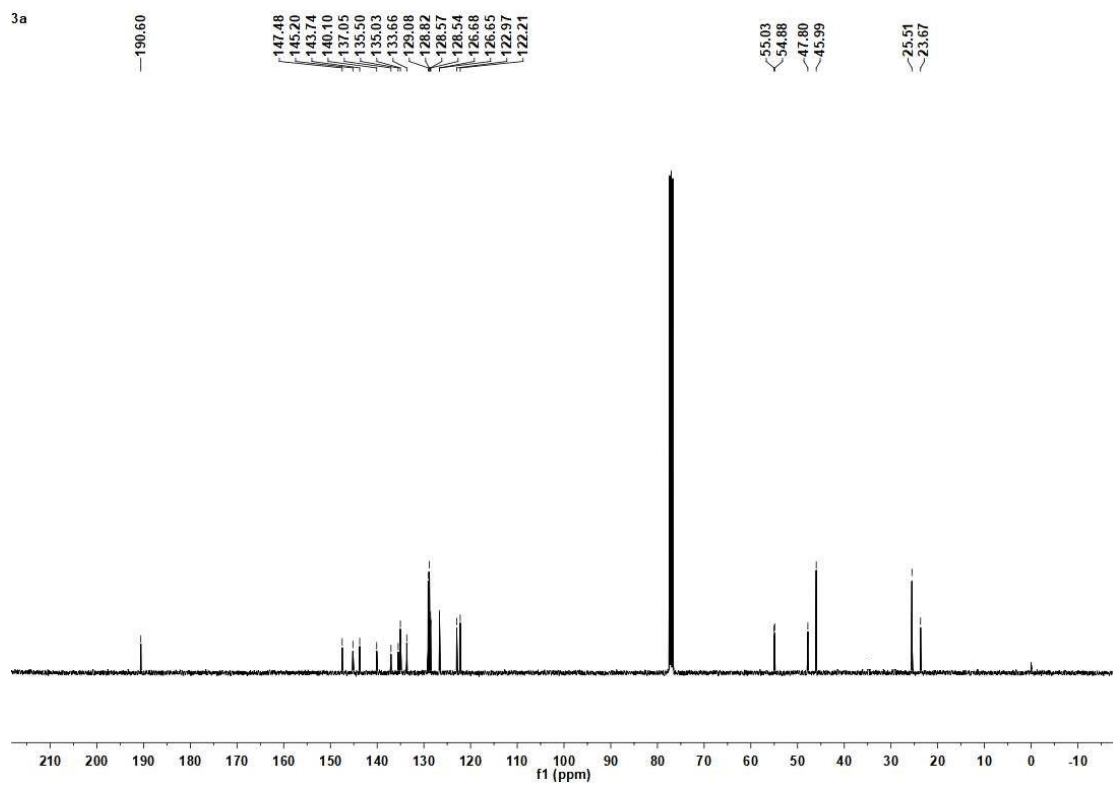

Supplement: d6ob00641h1.pdf [file d6ob00641h1.pdf]
